# Supplementary material for: A comparative study of Rh2-catalyzed intermolecular nitrene transfer reactions: mechanism and chemoselectivity
Source: Royal Society of Chemistry journal article supplement (doi:10.1039/d2cy00155a), 2022-01-01
Supplement: d2cy00155a1.pdf [file d2cy00155a1.pdf]

## Electronic supplementary information

### **A comparative study of Rh<sub>2</sub>-catalyzed intermolecular nitrene transfer reactions: mechanism and chemoselectivity**

Juping Wang,<sup>\*a</sup> Kangcheng Zheng,<sup>b</sup> Rongxing Xiao,<sup>a</sup> Li Qian<sup>c</sup> and Zijie Lin<sup>a</sup>

<sup>a</sup>*School of Pharmacy, Guangdong Pharmaceutical University, Guangzhou 510006, China*

<sup>b</sup>*School of Chemistry, Sun Yat-sen University, Guangzhou, 510275, P. R. China*

<sup>c</sup>*School of Pharmacy, Youjiang Medical University for Nationalities, 533000, P. R. China.*

Email address: [jupingwang@gdpu.edu.cn](mailto:jupingwang@gdpu.edu.cn)

## Table of Contents

|                                                                                                                                                    |    |
|----------------------------------------------------------------------------------------------------------------------------------------------------|----|
| 1. Catalytic cycles of amination vs. aziridination for the substrate carvone (Scheme S1) .....                                                     | S3 |
| 2. Relative free energy for the Rh <sub>2</sub> -mediated decomposition of imino phenyliodinanes (Scheme S2).....                                  | S3 |
| 3. Free energy profiles computed at M06L/BS3//M06L/BS1 level.....                                                                                  | S4 |
| 4. Orbitals of Rh <sub>2</sub> (esp) <sub>2</sub> -nitrene and optimized structures of Rh <sub>2</sub> (esp) <sub>2</sub> catalysis (Fig. S2)..... | S5 |
| 5. Orbitals of Rh <sub>2</sub> (OAc) <sub>4</sub> -nitrene and optimized structures of Rh <sub>2</sub> (OAc) <sub>4</sub> catalysis (Fig. S3)..... | S7 |
| 6. Comparison of steric hindrance of O <sup>-3</sup> TS1 <sub>A</sub> and O <sup>-3</sup> TS1 <sub>I</sub> (Fig. S4).....                          | S8 |
| 7. Equation S1.....                                                                                                                                | S8 |
| 8. Cartesian coordinates.....                                                                                                                      | S9 |

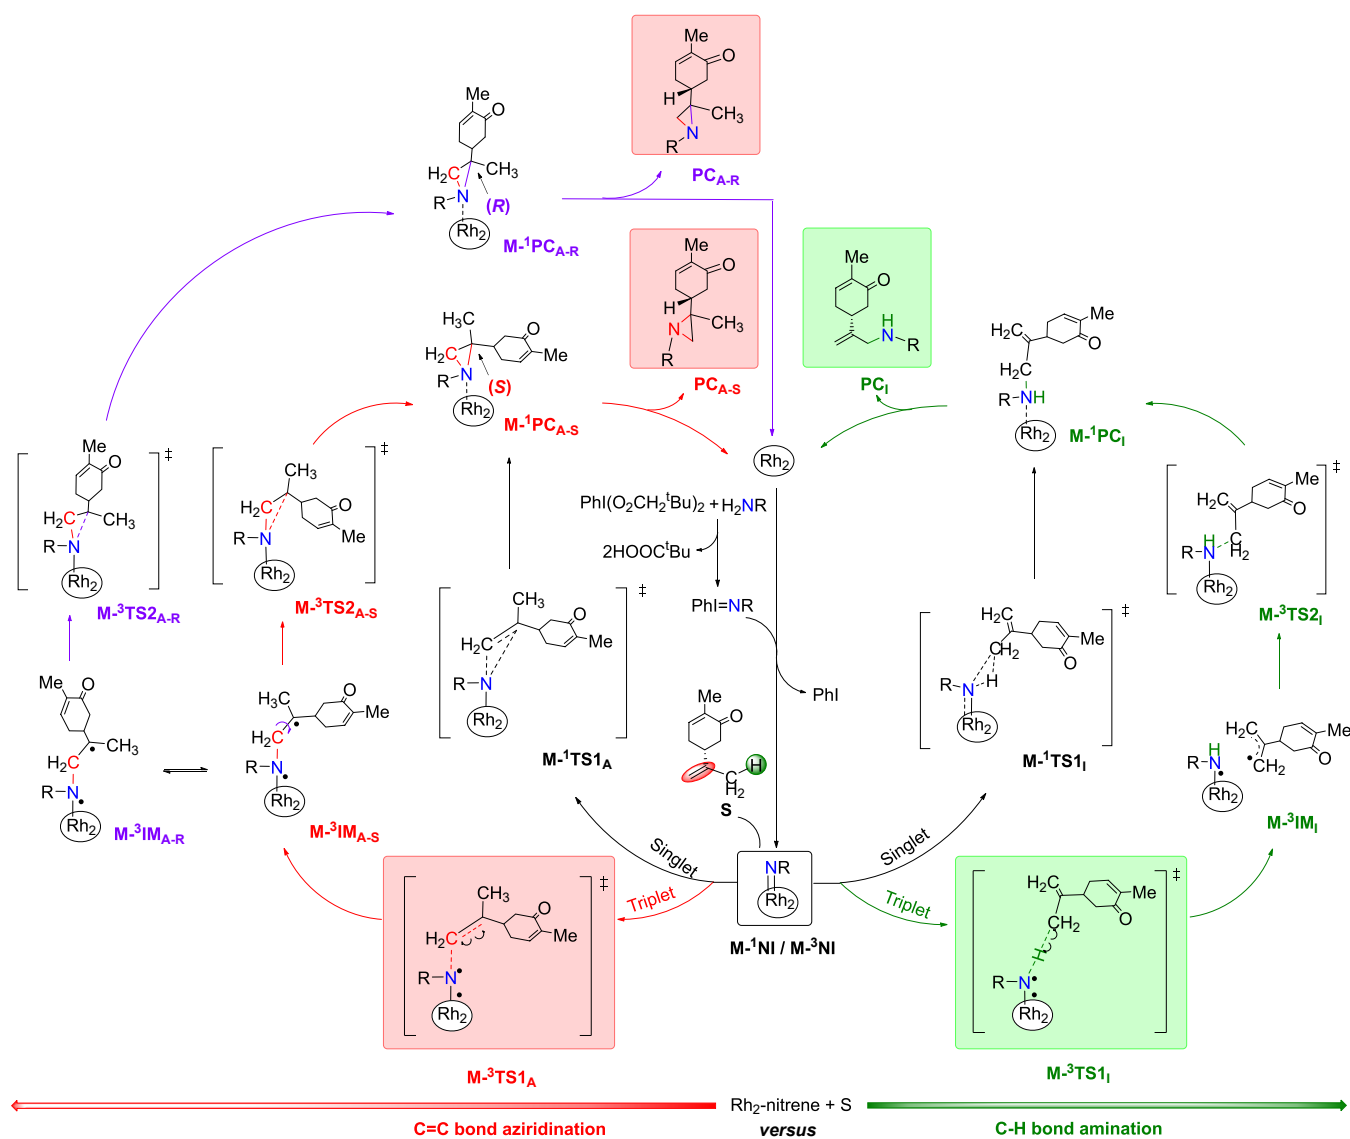

**Scheme S1** Catalytic cycles of aziridination vs. amination for the substrate carvone (S).

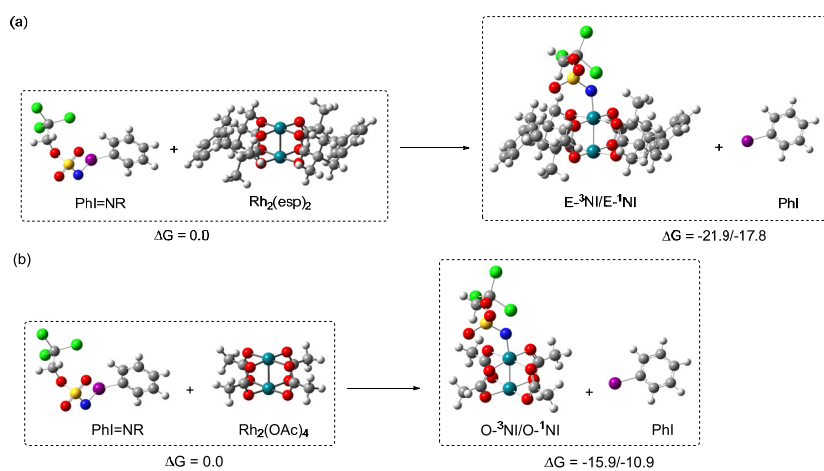

**Scheme S2** Relative free energy ( $\Delta G$ , in kcal/mol) for the  $\text{Rh}_2$ -mediated decomposition of imino phenylidines in Part I (computed at M06L/BS2//M06L/BS1 level). Obviously, the formation step of  $\text{Rh}_2$ -nitrene is exothermic.

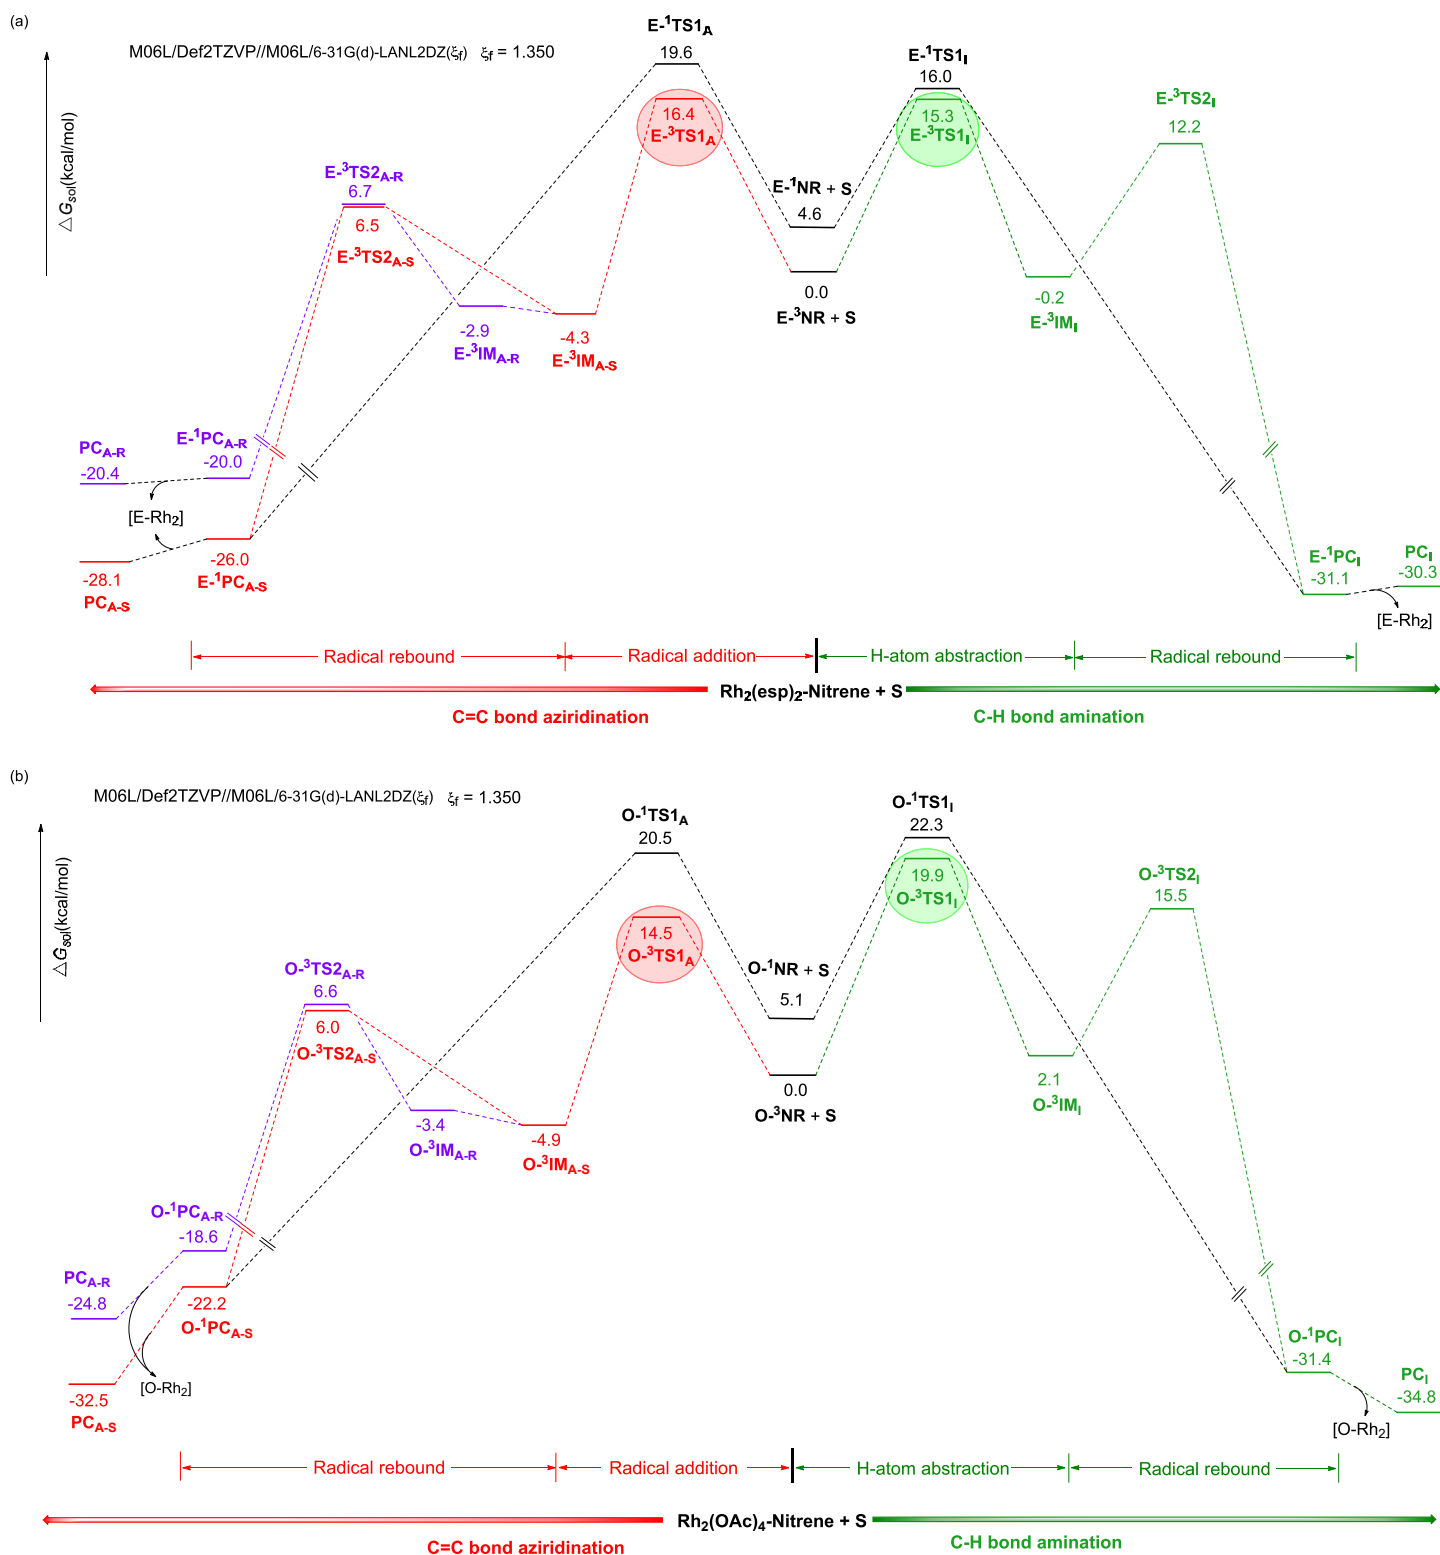

**Fig. S1** Free energy profiles of Rh<sub>2</sub>-catalyzed nitrene transfer reactions. (a) Rh<sub>2</sub>(esp)<sub>2</sub>-catalysis. (b) Rh<sub>2</sub>(OAc)<sub>4</sub>-catalysis. Energetics were computed at M06L/BS3//M06L/BS1 level. This method slightly underestimated energy of Rh<sub>2</sub>(esp)<sub>2</sub>-catalyzed amination, resulting in  $\text{E}^{-3}\text{TS1}_I$  lower in energy than  $\text{E}^{-3}\text{TS1}_A$  (13.4 vs. 14.5 kcal/mol). Relatively, computed energetics at M06L/BS2//M06L/BS1 level are more reasonable.

(a) Important Kohn Sham orbitals for singlet and triplet  $Rh_2(esp)_2$ -nitrene. SOMO: singly occupied molecular orbital

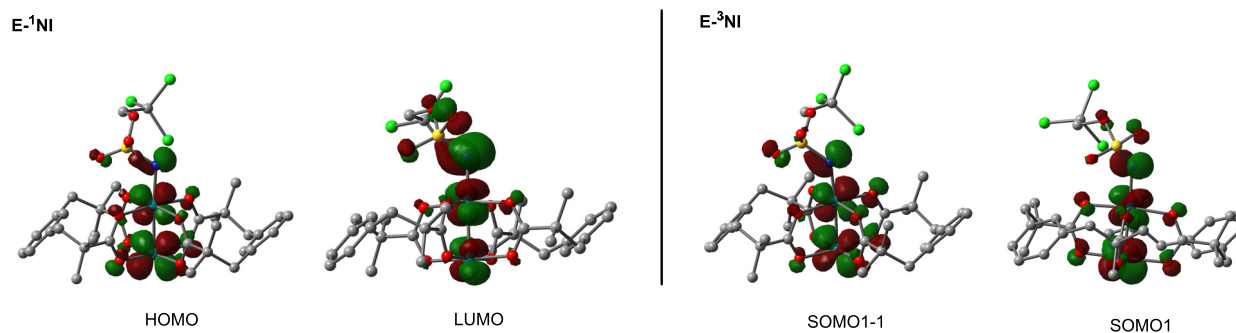

(b) Optimized structures of species with important bond lengths for  $Rh_2(esp)_2$  catalysis

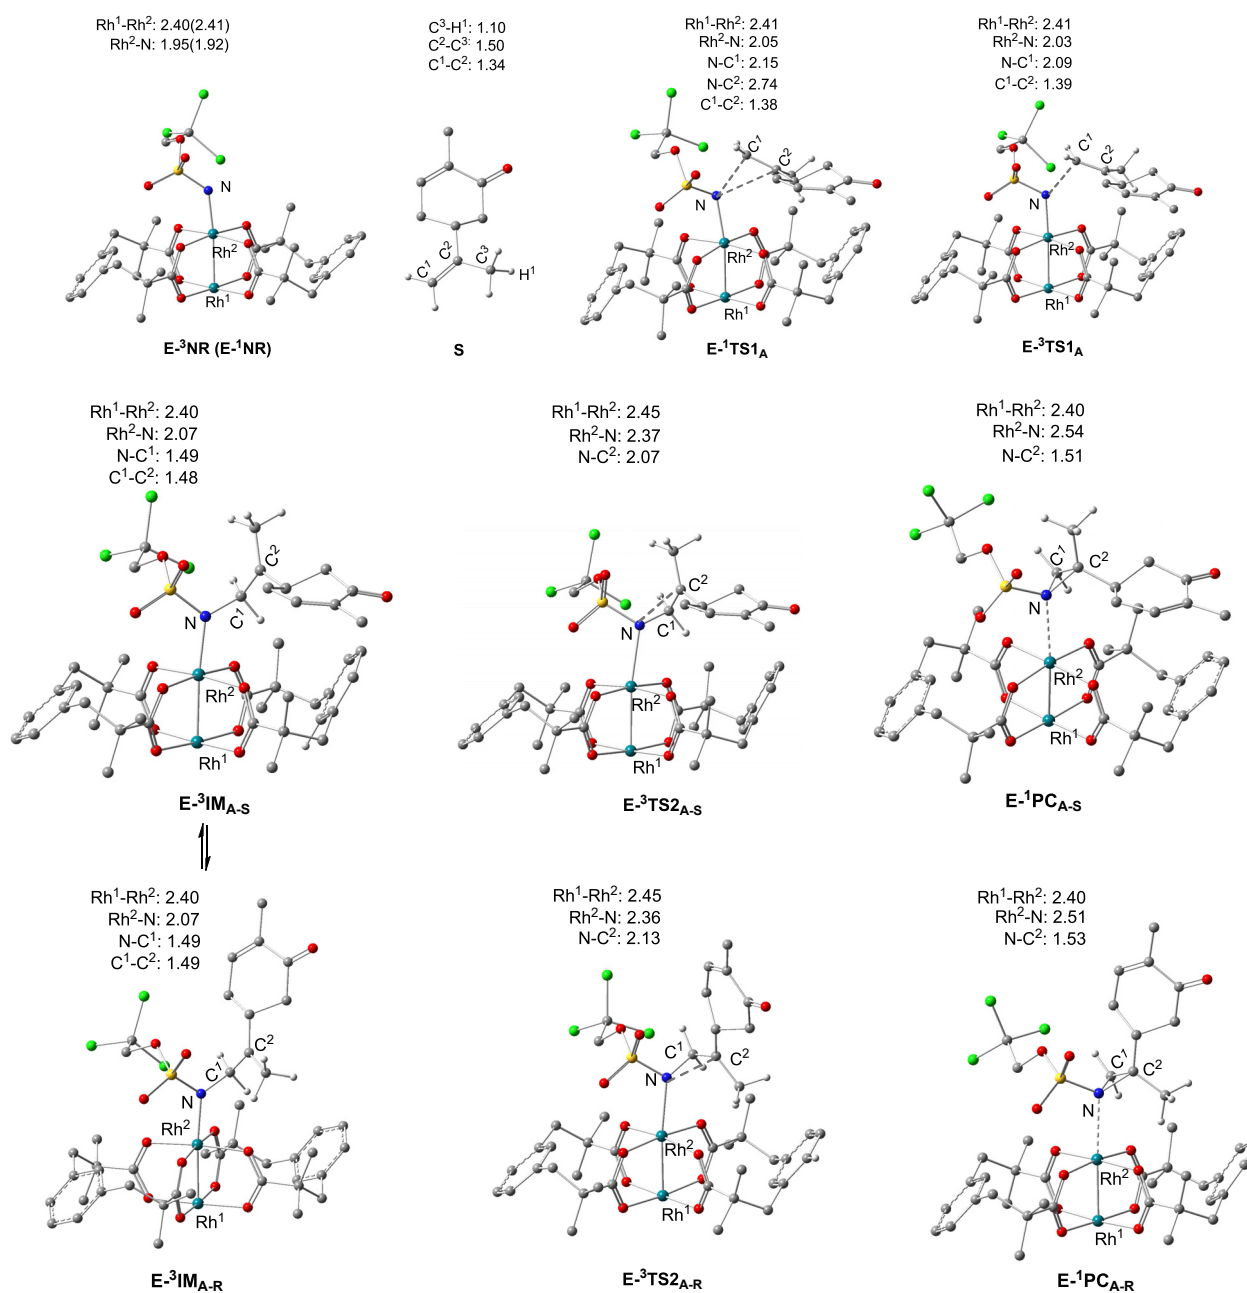

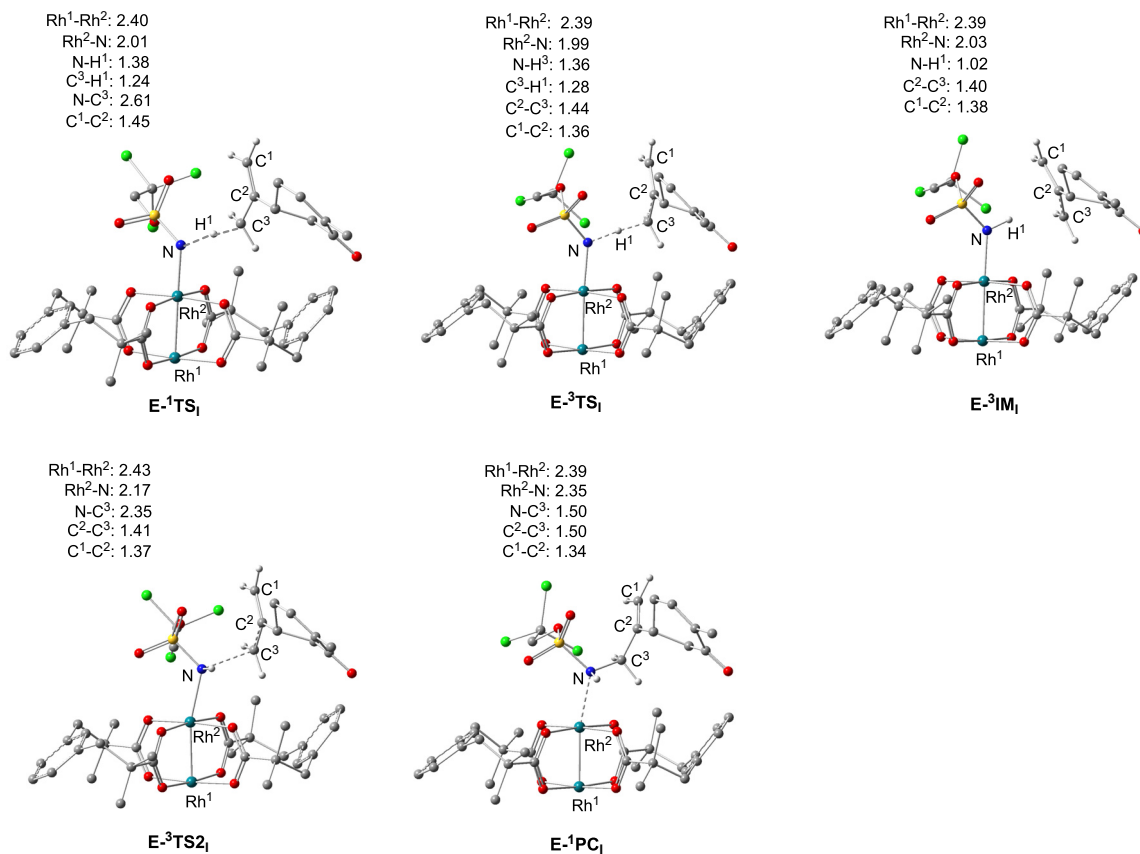

**Fig. S2** Orbitals of Rh<sub>2</sub>(esp)<sub>2</sub>-nitrene and optimized structures of Rh<sub>2</sub>(esp)<sub>2</sub>-based catalysis (bond lengths in Å). For clarity, except for H atoms related to reaction sites (i.e. –CH<sub>3</sub> and CH<sub>2</sub>=C-), other H atoms are omitted.

(a) Important Kohn Sham orbitals for singlet and triplet  $\text{Rh}_2(\text{OAc})_4$ -nitrene.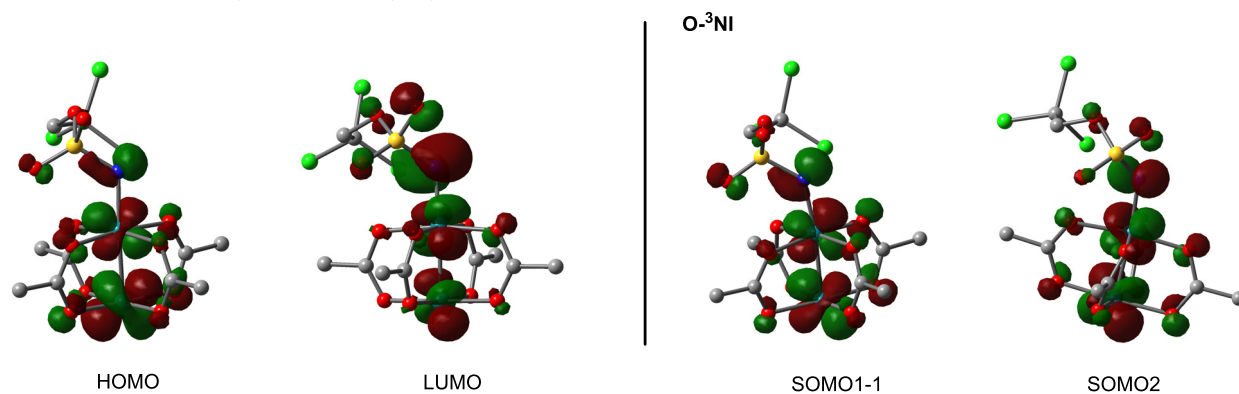(b) Optimized structures of species with important bond lengths for  $\text{Rh}_2(\text{OAc})_4$  catalysis

Rh<sup>1</sup>-Rh<sup>2</sup>: 2.42  
Rh<sup>2</sup>-N: 1.91

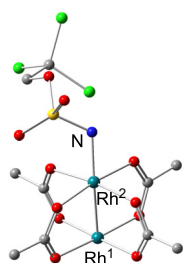

Rh<sup>1</sup>-Rh<sup>2</sup>: 2.40  
Rh<sup>2</sup>-N: 1.95

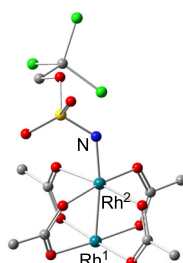

Rh<sup>1</sup>-Rh<sup>2</sup>: 2.41  
Rh<sup>2</sup>-N: 2.01  
N-C<sup>1</sup>: 2.18  
C<sup>1</sup>-C<sup>2</sup>: 1.37  
N-C<sup>2</sup>: 2.83

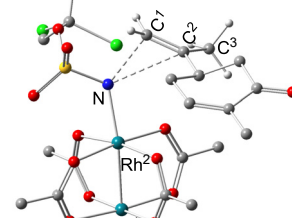

Rh<sup>1</sup>-Rh<sup>2</sup>: 2.41  
Rh<sup>2</sup>-N: 2.02  
N-C<sup>1</sup>: 2.13  
C<sup>1</sup>-C<sup>2</sup>: 1.38

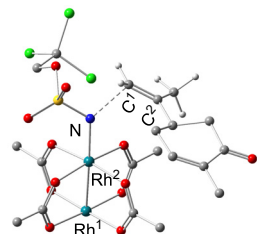

Rh<sup>1</sup>-Rh<sup>2</sup>: 2.40  
Rh<sup>2</sup>-N: 2.07  
N-C<sup>1</sup>: 1.49  
C<sup>1</sup>-C<sup>2</sup>: 1.49

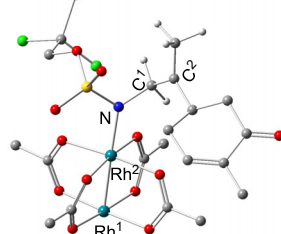

Rh<sup>1</sup>-Rh<sup>2</sup>: 2.46  
Rh<sup>2</sup>-N: 2.35  
N-C<sup>2</sup>: 2.10

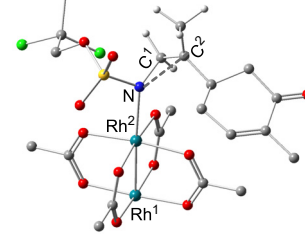

Rh<sup>1</sup>-Rh<sup>2</sup>: 2.40  
Rh<sup>2</sup>-N: 2.53  
N-C<sup>2</sup>: 1.52

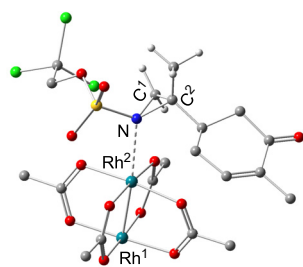

Rh<sup>1</sup>-Rh<sup>2</sup>: 2.41  
Rh<sup>2</sup>-N: 2.07  
N-C<sup>1</sup>: 1.49  
C<sup>1</sup>-C<sup>2</sup>: 1.49

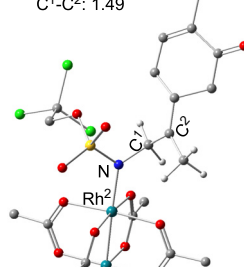

Rh<sup>1</sup>-Rh<sup>2</sup>: 2.46  
Rh<sup>2</sup>-N: 2.43  
N-C<sup>2</sup>: 2.12

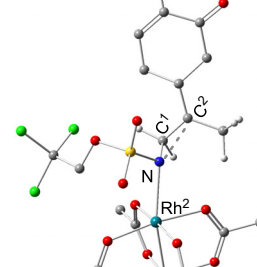

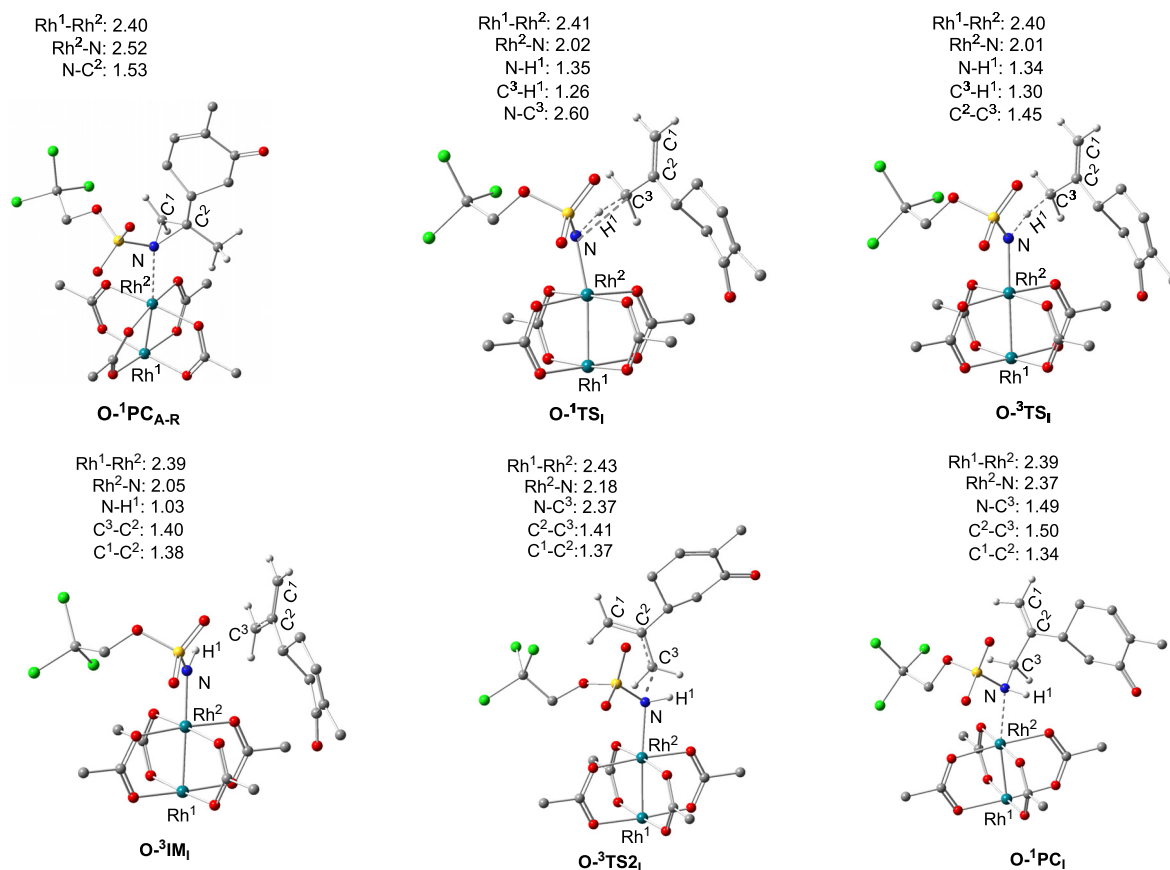

**Fig. S3** Orbitals of Rh<sub>2</sub>(OAc)<sub>4</sub>-nitrene and optimized structures of Rh<sub>2</sub>(OAc)<sub>4</sub>-based catalysis (bond lengths in Å). For clarity, except for H atoms related to reaction sites (i.e. -CH<sub>3</sub> and CH<sub>2</sub>=C-), other H atoms are omitted.

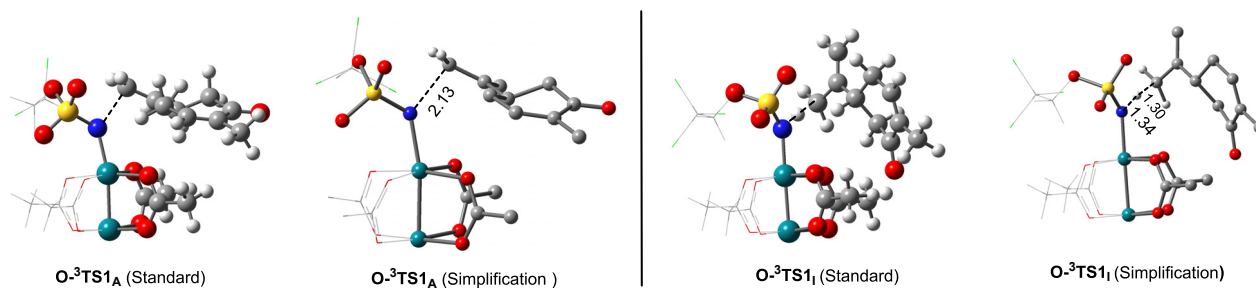

**Fig. S4** Comparison of steric hindrance of O<sup>-3</sup>TS<sub>1A</sub> and O<sup>-3</sup>TS<sub>1</sub>. Steric hindrance of between OAc ligand and substrate carvone in transition states O<sup>-3</sup>TS<sub>1A</sub> and O<sup>-3</sup>TS<sub>1</sub> are very small and has no effect on chemoselectivity. The atomic radii in O<sup>-3</sup>TS<sub>1A</sub> and O<sup>-3</sup>TS<sub>1</sub> are shown in both normal (Standard) and reduced (Simplification) sizes. In the latter, other H atoms are omitted except those H atoms on reactive groups (i.e. -CH<sub>2</sub>=C and -CH<sub>3</sub>), and a smaller atomic radii and omitted H atoms make the structures clearer. Bond lengths are shown in Å.

#### Equation S1

PC<sub>A</sub>, PC<sub>1</sub>, *k<sub>A</sub>* and *k<sub>1</sub>* denote products and rate coefficients of aziridination and amination, respectively.



## Cartesian coordinates

| E- <sup>1</sup> Nl |             |             |             |
|--------------------|-------------|-------------|-------------|
| Rh                 | -0.20990600 | -0.15889200 | -0.49762800 |
| Rh                 | -0.72484900 | -1.60075000 | 1.36753000  |
| O                  | -1.33562300 | 1.30919500  | 0.49144200  |
| C                  | -1.86920000 | 1.04950400  | 1.61607300  |
| O                  | -1.78578800 | -0.05361500 | 2.24236900  |
| O                  | -1.93139200 | -0.88629100 | -1.39293900 |
| C                  | -2.64824700 | -1.75017700 | -0.79381700 |
| O                  | -2.39691700 | -2.24471600 | 0.34898000  |
| O                  | 0.35437000  | -3.08391800 | 0.42288700  |
| C                  | 0.87365800  | -2.85713300 | -0.70963600 |
| O                  | 0.81445900  | -1.74924200 | -1.34450700 |
| O                  | 1.45492400  | 0.42763700  | 0.61920700  |
| C                  | 1.67585800  | -0.07587800 | 1.76950600  |
| O                  | 0.95199200  | -0.94467300 | 2.34259200  |
| C                  | -2.66484000 | 2.16847000  | 2.28985100  |
| C                  | -4.07526200 | 1.62337800  | 2.63806700  |
| H                  | -3.95872900 | 0.81430300  | 3.37037900  |
| H                  | -4.61482300 | 2.43952200  | 3.14039400  |
| C                  | -4.85037900 | 1.13430800  | 1.44747300  |
| C                  | -4.72570300 | -0.19421100 | 1.03326600  |
| C                  | -5.66246500 | 1.99084000  | 0.69776400  |
| C                  | -5.35293800 | -0.67055400 | -0.12085300 |
| H                  | -4.11984200 | -0.87864100 | 1.62631500  |
| C                  | -6.31762200 | 1.52741400  | -0.43904300 |
| H                  | -5.78340600 | 3.02799500  | 1.01251600  |
| C                  | -6.15762100 | 0.20819800  | -0.85221700 |
| H                  | -6.95548600 | 2.20027000  | -1.00966600 |
| H                  | -6.66593500 | -0.14877200 | -1.74863700 |
| C                  | -3.89454100 | -2.25726100 | -1.51609900 |
| C                  | -5.11398900 | -2.08366800 | -0.57156000 |
| H                  | -5.98975600 | -2.46882100 | -1.11377300 |
| H                  | -4.96248300 | -2.73322700 | 0.30019200  |
| C                  | 2.91661900  | 0.43619000  | 2.49903900  |
| C                  | 1.63268200  | -3.98832200 | -1.39981900 |
| C                  | 4.16284500  | 0.12680300  | 1.62660200  |
| H                  | 4.10079800  | 0.73635400  | 0.71454000  |
| H                  | 5.03891700  | 0.47719900  | 2.19164500  |
| C                  | 3.10749700  | -3.54234600 | -1.58819500 |
| C                  | 4.31817900  | -1.31834300 | 1.24544000  |
| C                  | 3.72191000  | -1.77711600 | 0.06940800  |
| C                  | 5.02550300  | -2.22934600 | 2.03548700  |
| C                  | 3.79921600  | -3.11451800 | -0.32454400 |
| H                  | 3.20194700  | -1.06618000 | -0.57104200 |
| C                  | 5.12060400  | -3.56504100 | 1.65310400  |
| H                  | 5.51611400  | -1.88620500 | 2.94739100  |
| C                  | 4.50824300  | -4.00832900 | 0.48351500  |
| H                  | 5.68454600  | -4.26489600 | 2.26795000  |
| H                  | 4.59394600  | -5.05416500 | 0.18539500  |
| O                  | 1.18797500  | 0.71110600  | -4.03733300 |
| S                  | 1.53868700  | 1.12636000  | -2.68813900 |
| O                  | 2.69188300  | 0.55155600  | -2.00554200 |
| N                  | 0.12394500  | 1.14973800  | -1.86373700 |
| O                  | 1.86279800  | 2.75372700  | -2.85285300 |
| C                  | 2.71434800  | 3.35475800  | -1.90069400 |
| H                  | 3.15403400  | 2.61005100  | -1.22589100 |
| H                  | 3.51716400  | 3.86797600  | -2.44312200 |
| C                  | 1.96206100  | 4.39300300  | -1.06877600 |
| Cl                 | 1.28822200  | 5.66091200  | -2.11539600 |
| Cl                 | 3.16486200  | 5.10683300  | 0.05941400  |
| Cl                 | 0.65849000  | 3.60568000  | -0.15134500 |
| C                  | -4.10563300 | -1.51387500 | -2.82957900 |
| H                  | -3.25625500 | -1.65201200 | -3.50594600 |
| H                  | -5.00600600 | -1.89792400 | -3.32606500 |
| H                  | -4.23094800 | -0.43795500 | -2.67339900 |
| C                  | -3.68908400 | -3.75259900 | -1.78283800 |
| H                  | -4.57952900 | -4.16576100 | -2.27237200 |
| H                  | -2.83535200 | -3.92250900 | -2.45034000 |
| H                  | -3.51753800 | -4.30532300 | -0.85300200 |
| C                  | -2.76603200 | 3.39475200  | 1.38988700  |
| H                  | -3.38822000 | 4.15622000  | 1.87783100  |
| H                  | -1.78212100 | 3.83658700  | 1.20352800  |
| H                  | -3.21000300 | 3.15567600  | 0.41870200  |
| C                  | -1.93187800 | 2.52874700  | 3.58606400  |
| H                  | -0.92629900 | 2.91471900  | 3.37356800  |
| H                  | -2.48119400 | 3.31481200  | 4.11854500  |
| H                  | -1.83737700 | 1.66108400  | 4.24744200  |
| C                  | 2.78759500  | 1.95520700  | 2.64443100  |
| H                  | 1.91374600  | 2.22949300  | 3.24917500  |
| H                  | 3.67814400  | 2.35849500  | 3.14204900  |
| H                  | 2.68765600  | 2.44043800  | 1.66777600  |

## ARTICLE

## Journal Name

|   |             |             |             |
|---|-------------|-------------|-------------|
| C | 3.03626300  | -0.22160400 | 3.86835200  |
| H | 3.92959100  | 0.16020900  | 4.37904900  |
| H | 2.16498200  | -0.00100500 | 4.49367900  |
| H | 3.12215300  | -1.30970500 | 3.78875500  |
| C | 1.00881500  | -4.21387500 | -2.78008300 |
| H | 1.56489400  | -4.99436500 | -3.31359800 |
| H | -0.03238800 | -4.54978000 | -2.69642500 |
| H | 1.02890700  | -3.29995800 | -3.38242000 |
| C | 1.55405800  | -5.26371000 | -0.56851900 |
| H | 0.51700900  | -5.58890300 | -0.43325500 |
| H | 2.09928200  | -6.06660300 | -1.08095000 |
| H | 1.99094300  | -5.12938300 | 0.42576600  |
| H | 3.12129700  | -2.71465700 | -2.30997600 |
| H | 3.63564800  | -4.38705600 | -2.05411800 |

E-<sup>3</sup>NI

|    |             |             |             |
|----|-------------|-------------|-------------|
| Rh | -0.25185400 | -0.12443300 | -0.47604800 |
| Rh | -0.77364500 | -1.57702000 | 1.35807300  |
| O  | -1.34170200 | 1.35726700  | 0.47765600  |
| C  | -1.88256500 | 1.10412300  | 1.60216600  |
| O  | -1.81210700 | -0.00793900 | 2.21336200  |
| O  | -1.97411300 | -0.79708500 | -1.40492800 |
| C  | -2.69285600 | -1.67302300 | -0.82489500 |
| O  | -2.45356600 | -2.19012400 | 0.31083300  |
| O  | 0.27763900  | -3.10017200 | 0.47593800  |
| C  | 0.80687400  | -2.87237300 | -0.65531400 |
| O  | 0.75548100  | -1.76679400 | -1.28811300 |
| O  | 1.41876000  | 0.47235300  | 0.65334100  |
| C  | 1.62811800  | -0.05434300 | 1.79663900  |
| O  | 0.90621100  | -0.93889100 | 2.34872200  |
| C  | -2.66290600 | 2.22582700  | 2.28244600  |
| C  | -4.08569500 | 1.69892800  | 2.61061100  |
| H  | -3.98862900 | 0.88267300  | 3.33789300  |
| H  | -4.61685200 | 2.51906000  | 3.11516800  |
| C  | -4.85891400 | 1.22984800  | 1.41066500  |
| C  | -4.75432900 | -0.09863300 | 0.99046100  |
| C  | -5.65310700 | 2.10341700  | 0.66152200  |
| C  | -5.38394500 | -0.55946700 | -0.16867300 |
| H  | -4.16389100 | -0.79691400 | 1.58302800  |
| C  | -6.31165700 | 1.65568900  | -0.47965600 |
| H  | -5.75893900 | 3.14076300  | 0.98105900  |
| C  | -6.17178100 | 0.33584900  | -0.89834500 |
| H  | -6.93699100 | 2.34117100  | -1.04909700 |
| H  | -6.68310300 | -0.00858100 | -1.79788200 |
| C  | -3.93932400 | -2.16040800 | -1.56156900 |
| C  | -5.16455500 | -1.97367200 | -0.62632400 |
| H  | -6.04183300 | -2.34060600 | -1.17846900 |
| H  | -5.03138000 | -2.63147000 | 0.24223700  |
| C  | 2.85786300  | 0.44304900  | 2.55468800  |
| C  | 1.57152300  | -4.00653800 | -1.33434900 |
| C  | 4.11737100  | 0.10893600  | 1.71099600  |
| H  | 4.08922900  | 0.71887500  | 0.79711700  |
| H  | 4.98758900  | 0.44445600  | 2.29374900  |
| C  | 3.05173500  | -3.56695800 | -1.49624300 |
| C  | 4.25297900  | -1.34102900 | 1.33957100  |
| C  | 3.66215200  | -1.80166700 | 0.16147800  |
| C  | 4.93692200  | -2.25598600 | 2.14535500  |
| C  | 3.72633900  | -3.14279800 | -0.22205200 |
| H  | 3.16141800  | -1.09257900 | -0.49556600 |
| C  | 5.01608100  | -3.59632800 | 1.77556600  |
| H  | 5.42163000  | -1.91236600 | 3.06025400  |
| C  | 4.41218300  | -4.04023200 | 0.60183600  |
| H  | 5.56219400  | -4.29916800 | 2.40300300  |
| H  | 4.48812500  | -5.08911600 | 0.31208900  |
| O  | 1.38136600  | 0.76787500  | -4.25382200 |
| S  | 1.69349300  | 0.99162600  | -2.85780600 |
| O  | 2.79245200  | 0.28407700  | -2.20995800 |
| N  | 0.33119100  | 0.96765500  | -1.97743100 |
| O  | 2.06859300  | 2.60924400  | -2.80270800 |
| C  | 2.79419200  | 3.06086500  | -1.67309600 |
| H  | 2.90049700  | 2.27473600  | -0.91301200 |
| H  | 3.78993900  | 3.38031900  | -2.00281600 |
| C  | 2.08857500  | 4.25767200  | -1.04185100 |
| Cl | 1.85287900  | 5.54803600  | -2.24091000 |
| Cl | 3.17342900  | 4.84747000  | 0.26723600  |
| Cl | 0.52850000  | 3.75618400  | -0.35822900 |
| C  | -4.13006700 | -1.40701200 | -2.87247200 |
| H  | -3.27480800 | -1.54849900 | -3.54060800 |
| H  | -5.02837600 | -1.78023900 | -3.38085900 |
| H  | -4.24776500 | -0.33099700 | -2.71133600 |
| C  | -3.75424000 | -3.65680000 | -1.83603400 |
| H  | -4.64784200 | -4.05429800 | -2.33277300 |
| H  | -2.89961900 | -3.83482300 | -2.50026800 |

|   |             |             |             |
|---|-------------|-------------|-------------|
| H | -3.59507600 | -4.21751300 | -0.90885300 |
| C | -2.73232200 | 3.46473600  | 1.39713500  |
| H | -3.35150600 | 4.22890700  | 1.88421700  |
| H | -1.73834900 | 3.89499300  | 1.23689000  |
| H | -3.16353500 | 3.24518600  | 0.41548600  |
| C | -1.93871600 | 2.55742600  | 3.59155400  |
| H | -0.92680400 | 2.93477800  | 3.39577200  |
| H | -2.48517200 | 3.34156400  | 4.12958800  |
| H | -1.86241300 | 1.67917000  | 4.24111400  |
| C | 2.74651800  | 1.96275300  | 2.69627200  |
| H | 1.87510500  | 2.24706000  | 3.29938900  |
| H | 3.64034900  | 2.35847800  | 3.19431900  |
| H | 2.65482500  | 2.44927400  | 1.71999100  |
| C | 2.94109100  | -0.21255300 | 3.92817100  |
| H | 3.82644900  | 0.16255600  | 4.45748800  |
| H | 2.05856900  | 0.01844800  | 4.53378000  |
| H | 3.01834100  | -1.30158300 | 3.85411300  |
| C | 0.97179000  | -4.22600000 | -2.72603500 |
| H | 1.53381600  | -5.00772700 | -3.25135600 |
| H | -0.07246900 | -4.55651800 | -2.66226300 |
| H | 1.00811400  | -3.31071800 | -3.32556300 |
| C | 1.47322500  | -5.28350700 | -0.50739800 |
| H | 0.43276000  | -5.60463800 | -0.38975000 |
| H | 2.02303500  | -6.08745300 | -1.01324700 |
| H | 1.89509700  | -5.15386000 | 0.49403100  |
| H | 3.08321900  | -2.73846800 | -2.21621100 |
| H | 3.58311800  | -4.41449600 | -1.95327200 |

**E<sup>-1</sup>TS1<sub>A</sub>**

|    |             |             |             |
|----|-------------|-------------|-------------|
| Rh | 0.13559500  | -0.30072900 | 0.01774300  |
| Rh | 0.53158400  | -2.34032200 | 1.23081100  |
| O  | -0.45482700 | 0.53448700  | 1.87876500  |
| C  | -0.58567200 | -0.23973400 | 2.87904200  |
| O  | -0.32358100 | -1.48254000 | 2.90520100  |
| O  | -1.76886500 | -0.99000000 | -0.41730000 |
| C  | -2.04257500 | -2.20737900 | -0.14154700 |
| O  | -1.31178700 | -2.98917900 | 0.53588800  |
| O  | 1.36952500  | -3.14960400 | -0.46671100 |
| C  | 1.21547000  | -2.52271700 | -1.55870500 |
| O  | 0.69554200  | -1.36535800 | -1.68932900 |
| O  | 2.12111300  | 0.18361700  | 0.58123500  |
| C  | 2.75608100  | -0.55739800 | 1.39742600  |
| O  | 2.34694700  | -1.66092200 | 1.87389900  |
| C  | -1.11512100 | 0.34211400  | 4.19327300  |
| C  | -2.45227200 | -0.37928700 | 4.53010100  |
| H  | -2.20792900 | -1.40084200 | 4.84841200  |
| H  | -2.88075700 | 0.13434800  | 5.40338600  |
| C  | -3.45936200 | -0.44594600 | 3.41277400  |
| C  | -3.46086600 | -1.55488700 | 2.56125600  |
| C  | -4.41088100 | 0.55683700  | 3.19105600  |
| C  | -4.36173400 | -1.68065600 | 1.50041200  |
| H  | -2.73819100 | -2.35259300 | 2.73815400  |
| C  | -5.31583400 | 0.45338300  | 2.13513200  |
| H  | -4.45074100 | 1.41851100  | 3.85943500  |
| C  | -5.28893600 | -0.65412100 | 1.28951700  |
| H  | -6.06367500 | 1.22903300  | 1.97227200  |
| H  | -6.02006400 | -0.73406700 | 0.48310000  |
| C  | -3.37771000 | -2.76907300 | -0.62244400 |
| C  | -4.29651000 | -2.90267800 | 0.62649500  |
| H  | -5.29790100 | -3.17190400 | 0.26028800  |
| H  | -3.93357400 | -3.75168800 | 1.22087200  |
| C  | 4.13720100  | -0.06972700 | 1.83389000  |
| C  | 1.71661500  | -3.19682500 | -2.83537400 |
| C  | 5.04122600  | 0.00989600  | 0.57451100  |
| H  | 4.69350800  | 0.85157200  | -0.04112400 |
| H  | 6.05234400  | 0.26722400  | 0.92313300  |
| C  | 3.07740700  | -2.54946500 | -3.22273400 |
| H  | 3.45739200  | -3.11739000 | -4.08496500 |
| H  | 2.87218000  | -1.52871500 | -3.57191300 |
| C  | 5.06750300  | -1.23483800 | -0.26850500 |
| C  | 4.14309700  | -1.36736500 | -1.30550400 |
| C  | 5.98088500  | -2.27147400 | -0.05521700 |
| C  | 4.10578500  | -2.49413600 | -2.12801500 |
| H  | 3.44023800  | -0.55838800 | -1.49501600 |
| C  | 5.95921100  | -3.40410900 | -0.86588500 |
| H  | 6.72611700  | -2.18199300 | 0.73653700  |
| C  | 5.02892400  | -3.51780100 | -1.89691500 |
| H  | 6.68397700  | -4.20011400 | -0.70129200 |
| H  | 5.03029500  | -4.40028600 | -2.53818300 |
| O  | 0.11183700  | 1.87114700  | -3.49170500 |
| S  | 0.95066000  | 1.73554000  | -2.31037000 |
| O  | 2.13060000  | 0.87934100  | -2.34547200 |
| N  | 0.18302300  | 1.54393800  | -0.87278000 |

|    |             |             |             |
|----|-------------|-------------|-------------|
| O  | 1.55619100  | 3.30243500  | -2.12758900 |
| C  | 2.73152900  | 3.38109900  | -1.34878900 |
| H  | 2.92898200  | 2.44615800  | -0.80515800 |
| H  | 3.58465000  | 3.59662300  | -2.00481300 |
| C  | 2.63941300  | 4.50971000  | -0.32583700 |
| Cl | 2.13551000  | 6.02774600  | -1.10811000 |
| Cl | 4.28443700  | 4.69992400  | 0.36929700  |
| Cl | 1.50137900  | 4.10782800  | 0.99151700  |
| C  | -1.24405900 | 3.13165000  | -1.12762600 |
| C  | -2.33464300 | 2.56506300  | -0.50510900 |
| H  | -1.20185300 | 3.21213000  | -2.20837200 |
| H  | -0.58713900 | 3.78965400  | -0.56716800 |
| C  | -2.44119400 | 2.62746000  | 0.96852000  |
| C  | -3.41166200 | 1.82943400  | -1.22438400 |
| H  | -3.21554700 | 3.34640600  | 1.27935700  |
| H  | -1.49385700 | 2.92421100  | 1.42425700  |
| H  | -2.74122100 | 1.65298300  | 1.37616000  |
| C  | -4.78365700 | 2.47487000  | -0.95900600 |
| C  | -3.20524700 | 1.63855800  | -2.72034400 |
| H  | -3.44965700 | 0.83162500  | -0.75441100 |
| H  | -4.81229000 | 3.47838500  | -1.41478400 |
| H  | -4.98237200 | 2.59707800  | 0.11079100  |
| C  | -5.90319200 | 1.64377900  | -1.55199400 |
| C  | -4.40087300 | 1.04119300  | -3.38115500 |
| H  | -2.97133800 | 2.60154900  | -3.20745000 |
| H  | -2.31870100 | 1.01388600  | -2.90267800 |
| C  | -5.64176500 | 1.00061400  | -2.85278100 |
| O  | -6.98196500 | 1.53792800  | -0.98143000 |
| H  | -4.23535200 | 0.58327700  | -4.35956300 |
| C  | -6.79436200 | 0.30397500  | -3.49634900 |
| H  | -7.63434100 | 0.98920300  | -3.66215000 |
| H  | -6.51094300 | -0.14459700 | -4.45402000 |
| H  | -7.18049200 | -0.48700300 | -2.84065400 |
| C  | 3.98897900  | 1.33324700  | 2.42539600  |
| H  | 3.36880500  | 1.32243300  | 3.33086000  |
| H  | 4.97332600  | 1.73396900  | 2.69854800  |
| H  | 3.52507300  | 2.01950800  | 1.70922900  |
| C  | 4.74023400  | -1.01954800 | 2.86278100  |
| H  | 5.72396900  | -0.64436900 | 3.17359800  |
| H  | 4.10752300  | -1.09740300 | 3.75345800  |
| H  | 4.86718400  | -2.02855100 | 2.45776900  |
| C  | 1.88719000  | -4.69446200 | -2.60161800 |
| H  | 0.94072100  | -5.16196700 | -2.30519300 |
| H  | 2.22898400  | -5.17450700 | -3.52773500 |
| H  | 2.61763600  | -4.89822200 | -1.81284500 |
| C  | 0.72581000  | -2.93777200 | -3.97052400 |
| H  | 1.09731600  | -3.38880000 | -4.89902800 |
| H  | -0.25454200 | -3.38092400 | -3.75474300 |
| H  | 0.58495800  | -1.86490900 | -4.13762700 |
| C  | -3.14556000 | -4.15832300 | -1.21842600 |
| H  | -4.10583800 | -4.60448700 | -1.50537300 |
| H  | -2.52100800 | -4.10463400 | -2.11883600 |
| H  | -2.65226300 | -4.82217300 | -0.50244700 |
| C  | -4.02129100 | -1.85626300 | -1.65395100 |
| H  | -3.34296700 | -1.64522700 | -2.48939900 |
| H  | -4.92774200 | -2.32595400 | -2.05806000 |
| H  | -4.31323200 | -0.89832800 | -1.21502100 |
| C  | -1.32718400 | 1.84721900  | 4.11058600  |
| H  | -1.56169800 | 2.23956800  | 5.10830900  |
| H  | -0.43053100 | 2.36007600  | 3.74399500  |
| H  | -2.15703900 | 2.10516500  | 3.44693600  |
| C  | -0.10030400 | 0.02428900  | 5.29555400  |
| H  | 0.84943300  | 0.54642300  | 5.12332700  |
| H  | -0.48889100 | 0.35436100  | 6.26707100  |
| H  | 0.10539700  | -1.04898700 | 5.34769200  |

**E-<sup>3</sup>TS1<sub>A</sub>**

|    |             |             |             |
|----|-------------|-------------|-------------|
| Rh | 0.31488800  | -0.27103700 | -0.06675100 |
| Rh | 0.86152700  | -1.96298100 | 1.55875600  |
| O  | -0.53479800 | 0.84894100  | 1.50748300  |
| C  | -0.49866400 | 0.35637700  | 2.68176000  |
| O  | -0.02069500 | -0.77618500 | 2.99895400  |
| O  | -1.48922200 | -1.30217000 | -0.38386400 |
| C  | -1.67960800 | -2.39997700 | 0.23451300  |
| O  | -0.91943900 | -2.89752700 | 1.12096000  |
| O  | 1.73233900  | -3.10080800 | 0.08626100  |
| C  | 1.67107300  | -2.67246600 | -1.10554500 |
| O  | 1.15274300  | -1.56807400 | -1.47366000 |
| O  | 2.17128800  | 0.58886700  | 0.42021800  |
| C  | 2.90555500  | 0.04700600  | 1.31156500  |
| O  | 2.63937500  | -1.01976200 | 1.94226500  |
| C  | -1.08719700 | 1.16276500  | 3.84117900  |
| C  | -2.32716500 | 0.38714900  | 4.37424300  |

|    |             |             |             |
|----|-------------|-------------|-------------|
| H  | -1.95986100 | -0.49247700 | 4.91874100  |
| H  | -2.81516100 | 1.03927200  | 5.11329500  |
| C  | -3.31732100 | -0.06360800 | 3.33370800  |
| C  | -3.17167300 | -1.32890200 | 2.75799500  |
| C  | -4.39711500 | 0.72807600  | 2.92457000  |
| C  | -4.05498800 | -1.81484900 | 1.79010500  |
| H  | -2.34745100 | -1.96395900 | 3.08455400  |
| C  | -5.29409800 | 0.26122700  | 1.96427700  |
| H  | -4.54987800 | 1.70770200  | 3.38069600  |
| C  | -5.12180100 | -1.00006400 | 1.39596900  |
| H  | -6.14621900 | 0.86821100  | 1.65939400  |
| H  | -5.84445600 | -1.36489400 | 0.66329200  |
| C  | -2.94094300 | -3.20598900 | -0.07199200 |
| C  | -3.82622900 | -3.18120300 | 1.20568100  |
| H  | -4.78281700 | -3.65600100 | 0.94351000  |
| H  | -3.34619000 | -3.81980300 | 1.95857700  |
| C  | 4.22652700  | 0.74555800  | 1.63895500  |
| C  | 2.27528700  | -3.54040400 | -2.20971200 |
| C  | 5.12462100  | 0.70633000  | 0.37440200  |
| H  | 4.67472400  | 1.36364700  | -0.38301400 |
| H  | 6.08891100  | 1.15535900  | 0.65442300  |
| C  | 3.52413900  | -2.81056400 | -2.77637600 |
| C  | 5.32322300  | -0.66224900 | -0.21353800 |
| C  | 4.42293300  | -1.12275900 | -1.17500700 |
| C  | 6.36988500  | -1.50187000 | 0.17784100  |
| C  | 4.53901500  | -2.38910200 | -1.75116800 |
| H  | 3.61625500  | -0.46864000 | -1.50106700 |
| C  | 6.50167700  | -2.76853500 | -0.38603900 |
| H  | 7.09423900  | -1.15507300 | 0.91618400  |
| C  | 5.59350700  | -3.21229800 | -1.34437200 |
| H  | 7.32782800  | -3.41106100 | -0.08498400 |
| H  | 5.71364500  | -4.19894200 | -1.79384200 |
| O  | 0.26183200  | 1.29266200  | -4.00707500 |
| S  | 0.94721900  | 1.42027400  | -2.73147400 |
| O  | 2.25917200  | 0.82214400  | -2.53387000 |
| N  | -0.07514900 | 1.12598000  | -1.49129700 |
| O  | 1.18340100  | 3.08752300  | -2.63233800 |
| C  | 2.23496700  | 3.55956200  | -1.82286300 |
| H  | 2.77590000  | 2.73976100  | -1.33091100 |
| H  | 2.93035700  | 4.12309100  | -2.45664100 |
| C  | 1.70667600  | 4.50904100  | -0.74667000 |
| Cl | 0.65592500  | 5.75378400  | -1.48115100 |
| Cl | 3.12693900  | 5.29756800  | 0.00806500  |
| Cl | 0.79035800  | 3.60584600  | 0.48471900  |
| C  | -1.66229300 | 2.41580100  | -1.91937700 |
| C  | -2.74754400 | 2.16971500  | -1.09334900 |
| H  | -1.67925800 | 2.09283700  | -2.95527200 |
| H  | -1.04244600 | 3.28456700  | -1.71149700 |
| C  | -2.87306700 | 2.87261500  | 0.20978300  |
| C  | -3.81666100 | 1.17797700  | -1.42463100 |
| H  | -3.56866500 | 3.72292600  | 0.13568100  |
| H  | -1.91087100 | 3.26050100  | 0.55507400  |
| H  | -3.28363900 | 2.20004700  | 0.97533000  |
| C  | -5.21846300 | 1.76540400  | -1.20853600 |
| C  | -3.72722900 | 0.56373500  | -2.81728300 |
| H  | -3.70521100 | 0.36053400  | -0.68393900 |
| H  | -5.38471500 | 2.58143400  | -1.93185200 |
| H  | -5.33812600 | 2.19558700  | -0.20906000 |
| C  | -6.30126300 | 0.72898700  | -1.40669700 |
| C  | -4.91462700 | -0.27674700 | -3.14766200 |
| H  | -3.63300500 | 1.35994100  | -3.57702700 |
| H  | -2.80670600 | -0.03273300 | -2.91061100 |
| C  | -6.09445200 | -0.24674900 | -2.49429500 |
| O  | -7.31488100 | 0.71877400  | -0.71741300 |
| H  | -4.79124100 | -0.98963400 | -3.96740300 |
| C  | -7.22545800 | -1.17506400 | -2.78781800 |
| H  | -8.14129700 | -0.62507600 | -3.03538200 |
| H  | -6.98665100 | -1.85234000 | -3.61444500 |
| H  | -7.47126100 | -1.77811500 | -1.90415200 |
| C  | -3.69590500 | -2.62350900 | -1.25404300 |
| H  | -3.06800700 | -2.57922400 | -2.15201800 |
| H  | -4.57562300 | -3.24077900 | -1.48081900 |
| H  | -4.04543300 | -1.61032100 | -1.04253500 |
| C  | -2.53599300 | -4.65241100 | -0.36432800 |
| H  | -3.43226500 | -5.26172400 | -0.53499100 |
| H  | -1.91441600 | -4.71558400 | -1.26604300 |
| H  | -1.97343500 | -5.08531700 | 0.46818000  |
| C  | -1.47970200 | 2.57256000  | 3.42570800  |
| H  | -1.79356300 | 3.13911100  | 4.31147600  |
| H  | -0.64195800 | 3.10829200  | 2.96409600  |
| H  | -2.30862600 | 2.57195000  | 2.71490700  |
| C  | -0.03842700 | 1.23180600  | 4.95518000  |
| H  | 0.84341600  | 1.80024600  | 4.63332600  |

## ARTICLE

## Journal Name

|   |             |             |             |
|---|-------------|-------------|-------------|
| H | -0.45991300 | 1.74168000  | 5.83049500  |
| H | 0.29054400  | 0.23315800  | 5.25695300  |
| C | 3.93455700  | 2.20411700  | 1.98944500  |
| H | 3.29751900  | 2.28457600  | 2.87963200  |
| H | 4.87102900  | 2.73602400  | 2.19943500  |
| H | 3.42548400  | 2.71668100  | 1.16780900  |
| C | 4.91856000  | 0.05159300  | 2.80734200  |
| H | 5.85818600  | 0.57141200  | 3.03547800  |
| H | 4.29356900  | 0.06757600  | 3.70670600  |
| H | 5.14759400  | -0.99425100 | 2.58179900  |
| C | 1.25056500  | -3.68533900 | -3.33670100 |
| H | 1.68312400  | -4.26604200 | -4.16075300 |
| H | 0.35239300  | -4.21460700 | -2.99446400 |
| H | 0.94568600  | -2.70745400 | -3.72336200 |
| C | 2.66001300  | -4.90766900 | -1.65615800 |
| H | 1.79019500  | -5.43289600 | -1.24596300 |
| H | 3.08195400  | -5.52276900 | -2.46162800 |
| H | 3.40336900  | -4.82552100 | -0.85705600 |
| H | 3.17578800  | -1.92422300 | -3.32293100 |
| H | 3.97544600  | -3.48997400 | -3.51441300 |

E-<sup>1</sup>TS<sub>1</sub>

|    |             |             |             |
|----|-------------|-------------|-------------|
| Rh | 1.13076900  | 1.83906900  | -1.80189500 |
| Rh | 0.42543300  | 0.50459400  | 0.06451700  |
| O  | 2.98593700  | 0.93930900  | -1.72421800 |
| C  | 3.17654400  | 0.05865300  | -0.83132100 |
| O  | 2.32468400  | -0.33356900 | 0.03067100  |
| O  | 1.78151600  | 3.29955600  | -0.51422000 |
| C  | 1.61927900  | 3.11002200  | 0.73144300  |
| O  | 1.09069000  | 2.08195400  | 1.26320900  |
| O  | -1.43708900 | 1.42487300  | -0.03014000 |
| C  | -1.61078600 | 2.33573600  | -0.90369600 |
| O  | -0.75997500 | 2.71108500  | -1.76798300 |
| O  | 0.46592200  | 0.28352300  | -3.02543100 |
| C  | -0.04865100 | -0.74814300 | -2.49610700 |
| O  | -0.21568900 | -0.92510800 | -1.24542300 |
| C  | 4.53811900  | -0.63354200 | -0.77121200 |
| C  | 5.09640300  | -0.49935500 | 0.67076800  |
| H  | 4.42310900  | -1.04267900 | 1.34789900  |
| H  | 6.06667300  | -1.01743000 | 0.68609300  |
| C  | 5.24949900  | 0.91993200  | 1.13877900  |
| C  | 4.17834600  | 1.56201000  | 1.76560500  |
| C  | 6.42741000  | 1.64144400  | 0.92276700  |
| C  | 4.24577400  | 2.90636400  | 2.14223000  |
| H  | 3.26989300  | 0.99600700  | 1.97162500  |
| C  | 6.52175200  | 2.97305500  | 1.31701200  |
| H  | 7.27835600  | 1.15029700  | 0.44880400  |
| C  | 5.43533300  | 3.60503400  | 1.91516300  |
| H  | 7.44845600  | 3.52217700  | 1.15631600  |
| H  | 5.51055900  | 4.65011200  | 2.21874200  |
| C  | 2.07642700  | 4.20402600  | 1.69605100  |
| C  | 3.03842200  | 3.57304800  | 2.73829800  |
| H  | 3.34179900  | 4.38137000  | 3.41987000  |
| H  | 2.46807600  | 2.84610800  | 3.33067800  |
| C  | -0.51098200 | -1.87392100 | -3.41690600 |
| C  | -2.96923400 | 3.03824900  | -0.92232200 |
| C  | -1.57496100 | -1.29549100 | -4.38837000 |
| H  | -1.07938200 | -0.56303500 | -5.03886600 |
| H  | -1.90564200 | -2.12559700 | -5.02950800 |
| C  | -3.62060300 | 2.77990800  | -2.30756900 |
| H  | -4.61084900 | 3.25696800  | -2.28752300 |
| H  | -3.02371900 | 3.30411900  | -3.06518700 |
| C  | -2.74813300 | -0.65639300 | -3.69950800 |
| C  | -2.71164800 | 0.70439800  | -3.38270500 |
| C  | -3.87003000 | -1.39814000 | -3.31378500 |
| C  | -3.74262400 | 1.32748100  | -2.67343300 |
| H  | -1.85055400 | 1.29733200  | -3.69394000 |
| C  | -4.91070100 | -0.79118200 | -2.61562300 |
| H  | -3.92830900 | -2.45614200 | -3.57199400 |
| C  | -4.84843800 | 0.56179200  | -2.28879500 |
| H  | -5.78537700 | -1.37215800 | -2.32441700 |
| H  | -5.66731400 | 1.01761000  | -1.73057600 |
| O  | -0.22940400 | -2.49745200 | 3.27215200  |
| S  | 0.61696100  | -1.68512400 | 2.40373400  |
| O  | 1.84767700  | -1.11504900 | 2.93575800  |
| N  | -0.21913500 | -0.50201700 | 1.67835500  |
| C  | 1.70964300  | -3.87998400 | 1.58436800  |
| H  | 2.80079600  | -3.75203200 | 1.53522500  |
| O  | 1.04831700  | -2.71583100 | 1.13720600  |
| H  | 1.42126800  | -4.13926400 | 2.61175000  |
| C  | 1.32743400  | -5.05614200 | 0.69669800  |
| Cl | -0.43748900 | -5.32324600 | 0.73594500  |
| Cl | 2.16951700  | -6.49578900 | 1.34137500  |

|    |             |             |             |
|----|-------------|-------------|-------------|
| Cl | 1.84791300  | -4.77423800 | -0.98778600 |
| C  | -5.72723500 | 0.57153400  | 3.73040200  |
| C  | -4.78174800 | -0.57963500 | 3.63771400  |
| C  | -6.39240600 | 1.09825300  | 2.68187600  |
| H  | -5.88625100 | 1.00318600  | 4.72140300  |
| C  | -4.19908800 | -0.71057100 | 2.23626400  |
| H  | -5.32040200 | -1.50338900 | 3.91389500  |
| H  | -3.97899700 | -0.47863500 | 4.38060000  |
| C  | -6.25669000 | 0.48557900  | 1.34424000  |
| C  | -7.31518300 | 2.26599700  | 2.78995200  |
| C  | -3.27684700 | -1.88546500 | 2.02919000  |
| C  | -5.34564200 | -0.71793800 | 1.21824700  |
| H  | -3.60119200 | 0.19824400  | 2.04599700  |
| O  | -6.88754200 | 0.91218800  | 0.38342700  |
| H  | -8.31936800 | 2.00833000  | 2.43314000  |
| H  | -7.38791300 | 2.62906500  | 3.82019600  |
| H  | -6.97637200 | 3.09295600  | 2.15356800  |
| C  | -3.23724000 | -2.96511000 | 2.84429500  |
| H  | -5.95857700 | -1.62163500 | 1.37563300  |
| H  | -4.98619300 | -0.76819700 | 0.18174800  |
| H  | -3.88460000 | -3.06857000 | 3.71261900  |
| H  | -2.52614800 | -3.76836500 | 2.67002100  |
| C  | -2.35784900 | -1.79006600 | 0.90855000  |
| H  | -1.41110800 | -1.10103600 | 1.31632500  |
| H  | -1.87198000 | -2.71737300 | 0.59127500  |
| H  | -2.67342300 | -1.16615300 | 0.06244700  |
| C  | 4.30429200  | -2.11701800 | -1.06528300 |
| H  | 3.91302500  | -2.26869200 | -2.07995400 |
| H  | 5.24685600  | -2.67288400 | -0.98357500 |
| H  | 3.58189300  | -2.54124300 | -0.36096600 |
| C  | 5.49511800  | -0.03343300 | -1.79346400 |
| H  | 6.46535900  | -0.54382200 | -1.73450700 |
| H  | 5.10933500  | -0.14818200 | -2.81166600 |
| H  | 5.65732800  | 1.03485200  | -1.61881300 |
| C  | 0.83758400  | 4.72805500  | 2.42918300  |
| H  | 1.13477500  | 5.48766900  | 3.16287100  |
| H  | 0.13341700  | 5.19870500  | 1.73170200  |
| H  | 0.31655200  | 3.92212100  | 2.95623000  |
| C  | 2.75694700  | 5.33862600  | 0.93994800  |
| H  | 2.07681200  | 5.79463900  | 0.21340800  |
| H  | 3.07235000  | 6.11486700  | 1.64927300  |
| H  | 3.64080300  | 4.99049400  | 0.39628400  |
| C  | -2.73723600 | 4.54186800  | -0.75802100 |
| H  | -3.69267600 | 5.07587400  | -0.83269000 |
| H  | -2.30463600 | 4.77126600  | 0.22376700  |
| H  | -2.06188900 | 4.92621500  | -1.52903500 |
| C  | -3.86564000 | 2.51773000  | 0.19368700  |
| H  | -3.42712700 | 2.70276000  | 1.18120700  |
| H  | -4.84645200 | 3.00832900  | 0.14920100  |
| H  | -4.02769800 | 1.43926600  | 0.09488800  |
| C  | -1.08511500 | -3.03296300 | -2.60835900 |
| H  | -1.35981700 | -3.85411100 | -3.28326500 |
| H  | -0.35663900 | -3.41268300 | -1.88509000 |
| H  | -1.97981300 | -2.73639000 | -2.05127300 |
| C  | 0.70174900  | -2.34756200 | -4.22287300 |
| H  | 1.46755700  | -2.77746200 | -3.56423500 |
| H  | 0.39690600  | -3.12724400 | -4.93177500 |
| H  | 1.15443300  | -1.52391800 | -4.78445700 |

**E<sup>-3</sup>TS<sub>1</sub>**

|    |             |             |             |
|----|-------------|-------------|-------------|
| Rh | 1.07498900  | -2.24808700 | 1.37988000  |
| Rh | 0.39195500  | -0.36577300 | 0.06936700  |
| O  | 2.89663300  | -1.33338000 | 1.66252200  |
| C  | 3.11655100  | -0.21246500 | 1.11110200  |
| O  | 2.28265600  | 0.43832700  | 0.39761900  |
| O  | 1.79569800  | -3.14457600 | -0.33661100 |
| C  | 1.62436200  | -2.54200800 | -1.44057800 |
| O  | 1.04624900  | -1.41648300 | -1.59284900 |
| O  | -1.44306400 | -1.28716600 | -0.15269300 |
| C  | -1.62908200 | -2.45084200 | 0.32809200  |
| O  | -0.78651300 | -3.10918000 | 1.01452900  |
| O  | 0.36742300  | -1.24168200 | 3.05929300  |
| C  | -0.10326400 | -0.06926900 | 2.92444800  |
| O  | -0.23567000 | 0.55696900  | 1.82391100  |
| C  | 4.47634000  | 0.44597200  | 1.33216200  |
| C  | 5.05026800  | 0.87894800  | -0.04226800 |
| C  | 5.22486000  | -0.25594500 | -1.01366800 |
| C  | 4.16305300  | -0.64703400 | -1.83511500 |
| C  | 6.41844700  | -0.98265400 | -1.07514300 |
| C  | 4.25326700  | -1.76331500 | -2.67144900 |
| H  | 3.23987000  | -0.06795700 | -1.83231500 |
| C  | 6.53666700  | -2.07674600 | -1.92708100 |
| H  | 7.26191100  | -0.68344700 | -0.45146100 |

|    |             |             |             |
|----|-------------|-------------|-------------|
| C  | 5.45782300  | -2.47201300 | -2.71198400 |
| H  | 7.47501700  | -2.62722600 | -1.97620800 |
| H  | 5.54965800  | -3.33619800 | -3.37124200 |
| C  | 2.12734400  | -3.20226700 | -2.72342300 |
| C  | 3.05565000  | -2.20186000 | -3.46544000 |
| H  | 3.37336400  | -2.69793800 | -4.39429600 |
| H  | 2.45632600  | -1.32807800 | -3.75045600 |
| C  | -0.55888100 | 0.64470200  | 4.19632500  |
| C  | -2.99028400 | -3.09155400 | 0.05869100  |
| C  | -1.68956400 | -0.20679500 | 4.83401700  |
| H  | -1.24662900 | -1.14512400 | 5.19204900  |
| H  | -2.04228700 | 0.34248400  | 5.71901600  |
| C  | -3.72780900 | -3.24142200 | 1.41729200  |
| H  | -4.72940400 | -3.63415200 | 1.19170600  |
| H  | -3.20471200 | -4.00863800 | 2.00357600  |
| C  | -2.82989500 | -0.50676700 | 3.90342500  |
| C  | -2.81887100 | -1.68049500 | 3.14617900  |
| C  | -3.89577000 | 0.38250900  | 3.73386100  |
| C  | -3.82362400 | -1.97532300 | 2.22063900  |
| H  | -1.99924000 | -2.38872300 | 3.27915700  |
| C  | -4.90493300 | 0.10541300  | 2.81554100  |
| H  | -3.93705200 | 1.29311700  | 4.33255800  |
| C  | -4.87112300 | -1.06243100 | 2.05559700  |
| H  | -5.73423900 | 0.80148900  | 2.69246700  |
| H  | -5.66508400 | -1.26062600 | 1.33321900  |
| O  | -1.15336400 | 1.96560100  | -3.21359200 |
| S  | 0.05000400  | 1.80243400  | -2.41581500 |
| O  | 1.25276500  | 1.19918100  | -2.97120800 |
| N  | -0.28840200 | 1.19358800  | -0.96439600 |
| C  | 1.72986800  | 3.60403000  | -1.53413400 |
| H  | 2.24147300  | 2.66090900  | -1.29727800 |
| O  | 0.43049200  | 3.39302900  | -2.04592300 |
| H  | 2.32330800  | 4.15518100  | -2.27412100 |
| C  | 1.66176800  | 4.43813300  | -0.26004000 |
| Cl | 0.79680100  | 5.96696600  | -0.55577800 |
| Cl | 3.36012500  | 4.79211000  | 0.20889000  |
| Cl | 0.84941900  | 3.52694600  | 1.03608400  |
| C  | -5.39317800 | 0.93775600  | -3.69538000 |
| C  | -4.54925900 | 2.01385900  | -3.09806300 |
| C  | -6.09417600 | 0.02991100  | -2.98408400 |
| H  | -5.43686800 | 0.89134000  | -4.78626500 |
| C  | -4.09746200 | 1.64166900  | -1.69270400 |
| H  | -5.13243900 | 2.95197700  | -3.07566200 |
| H  | -3.67867200 | 2.21983500  | -3.73349400 |
| C  | -6.11752600 | 0.11399400  | -1.51012800 |
| C  | -6.89859700 | -1.06402900 | -3.60411800 |
| C  | -3.28577500 | 2.68590500  | -0.96760200 |
| C  | -5.32058300 | 1.22936300  | -0.86657600 |
| H  | -3.44839000 | 0.75261600  | -1.78804700 |
| O  | -6.78300000 | -0.66704400 | -0.83734500 |
| H  | -7.94648300 | -1.01518000 | -3.28539100 |
| H  | -6.85935600 | -1.02328700 | -4.69749200 |
| H  | -6.53427600 | -2.04756400 | -3.28115000 |
| C  | -3.23764100 | 3.99254100  | -1.33851900 |
| H  | -5.98888700 | 2.10025000  | -0.75578400 |
| H  | -5.05202800 | 0.91758000  | 0.15123300  |
| H  | -3.78441300 | 4.37916400  | -2.19532900 |
| H  | -2.61505900 | 4.70182400  | -0.79494500 |
| C  | -2.47180100 | 2.20417100  | 0.12391800  |
| H  | -1.40283800 | 1.75665800  | -0.42796800 |
| H  | -2.07809500 | 2.95422100  | 0.81490600  |
| H  | -2.79528200 | 1.28164300  | 0.62329500  |
| C  | 2.85806400  | -4.50149600 | -2.40677300 |
| H  | 2.19843000  | -5.21579500 | -1.90342600 |
| H  | 3.21268400  | -4.96004100 | -3.33901400 |
| H  | 3.72274800  | -4.33209500 | -1.75717400 |
| C  | 0.91083100  | -3.48154400 | -3.61224400 |
| H  | 1.23915500  | -3.93276300 | -4.55675600 |
| H  | 0.21950500  | -4.18545400 | -3.13202000 |
| H  | 0.36591300  | -2.55944300 | -3.84060900 |
| C  | -2.76681200 | -4.48212900 | -0.53787700 |
| H  | -3.73190400 | -4.98305200 | -0.68243400 |
| H  | -2.27575100 | -4.41959400 | -1.51664100 |
| H  | -2.14722300 | -5.10199600 | 0.11787600  |
| C  | -3.80977300 | -2.22863600 | -0.89369200 |
| H  | -3.31358000 | -2.11613800 | -1.86507700 |
| H  | -4.79624800 | -2.68082200 | -1.05451900 |
| H  | -3.96446100 | -1.22545800 | -0.48222400 |
| C  | -1.04949700 | 2.05445500  | 3.88763500  |
| H  | -1.39780400 | 2.53495500  | 4.81103000  |
| H  | -0.24499400 | 2.67138500  | 3.47226500  |
| H  | -1.87364000 | 2.05251000  | 3.16688400  |
| C  | 0.62430200  | 0.70313800  | 5.16551800  |



|   |            |             |             |
|---|------------|-------------|-------------|
| H | 1.43613300 | 1.32120000  | 4.76175100  |
| H | 0.30675900 | 1.15205700  | 6.11481800  |
| H | 1.02073100 | -0.29658000 | 5.36911900  |
| H | 6.01453100 | 1.36983800  | 0.15501400  |
| H | 4.38424200 | 1.64325200  | -0.46506400 |
| C | 4.24387500 | 1.69049900  | 2.19551200  |
| H | 3.86868200 | 1.41377900  | 3.18866500  |
| H | 5.18919700 | 2.23010500  | 2.33522800  |
| H | 3.52508400 | 2.37494800  | 1.73264700  |
| C | 5.42625100 | -0.50964800 | 2.04557400  |
| H | 6.39824700 | -0.02020000 | 2.18948500  |
| H | 5.03769600 | -0.79354500 | 3.02870500  |
| H | 5.58621800 | -1.42841100 | 1.47269300  |

E-<sup>3</sup>IM<sub>A,S</sub>

|    |             |             |             |
|----|-------------|-------------|-------------|
| Rh | 0.72935400  | -2.32849200 | 1.44883700  |
| Rh | 0.21315000  | -0.43005900 | 0.07641800  |
| O  | 2.56899400  | -1.49234500 | 1.82758800  |
| C  | 2.89274600  | -0.41670900 | 1.24071200  |
| O  | 2.14700300  | 0.24678900  | 0.44513600  |
| O  | 1.49162400  | -3.26996600 | -0.21744300 |
| C  | 1.32922500  | -2.71733700 | -1.34992300 |
| O  | 0.79312200  | -1.58034800 | -1.55219500 |
| O  | -1.66943500 | -1.25522700 | -0.19552400 |
| C  | -1.90185200 | -2.43222000 | 0.22998100  |
| O  | -1.12171300 | -3.11766300 | 0.96344900  |
| O  | -0.04185000 | -1.29075000 | 3.09079300  |
| C  | -0.35264200 | -0.07132000 | 2.92305600  |
| O  | -0.31283200 | 0.55959800  | 1.81874100  |
| C  | 4.27717000  | 0.16466000  | 1.51212300  |
| C  | 4.98175700  | 0.41624800  | 0.15215000  |
| H  | 4.43339300  | 1.20731900  | -0.37820800 |
| H  | 5.97919600  | 0.82057700  | 0.37901600  |
| C  | 5.08929800  | -0.80163400 | -0.72392900 |
| C  | 4.05067100  | -1.11642700 | -1.60503200 |
| C  | 6.19323200  | -1.65803000 | -0.65945700 |
| C  | 4.07972400  | -2.26928500 | -2.39401400 |
| H  | 3.20003900  | -0.44052300 | -1.69125400 |
| C  | 6.24692900  | -2.80031700 | -1.45341800 |
| H  | 7.02097700  | -1.41966600 | 0.00999700  |
| C  | 5.19460800  | -3.10860300 | -2.31044300 |
| H  | 7.11751900  | -3.45263700 | -1.40624700 |
| H  | 5.24011600  | -4.00464800 | -2.93068500 |
| C  | 1.80916200  | -3.45750600 | -2.59607500 |
| C  | 2.90823800  | -2.59553500 | -3.27657400 |
| H  | 3.23838500  | -3.15137300 | -4.16639200 |
| H  | 2.43995900  | -1.66682900 | -3.62717700 |
| C  | -0.85192000 | 0.70875700  | 4.13727400  |
| C  | -3.24850600 | -3.05175200 | -0.13872800 |
| C  | -2.21566300 | 0.09330100  | 4.55817600  |
| H  | -2.01296900 | -0.87818900 | 5.02797100  |
| H  | -2.62981200 | 0.74584200  | 5.34050100  |
| C  | -4.16494800 | -2.94648900 | 1.11465700  |
| H  | -5.17558700 | -3.23944400 | 0.79510500  |
| H  | -3.82711300 | -3.69780500 | 1.84118300  |
| C  | -3.20959400 | -0.10116600 | 3.44632300  |
| C  | -3.27680900 | -1.34093900 | 2.80671500  |
| C  | -4.08009900 | 0.90987600  | 3.02297300  |
| C  | -4.17813900 | -1.59573000 | 1.77065200  |
| H  | -2.60738800 | -2.13967600 | 3.13213900  |
| C  | -4.98784600 | 0.67558300  | 1.99178300  |
| H  | -4.06684800 | 1.87746000  | 3.52645600  |
| C  | -5.03774600 | -0.56950700 | 1.36770500  |
| H  | -5.68554600 | 1.45172900  | 1.67905200  |
| H  | -5.77387900 | -0.74758300 | 0.58237800  |
| O  | -0.52070500 | 2.13736300  | -3.37536100 |
| S  | 0.40759700  | 1.79263100  | -2.31470800 |
| O  | 1.55520900  | 0.94118200  | -2.56489000 |
| N  | -0.37183100 | 1.25632100  | -0.97457400 |
| C  | 2.29164400  | 3.28574100  | -1.28164800 |
| H  | 2.49519900  | 2.35516200  | -0.73161000 |
| O  | 0.99643700  | 3.29241700  | -1.85411000 |
| H  | 3.04861500  | 3.41362300  | -2.06625100 |
| C  | 2.39469400  | 4.45460200  | -0.31251500 |
| Cl | 1.91914600  | 5.97521300  | -1.10094200 |
| Cl | 4.10336600  | 4.55595500  | 0.21359100  |
| Cl | 1.34703700  | 4.16023700  | 1.10972800  |
| C  | -4.82265200 | 0.33781000  | -3.24977400 |
| C  | -3.58962500 | 1.12393600  | -2.96250100 |
| C  | -5.96778100 | 0.40636800  | -2.53870800 |
| H  | -4.76547100 | -0.37906000 | -4.07415700 |
| C  | -3.59973200 | 1.70983200  | -1.54238900 |
| H  | -3.47174100 | 1.93360500  | -3.70353800 |

|   |             |             |             |
|---|-------------|-------------|-------------|
| H | -2.70084200 | 0.49190200  | -3.09979600 |
| C | -6.08540300 | 1.37594200  | -1.43109100 |
| C | -7.14304900 | -0.48140100 | -2.78313000 |
| C | -2.46178800 | 2.63622100  | -1.26460100 |
| C | -4.96032700 | 2.37422000  | -1.29237100 |
| H | -3.51800800 | 0.85585600  | -0.84713200 |
| O | -7.05048200 | 1.37148200  | -0.67338500 |
| H | -8.04924500 | 0.09992400  | -2.99242900 |
| H | -6.96316400 | -1.16519000 | -3.61961100 |
| H | -7.37288200 | -1.07716400 | -1.89007300 |
| H | -5.11272600 | 3.17902100  | -2.03068100 |
| H | -5.01480500 | 2.83597400  | -0.29932800 |
| C | -1.38339400 | 2.16411100  | -0.36116900 |
| H | -0.84272100 | 3.01166500  | 0.08728300  |
| H | -1.80406100 | 1.56888500  | 0.45818000  |
| C | -2.42396900 | 3.99541800  | -1.86435400 |
| H | -2.61138200 | 3.97346000  | -2.94815800 |
| H | -3.19379500 | 4.65497800  | -1.42958600 |
| H | -1.45193500 | 4.47891300  | -1.71323000 |
| C | 0.62550300  | -3.58022900 | -3.56053400 |
| H | 0.94449300  | -4.08917200 | -4.47846500 |
| H | -0.18855900 | -4.16972700 | -3.11973900 |
| H | 0.23070400  | -2.59490700 | -3.82850000 |
| C | 2.33838700  | -4.83845500 | -2.22934300 |
| H | 1.55729900  | -5.45076400 | -1.76578200 |
| H | 2.68332100  | -5.35324800 | -3.13539800 |
| H | 3.17331700  | -4.78053500 | -1.52442400 |
| C | 4.07430100  | 1.50056100  | 2.23305600  |
| H | 3.60324400  | 1.35380300  | 3.21369100  |
| H | 5.04115900  | 1.99311300  | 2.39562200  |
| H | 3.44073200  | 2.17788900  | 1.65039600  |
| C | 5.09888500  | -0.78129100 | 2.38004100  |
| H | 6.08766500  | -0.34229000 | 2.56529700  |
| H | 4.61500600  | -0.95486900 | 3.34645400  |
| H | 5.23950200  | -1.75469700 | 1.89942300  |
| C | -3.86949900 | -2.30651300 | -1.31328900 |
| H | -3.21231300 | -2.32251300 | -2.19190100 |
| H | -4.82387500 | -2.77340200 | -1.59088100 |
| H | -4.06388900 | -1.25861300 | -1.06852900 |
| C | -3.05927700 | -4.52789400 | -0.48480300 |
| H | -4.03511200 | -4.98806900 | -0.68278400 |
| H | -2.44534800 | -4.65124200 | -1.38474000 |
| H | -2.57793500 | -5.07372400 | 0.33184800  |
| C | -1.00847600 | 2.18865500  | 3.80303000  |
| H | -1.34906500 | 2.73272700  | 4.69310200  |
| H | -0.05504900 | 2.62372300  | 3.48240100  |
| H | -1.73422200 | 2.35374400  | 2.99966500  |
| C | 0.14279000  | 0.53037000  | 5.28530100  |
| H | 1.11222600  | 0.98455100  | 5.04564100  |
| H | -0.23847500 | 1.01956800  | 6.19018900  |
| H | 0.30759700  | -0.52869400 | 5.50637600  |

E-<sup>3</sup>IMA-R

|    |             |             |             |
|----|-------------|-------------|-------------|
| Rh | -0.64811400 | 0.36320700  | -0.17122200 |
| Rh | -2.58314500 | 1.55727500  | 0.60185900  |
| O  | 0.25723100  | 0.78135900  | 1.65447000  |
| C  | -0.37974200 | 1.46456600  | 2.51824900  |
| O  | -1.56032700 | 1.91304700  | 2.38213700  |
| O  | 0.05254200  | 2.17745600  | -0.93682800 |
| C  | -0.68162200 | 3.21341900  | -0.84750800 |
| O  | -1.81171000 | 3.26769900  | -0.27040700 |
| O  | -3.52030500 | 1.13156100  | -1.18271200 |
| C  | -2.86825000 | 0.50171900  | -2.07192100 |
| O  | -1.66992800 | 0.08633900  | -1.95596400 |
| O  | -1.49051400 | -1.34203600 | 0.70725900  |
| C  | -2.62186500 | -1.24664500 | 1.28942700  |
| O  | -3.30461400 | -0.18369300 | 1.40626900  |
| C  | 0.32915600  | 1.76388600  | 3.83905900  |
| C  | 0.31521800  | 3.29945400  | 4.06110700  |
| H  | -0.72817000 | 3.61920400  | 4.17798300  |
| H  | 0.82043500  | 3.48758500  | 5.01969800  |
| C  | 0.96815700  | 4.08312600  | 2.95741100  |
| C  | 0.20362100  | 4.52356700  | 1.87424000  |
| C  | 2.34008700  | 4.35492300  | 2.95710400  |
| C  | 0.77457900  | 5.19822300  | 0.79193600  |
| H  | -0.87059600 | 4.33812100  | 1.87377600  |
| C  | 2.92411800  | 5.03989900  | 1.89548400  |
| H  | 2.95108100  | 4.03600400  | 3.80221800  |
| C  | 2.14859500  | 5.45449500  | 0.81633300  |
| H  | 3.99064100  | 5.25831700  | 1.91214700  |
| H  | 2.60950300  | 5.99424700  | -0.01163100 |
| C  | -0.17658100 | 4.50702600  | -1.48684200 |
| C  | -0.08449800 | 5.58814500  | -0.37710300 |

|    |             |             |             |
|----|-------------|-------------|-------------|
| H  | 0.29981400  | 6.50204400  | -0.85288000 |
| H  | -1.10311800 | 5.80780600  | -0.03189400 |
| C  | -3.18188800 | -2.52176300 | 1.91659700  |
| C  | -3.55166300 | 0.20761500  | -3.40537800 |
| C  | -3.25778000 | -3.61744700 | 0.82173600  |
| H  | -2.23414200 | -3.85201300 | 0.49636100  |
| H  | -3.65760100 | -4.52268000 | 1.30165100  |
| C  | -3.55789700 | -1.33057600 | -3.61943200 |
| C  | -4.09125900 | -3.23408700 | -0.36952700 |
| C  | -3.50024100 | -2.53897600 | -1.42761000 |
| C  | -5.45828100 | -3.51857200 | -0.43639100 |
| C  | -4.24166100 | -2.11045300 | -2.53154600 |
| H  | -2.42867400 | -2.34565100 | -1.40359900 |
| C  | -6.20945800 | -3.11021000 | -1.53520100 |
| H  | -5.93390200 | -4.07180100 | 0.37454700  |
| C  | -5.60762900 | -2.40605100 | -2.57460800 |
| H  | -7.27107400 | -3.34755000 | -1.58406100 |
| H  | -6.19926900 | -2.09349300 | -3.43602500 |
| O  | 2.02754200  | -1.89473500 | -2.79950600 |
| S  | 1.12319900  | -1.93460200 | -1.66570300 |
| O  | -0.24060800 | -2.40988700 | -1.80299800 |
| N  | 1.10518200  | -0.52827700 | -0.82797600 |
| O  | 1.92067800  | -3.00793700 | -0.64233800 |
| C  | 1.13304100  | -3.79522600 | 0.22400500  |
| H  | 0.09417700  | -3.43935000 | 0.27208300  |
| H  | 1.14440200  | -4.83557200 | -0.12610100 |
| C  | 1.72485800  | -3.75580900 | 1.62867200  |
| Cl | 3.45651800  | -4.19208500 | 1.59685000  |
| Cl | 0.83333300  | -4.95817500 | 2.61074000  |
| Cl | 1.53191300  | -2.12265800 | 2.31663200  |
| C  | 2.40945700  | 0.06838400  | -0.43035600 |
| C  | 3.36026600  | 0.26881800  | -1.55664300 |
| H  | 2.83835000  | -0.54733900 | 0.37320100  |
| H  | 2.12116200  | 1.03003700  | 0.02192000  |
| C  | 2.93684700  | 1.16435500  | -2.66556300 |
| C  | 4.66024900  | -0.45865300 | -1.69745900 |
| H  | 3.33244800  | 2.18709000  | -2.54887800 |
| H  | 1.84387600  | 1.25095200  | -2.70671600 |
| H  | 3.29294700  | 0.79388300  | -3.63629100 |
| C  | 5.83909400  | 0.51929400  | -1.82337600 |
| C  | 4.97357800  | -1.47627800 | -0.60626100 |
| H  | 4.61118100  | -1.01991700 | -2.65030500 |
| H  | 5.93428900  | 1.09022000  | -0.88394600 |
| H  | 5.68712000  | 1.25667700  | -2.61987900 |
| C  | 7.16069100  | -0.17956000 | -2.07375100 |
| C  | 6.32735400  | -2.07796800 | -0.77629700 |
| H  | 4.91647200  | -1.00044700 | 0.39070300  |
| H  | 4.21305500  | -2.26811200 | -0.58913700 |
| C  | 7.33629400  | -1.51930700 | -1.47504700 |
| O  | 8.05950700  | 0.36082400  | -2.70486700 |
| H  | 6.49734700  | -3.04488300 | -0.29469400 |
| C  | 8.67021700  | -2.16238800 | -1.66268600 |
| H  | 9.47387700  | -1.51908300 | -1.28469800 |
| H  | 8.72584600  | -3.13180500 | -1.15669100 |
| H  | 8.88628100  | -2.31211800 | -2.72746100 |
| C  | 1.17597400  | 4.29879500  | -2.15536000 |
| H  | 1.11140400  | 3.55715800  | -2.95847300 |
| H  | 1.52116400  | 5.24465500  | -2.59231800 |
| H  | 1.93303900  | 3.95267100  | -1.44381000 |
| C  | -1.21027900 | 4.95444000  | -2.52493100 |
| H  | -0.89723800 | 5.90512400  | -2.97385700 |
| H  | -1.30294200 | 4.22019400  | -3.33465300 |
| H  | -2.19704000 | 5.09327300  | -2.07180600 |
| C  | 1.76079000  | 1.23893900  | 3.83152800  |
| H  | 2.26209900  | 1.52543600  | 4.76512900  |
| H  | 1.78855400  | 0.14667500  | 3.76363600  |
| H  | 2.33976700  | 1.64054900  | 2.99358500  |
| C  | -0.47030900 | 1.08793800  | 4.95696900  |
| H  | -0.47666300 | -0.00259100 | 4.83058200  |
| H  | -0.01242700 | 1.30644300  | 5.92961000  |
| H  | -1.50737100 | 1.43900300  | 4.97444400  |
| C  | -2.20338900 | -2.96211200 | 3.00715700  |
| H  | -2.14775300 | -2.21927700 | 3.81308700  |
| H  | -2.53168900 | -3.91151900 | 3.44829700  |
| H  | -1.19586800 | -3.10132300 | 2.60447300  |
| C  | -4.55727900 | -2.26835500 | 2.52396400  |
| H  | -4.93513800 | -3.19830700 | 2.96842400  |
| H  | -4.51006400 | -1.50971100 | 3.31164600  |
| H  | -5.27954700 | -1.92708500 | 1.77619600  |
| C  | -2.71664700 | 0.85131400  | -4.51664000 |
| H  | -3.15955500 | 0.62253700  | -5.49375400 |
| H  | -2.69172500 | 1.94331000  | -4.41235200 |
| H  | -1.68684600 | 0.47920300  | -4.50773400 |

|   |             |             |             |
|---|-------------|-------------|-------------|
| C | -4.96913500 | 0.76680100  | -3.42066800 |
| H | -4.97128700 | 1.85351900  | -3.28479300 |
| H | -5.44019000 | 0.54352700  | -4.38678900 |
| H | -5.58554000 | 0.33092200  | -2.62832600 |
| H | -2.51600700 | -1.66508300 | -3.70982000 |
| H | -4.04496900 | -1.51237600 | -4.58877500 |

**E-<sup>3</sup>IM<sub>1</sub>**

|    |             |             |             |
|----|-------------|-------------|-------------|
| Rh | 1.11287500  | -1.71102500 | 1.87830800  |
| Rh | 0.40543700  | -0.43684500 | -0.01641600 |
| O  | 2.94231600  | -0.77154300 | 1.80612000  |
| C  | 3.12752500  | 0.12720700  | 0.92853400  |
| O  | 2.26878900  | 0.50726200  | 0.06629500  |
| O  | 1.80461100  | -3.15514800 | 0.59189200  |
| C  | 1.67091300  | -2.97992500 | -0.65892000 |
| O  | 1.13479600  | -1.95924400 | -1.20169600 |
| O  | -1.42258000 | -1.41163600 | 0.06800900  |
| C  | -1.59299500 | -2.30597100 | 0.95971300  |
| O  | -0.74585300 | -2.63520100 | 1.84729400  |
| O  | 0.41078800  | -0.18947800 | 3.09233400  |
| C  | -0.12674700 | 0.83248300  | 2.56050700  |
| O  | -0.29646000 | 1.00338600  | 1.31043900  |
| C  | 4.48304400  | 0.83394400  | 0.89701300  |
| C  | 5.07969600  | 0.69757200  | -0.52929500 |
| H  | 4.41825500  | 1.22680800  | -1.22859200 |
| H  | 6.04095500  | 1.23182000  | -0.52206300 |
| C  | 5.26689100  | -0.72154200 | -0.98317500 |
| C  | 4.22188000  | -1.37817500 | -1.63824700 |
| C  | 6.44739100  | -1.42629200 | -0.72950900 |
| C  | 4.31858000  | -2.72281700 | -2.00758700 |
| H  | 3.31799400  | -0.81870600 | -1.88164300 |
| C  | 6.57114800  | -2.75698200 | -1.11788600 |
| H  | 7.27801000  | -0.92244100 | -0.23365800 |
| C  | 5.51071700  | -3.40467400 | -1.74507400 |
| H  | 7.50033800  | -3.29308700 | -0.93047300 |
| H  | 5.60976600  | -4.44887000 | -2.04484900 |
| C  | 2.16780200  | -4.06319300 | -1.61099000 |
| C  | 3.13828400  | -3.41064000 | -2.63280200 |
| H  | 3.47041000  | -4.21201700 | -3.30874600 |
| H  | 2.56673700  | -2.69341200 | -3.23590200 |
| C  | -0.60435000 | 1.93377500  | 3.50477100  |
| C  | -2.93010800 | -3.04560400 | 0.96551100  |
| C  | -1.68535700 | 1.32507300  | 4.44046700  |
| H  | -1.19484500 | 0.59077900  | 5.09258800  |
| H  | -2.04151800 | 2.14175000  | 5.08499200  |
| C  | -3.62142400 | -2.77713500 | 2.32904700  |
| H  | -4.60164600 | -3.27281800 | 2.28968500  |
| H  | -3.03686600 | -3.27833800 | 3.11159100  |
| C  | -2.83319500 | 0.67698300  | 3.71768700  |
| C  | -2.77306900 | -0.68357700 | 3.40470300  |
| C  | -3.95484600 | 1.40293600  | 3.30347200  |
| C  | -3.77669500 | -1.32195000 | 2.67096500  |
| H  | -1.91502700 | -1.26771000 | 3.74057900  |
| C  | -4.96859600 | 0.78177500  | 2.57805100  |
| H  | -4.03584400 | 2.46049600  | 3.55725100  |
| C  | -4.88060800 | -0.57018100 | 2.25231800  |
| H  | -5.83989700 | 1.35505000  | 2.26387700  |
| H  | -5.67732100 | -1.03986200 | 1.67234400  |
| O  | -0.31109500 | 1.45799900  | -4.00408700 |
| S  | 0.46199300  | 1.41654800  | -2.77916100 |
| O  | 1.85979200  | 1.03188100  | -2.75916200 |
| N  | -0.31310600 | 0.60275200  | -1.61070700 |
| C  | 0.90986300  | 3.21449800  | -0.96563400 |
| H  | 0.23889700  | 2.84604400  | -0.17474900 |
| O  | 0.34686200  | 2.99640500  | -2.24545100 |
| H  | 1.88247300  | 2.71217100  | -0.86858600 |
| C  | 1.10411700  | 4.70895700  | -0.78078800 |
| Cl | 2.25111000  | 5.35111300  | -1.97410800 |
| Cl | 1.75781200  | 4.95381100  | 0.87577800  |
| Cl | -0.46166000 | 5.56021800  | -0.91979300 |
| C  | -4.92373000 | -0.79861100 | -3.78454700 |
| C  | -4.17631700 | 0.46894800  | -3.53704600 |
| C  | -5.76882300 | -1.37563700 | -2.90452800 |
| H  | -4.77018000 | -1.28073800 | -4.75326600 |
| C  | -4.01792800 | 0.74238900  | -2.04655500 |
| H  | -4.72071500 | 1.30031500  | -4.01893200 |
| H  | -3.19481900 | 0.44063200  | -4.03184800 |
| C  | -6.04800200 | -0.71447900 | -1.61237800 |
| C  | -6.47792300 | -2.66333400 | -3.16414100 |
| C  | -3.33444800 | 2.05238100  | -1.69631900 |
| C  | -5.38282500 | 0.62127700  | -1.36445100 |
| H  | -3.38782300 | -0.07077000 | -1.64314500 |
| O  | -6.80698100 | -1.21616900 | -0.78957100 |

|   |             |             |             |
|---|-------------|-------------|-------------|
| H | -7.56318100 | -2.54458000 | -3.06395000 |
| H | -6.25566600 | -3.05184900 | -4.16339700 |
| H | -6.19258300 | -3.42383300 | -2.42618200 |
| C | -3.09349600 | 3.03152200  | -2.64369500 |
| H | -6.04918500 | 1.41105700  | -1.75112900 |
| H | -5.31460000 | 0.77878000  | -0.28028000 |
| H | -3.34296600 | 2.90983100  | -3.69390900 |
| H | -2.57424900 | 3.94754200  | -2.36821600 |
| C | -2.91477200 | 2.21607400  | -0.37523300 |
| H | -1.28964600 | 0.90151200  | -1.54171300 |
| H | -2.41470600 | 3.13140100  | -0.05940300 |
| H | -3.05029700 | 1.43424600  | 0.37429000  |
| C | 4.25176000  | 2.31913900  | 1.18478100  |
| H | 3.76960800  | 2.47430600  | 2.15856100  |
| H | 5.21247000  | 2.84812700  | 1.19997400  |
| H | 3.62498800  | 2.78538800  | 0.41765600  |
| C | 5.41641000  | 0.24099400  | 1.94671100  |
| H | 6.38960300  | 0.74621200  | 1.89844700  |
| H | 5.01320900  | 0.37314600  | 2.95614900  |
| H | 5.57653900  | -0.83000200 | 1.79049100  |
| C | 0.95450100  | -4.61265800 | -2.36877400 |
| H | 1.28349400  | -5.36798200 | -3.09289200 |
| H | 0.24494700  | -5.09653500 | -1.68609600 |
| H | 0.42898100  | -3.82008500 | -2.91126400 |
| C | 2.85356700  | -5.18233900 | -0.83662200 |
| H | 2.16682600  | -5.64927000 | -0.12319200 |
| H | 3.19819300  | -5.95439300 | -1.53644500 |
| H | 3.71956200  | -4.81590200 | -0.27653900 |
| C | -2.65037300 | -4.54488400 | 0.83719700  |
| H | -3.59309800 | -5.10235500 | 0.89590200  |
| H | -2.18543000 | -4.78109300 | -0.12806400 |
| H | -1.98781900 | -4.89691600 | 1.63445900  |
| C | -3.81582100 | -2.56981600 | -0.17662300 |
| H | -3.35298400 | -2.74928600 | -1.15398600 |
| H | -4.78165000 | -3.08941200 | -0.14728900 |
| H | -4.01511800 | -1.49666200 | -0.09312800 |
| C | -1.17000800 | 3.12041900  | 2.73410900  |
| H | -1.46155400 | 3.90921800  | 3.43921200  |
| H | -0.42837800 | 3.54466800  | 2.04791000  |
| H | -2.05174400 | 2.84384300  | 2.14909700  |
| C | 0.59253200  | 2.38227100  | 4.34811800  |
| H | 1.36371700  | 2.84798900  | 3.72111800  |
| H | 0.26913700  | 3.12913100  | 5.08332400  |
| H | 1.04373700  | 1.54002200  | 4.88204400  |

**E<sup>-3</sup>TS<sub>2A-s</sub>**

|    |             |             |             |
|----|-------------|-------------|-------------|
| Rh | 0.58415400  | -2.29942500 | 1.56278600  |
| Rh | 0.14912200  | -0.41340700 | 0.05625200  |
| O  | 2.47488900  | -1.54747900 | 1.86299400  |
| C  | 2.85545300  | -0.50554600 | 1.24695300  |
| O  | 2.13384100  | 0.19277100  | 0.46394600  |
| O  | 1.25979100  | -3.36717800 | -0.07663700 |
| C  | 1.15816900  | -2.84151600 | -1.22960500 |
| O  | 0.72305800  | -1.67559400 | -1.48846800 |
| O  | -1.77861500 | -1.23854100 | -0.19631000 |
| C  | -2.06122900 | -2.35254000 | 0.34205900  |
| O  | -1.31956800 | -2.99250300 | 1.15385000  |
| O  | -0.10215100 | -1.07899100 | 3.12821300  |
| C  | -0.40444300 | 0.12835500  | 2.88128600  |
| O  | -0.38837300 | 0.68494900  | 1.73780200  |
| C  | 4.28773300  | -0.02765000 | 1.47974200  |
| C  | 4.97281700  | 0.16865000  | 0.10169600  |
| H  | 4.44315400  | 0.96871400  | -0.43428900 |
| H  | 5.99069100  | 0.53655900  | 0.29893000  |
| C  | 5.01493800  | -1.07167200 | -0.74750400 |
| C  | 3.93875600  | -1.38117800 | -1.58361900 |
| C  | 6.09767400  | -1.95502600 | -0.69629500 |
| C  | 3.91190900  | -2.55400200 | -2.34357600 |
| H  | 3.10553200  | -0.68319200 | -1.65862100 |
| C  | 6.09536400  | -3.11842400 | -1.46044000 |
| H  | 6.95224700  | -1.72171900 | -0.05960400 |
| C  | 5.00692400  | -3.42038700 | -2.27391000 |
| H  | 6.94943700  | -3.79311200 | -1.42396300 |
| H  | 5.00891800  | -4.33294700 | -2.87154600 |
| C  | 1.59695500  | -3.66307500 | -2.44157600 |
| C  | 2.70567300  | -2.86805200 | -3.18320300 |
| H  | 2.99375200  | -3.46408200 | -4.06190600 |
| H  | 2.26097200  | -1.93396500 | -3.55102800 |
| C  | -0.86838600 | 0.98814500  | 4.05797000  |
| C  | -3.42745100 | -2.96724600 | 0.03705900  |
| C  | -2.24408300 | 0.43553500  | 4.52333600  |
| H  | -2.06342000 | -0.51311600 | 5.04552500  |
| H  | -2.63659500 | 1.14155300  | 5.26985600  |

|    |             |             |             |
|----|-------------|-------------|-------------|
| C  | -4.31857300 | -2.75515100 | 1.29487200  |
| H  | -5.34438100 | -3.03538700 | 1.01412600  |
| H  | -3.98946500 | -3.46741600 | 2.06318600  |
| C  | -3.24856500 | 0.20483300  | 3.42851300  |
| C  | -3.36417100 | -1.07219100 | 2.87541300  |
| C  | -4.07737400 | 1.21866000  | 2.93379500  |
| C  | -4.27772400 | -1.36428400 | 1.86012000  |
| H  | -2.72288000 | -1.86994700 | 3.25444000  |
| C  | -4.99642300 | 0.94820500  | 1.92179000  |
| H  | -4.02476400 | 2.21741100  | 3.36922000  |
| C  | -5.09865100 | -0.33524500 | 1.38844900  |
| H  | -5.66438700 | 1.72717600  | 1.55594100  |
| H  | -5.84553200 | -0.54010200 | 0.62014800  |
| O  | -0.11089600 | 2.26380200  | -3.68886600 |
| S  | 0.52626700  | 1.87895600  | -2.44251800 |
| O  | 1.59015600  | 0.89168500  | -2.45850800 |
| N  | -0.55565400 | 1.41940900  | -1.27304100 |
| C  | 2.47556000  | 3.23558300  | -1.30388700 |
| H  | 2.63133800  | 2.27317300  | -0.79563200 |
| O  | 1.18760300  | 3.32312900  | -1.88655000 |
| H  | 3.24507900  | 3.36874400  | -2.07562300 |
| C  | 2.62103400  | 4.35402000  | -0.28190300 |
| Cl | 2.17755800  | 5.92544000  | -0.99386100 |
| Cl | 4.33524000  | 4.38747800  | 0.22755600  |
| Cl | 1.57734000  | 4.02345500  | 1.13559400  |
| C  | -4.65078800 | 0.25469400  | -3.28434100 |
| C  | -3.36104800 | 0.95024600  | -3.02192400 |
| C  | -5.79682600 | 0.44452800  | -2.59856300 |
| H  | -4.63847700 | -0.49771100 | -4.07759400 |
| C  | -3.33506200 | 1.66313800  | -1.66550000 |
| H  | -3.14819700 | 1.65644400  | -3.84205600 |
| H  | -2.53188100 | 0.22823300  | -3.05212500 |
| C  | -5.85835900 | 1.47235900  | -1.54471000 |
| C  | -7.03527500 | -0.35681600 | -2.82641200 |
| C  | -2.21400500 | 2.63442400  | -1.52301200 |
| C  | -4.66550900 | 2.39959400  | -1.42862200 |
| H  | -3.22580700 | 0.89112800  | -0.88639300 |
| O  | -6.84237800 | 1.60693800  | -0.82720400 |
| H  | -7.88869900 | 0.28442200  | -3.07700200 |
| H  | -6.89745500 | -1.08987500 | -3.62809600 |
| H  | -7.32310900 | -0.89267900 | -1.91276000 |
| H  | -4.78943900 | 3.19009000  | -2.18684200 |
| H  | -4.69307600 | 2.88746100  | -0.44671600 |
| C  | -1.23804900 | 2.45378100  | -0.45715700 |
| H  | -0.62188300 | 3.32453600  | -0.21175700 |
| H  | -1.60599300 | 1.96827600  | 0.45096700  |
| C  | -2.13545600 | 3.82349500  | -2.40293400 |
| H  | -2.37279000 | 3.61530500  | -3.45091200 |
| H  | -2.87853700 | 4.55269600  | -2.03665500 |
| H  | -1.15993900 | 4.31505800  | -2.35876200 |
| C  | 0.38962000  | -3.79998500 | -3.37461400 |
| H  | 0.67184700  | -4.36294500 | -4.27304700 |
| H  | -0.42996100 | -4.34325300 | -2.88669900 |
| H  | 0.01551000  | -2.81787400 | -3.68266500 |
| C  | 2.09515200  | -5.03818900 | -2.01594400 |
| H  | 1.30544500  | -5.60898600 | -1.51589600 |
| H  | 2.41852300  | -5.60429500 | -2.89923700 |
| H  | 2.93948200  | -4.96569700 | -1.32351900 |
| C  | 4.20664400  | 1.32019000  | 2.20064400  |
| H  | 3.76671100  | 1.20787600  | 3.19974700  |
| H  | 5.21035100  | 1.74654700  | 2.32250800  |
| H  | 3.59807400  | 2.03673400  | 1.63967300  |
| C  | 5.06375800  | -1.02575300 | 2.33149100  |
| H  | 6.08602900  | -0.65707500 | 2.48847700  |
| H  | 4.59396500  | -1.15909900 | 3.31099500  |
| H  | 5.12304200  | -2.00936100 | 1.85496100  |
| C  | -4.04997700 | -2.28768800 | -1.17321600 |
| H  | -3.40553500 | -2.37753300 | -2.05687400 |
| H  | -5.02032300 | -2.74590100 | -1.40747400 |
| H  | -4.21084500 | -1.22188400 | -0.99043500 |
| C  | -3.27671900 | -4.46729600 | -0.21198400 |
| H  | -4.26473800 | -4.91964300 | -0.36387500 |
| H  | -2.67884800 | -4.66584200 | -1.11010200 |
| H  | -2.79287600 | -4.96548700 | 0.63322400  |
| C  | -0.99014000 | 2.45215200  | 3.64904200  |
| H  | -1.30920200 | 3.05085200  | 4.51181400  |
| H  | -0.02840800 | 2.84561400  | 3.30139400  |
| H  | -1.71824500 | 2.59566700  | 2.84365400  |
| C  | 0.13097600  | 0.84902400  | 5.20684500  |
| H  | 1.10760100  | 1.26880700  | 4.93550600  |
| H  | -0.23119600 | 1.39344200  | 6.08786600  |
| H  | 0.27493600  | -0.20054400 | 5.48068500  |

E-<sup>3</sup>TS<sub>2A-R</sub>

|    |             |             |             |
|----|-------------|-------------|-------------|
| Rh | -0.34769000 | 0.53267300  | -0.13804300 |
| Rh | -1.88121500 | 2.37877600  | 0.35384500  |
| O  | 0.44832800  | 0.78777700  | 1.76142700  |
| C  | -0.03414300 | 1.68146700  | 2.53023800  |
| O  | -0.97349600 | 2.48436700  | 2.24680500  |
| O  | 0.93944900  | 2.05291000  | -0.95772300 |
| C  | 0.57348500  | 3.26357800  | -0.95467900 |
| O  | -0.51307600 | 3.70333700  | -0.45615800 |
| O  | -2.70189700 | 2.13056200  | -1.52863200 |
| C  | -2.19993500 | 1.24192400  | -2.28688300 |
| O  | -1.24290800 | 0.45634500  | -1.99808600 |
| O  | -1.85208900 | -0.71989400 | 0.74926700  |
| C  | -2.94921700 | -0.20973900 | 1.14136400  |
| O  | -3.23024600 | 1.02766300  | 1.11303500  |
| C  | 0.58803700  | 1.80117000  | 3.92242300  |
| C  | 1.17619100  | 3.23072400  | 4.06237000  |
| H  | 0.33633300  | 3.93742400  | 4.07757500  |
| H  | 1.66144500  | 3.28547700  | 5.04790200  |
| C  | 2.13949800  | 3.62286500  | 2.97691400  |
| C  | 1.66373700  | 4.26543600  | 1.83092600  |
| C  | 3.50897600  | 3.35088000  | 3.06553400  |
| C  | 2.50764700  | 4.62756400  | 0.77700700  |
| H  | 0.60085700  | 4.49825900  | 1.75965500  |
| C  | 4.36766600  | 3.71182900  | 2.03052900  |
| H  | 3.90555200  | 2.87343200  | 3.96262300  |
| C  | 3.87221400  | 4.34217400  | 0.89184800  |
| H  | 5.43543200  | 3.51404200  | 2.11818700  |
| H  | 4.55293400  | 4.63646400  | 0.09196600  |
| C  | 1.50126600  | 4.31291400  | -1.57092500 |
| C  | 1.92770800  | 5.28959100  | -0.44121300 |
| H  | 2.65005500  | 5.99363300  | -0.87981800 |
| H  | 1.04465400  | 5.87350800  | -0.15098700 |
| C  | -4.00172200 | -1.15843800 | 1.71421100  |
| C  | -2.77572100 | 1.07753900  | -3.69356600 |
| C  | -4.27285300 | -2.27514600 | 0.67335600  |
| H  | -3.34744500 | -2.85097000 | 0.54248700  |
| H  | -5.00923200 | -2.96080000 | 1.11898300  |
| C  | -3.22812900 | -0.39822900 | -3.86432400 |
| C  | -4.75783300 | -1.77117600 | -0.65708500 |
| C  | -3.83842300 | -1.40166100 | -1.64314100 |
| C  | -6.12207700 | -1.61810100 | -0.92329200 |
| C  | -4.25011100 | -0.85527600 | -2.86284700 |
| H  | -2.77211900 | -1.54774900 | -1.46461500 |
| C  | -6.55007200 | -1.09946900 | -2.14164300 |
| H  | -6.85186800 | -1.91473400 | -0.16865800 |
| C  | -5.62031200 | -0.71243600 | -3.10178400 |
| H  | -7.61522600 | -0.99635700 | -2.34369000 |
| H  | -5.95743300 | -0.30229300 | -4.05459400 |
| O  | 2.09413500  | -2.89163500 | -2.17963400 |
| S  | 0.94684200  | -2.43548000 | -1.41054900 |
| O  | -0.31943100 | -2.16388700 | -2.06127200 |
| N  | 1.27439400  | -1.16398800 | -0.41235100 |
| O  | 0.71474000  | -3.74056700 | -0.37948200 |
| C  | -0.59103400 | -3.91167000 | 0.13822500  |
| H  | -1.12812600 | -2.95754900 | 0.24517700  |
| H  | -1.16744700 | -4.58187800 | -0.51300300 |
| C  | -0.47472900 | -4.55308700 | 1.51631000  |
| Cl | 0.57806300  | -5.98829000 | 1.46583300  |
| Cl | -2.11600200 | -5.04095300 | 2.02878600  |
| Cl | 0.19384900  | -3.37011800 | 2.68558000  |
| C  | 2.21691500  | -1.46979500 | 0.70124000  |
| C  | 3.32812700  | -0.80370000 | 0.01410500  |
| H  | 2.33545100  | -2.53843700 | 0.90026800  |
| H  | 1.86825700  | -0.95596700 | 1.60117400  |
| C  | 3.42100100  | 0.66312500  | 0.14248200  |
| C  | 4.31264200  | -1.54577400 | -0.82600400 |
| H  | 4.36483500  | 0.92069300  | 0.65051400  |
| H  | 2.59491100  | 1.08498500  | 0.72087000  |
| H  | 3.45450600  | 1.16681900  | -0.83242700 |
| C  | 5.63805300  | -0.79786600 | -0.99996300 |
| C  | 4.58335800  | -2.97691600 | -0.34973500 |
| H  | 3.85732900  | -1.64017900 | -1.82879800 |
| H  | 6.13352900  | -0.68286200 | -0.02095200 |
| H  | 5.50436300  | 0.21180000  | -1.40062700 |
| C  | 6.60374100  | -1.52815700 | -1.91659600 |
| C  | 5.63927200  | -3.64205500 | -1.16531700 |
| H  | 4.88159600  | -2.97163600 | 0.71416000  |
| H  | 3.66724300  | -3.57739400 | -0.40080100 |
| C  | 6.54776100  | -3.00228700 | -1.92799300 |
| O  | 7.42909100  | -0.91082100 | -2.57471400 |
| H  | 5.65391500  | -4.73383200 | -1.13788100 |
| C  | 7.55720100  | -3.70042000 | -2.77618100 |

|   |             |             |             |
|---|-------------|-------------|-------------|
| H | 8.57595400  | -3.40317400 | -2.50064500 |
| H | 7.47032400  | -4.78837400 | -2.69381800 |
| H | 7.44001400  | -3.42086900 | -3.82997500 |
| C | 2.72170800  | 3.66152000  | -2.20799000 |
| H | 2.43097500  | 2.91689900  | -2.95683900 |
| H | 3.33607000  | 4.42519900  | -2.70208200 |
| H | 3.34430400  | 3.15887800  | -1.46027600 |
| C | 0.71801300  | 5.09856600  | -2.62528700 |
| H | 1.34313200  | 5.90350800  | -3.03171900 |
| H | 0.42148300  | 4.45447000  | -3.46211500 |
| H | -0.18658800 | 5.54320300  | -2.19908300 |
| C | 1.67137200  | 0.74756300  | 4.12896200  |
| H | 2.10273700  | 0.85028700  | 5.13308300  |
| H | 1.26113500  | -0.26489500 | 4.03800100  |
| H | 2.48152400  | 0.84738600  | 3.39704600  |
| C | -0.52171100 | 1.61992300  | 4.96097200  |
| H | -0.95276500 | 0.61222600  | 4.90661700  |
| H | -0.11697000 | 1.75582800  | 5.97166200  |
| H | -1.32722800 | 2.34504500  | 4.80849700  |
| C | -3.41887000 | -1.77936500 | 2.98685900  |
| H | -3.25707600 | -1.01427600 | 3.75693500  |
| H | -4.11393700 | -2.52330000 | 3.39633600  |
| H | -2.46301700 | -2.27674000 | 2.79176300  |
| C | -5.28706700 | -0.40918300 | 2.04786800  |
| H | -6.02570200 | -1.11083500 | 2.45748400  |
| H | -5.10742100 | 0.37228700  | 2.79289900  |
| H | -5.72049200 | 0.06838600  | 1.16354600  |
| C | -1.64739100 | 1.35013000  | -4.69348200 |
| H | -2.01265500 | 1.20269300  | -5.71762000 |
| H | -1.28822300 | 2.38407700  | -4.61547000 |
| H | -0.80145600 | 0.67546900  | -4.52545500 |
| C | -3.93006200 | 2.04422900  | -3.92529700 |
| H | -3.59712000 | 3.08431100  | -3.84182300 |
| H | -4.33895900 | 1.89695600  | -4.93362700 |
| H | -4.73694900 | 1.89802800  | -3.20062600 |
| H | -2.33515900 | -1.03272300 | -3.80083600 |
| H | -3.62609200 | -0.49216200 | -4.88553200 |

E<sup>-3</sup>TS2:

|    |             |             |             |
|----|-------------|-------------|-------------|
| Rh | 1.40803300  | -1.64127400 | 1.87147000  |
| Rh | 0.53262400  | -0.42711100 | -0.03786800 |
| O  | 3.16275800  | -0.56639200 | 1.67732400  |
| C  | 3.24321900  | 0.32497200  | 0.77549800  |
| O  | 2.32719200  | 0.64184000  | -0.05152600 |
| O  | 2.12894300  | -3.03825800 | 0.53405100  |
| C  | 1.94241700  | -2.89176800 | -0.71335100 |
| O  | 1.29686100  | -1.92876100 | -1.24032200 |
| O  | -1.20554800 | -1.55354300 | 0.11339500  |
| C  | -1.29106700 | -2.43389000 | 1.03031400  |
| O  | -0.40977800 | -2.68189700 | 1.91033300  |
| O  | 0.64440800  | -0.15320800 | 3.10480600  |
| C  | 0.02501400  | 0.83350400  | 2.59060300  |
| O  | -0.19736300 | 0.98716200  | 1.35159600  |
| C  | 4.54545100  | 1.12021000  | 0.66992100  |
| C  | 5.04876500  | 1.05241600  | -0.79653400 |
| H  | 4.29729700  | 1.53309800  | -1.43760600 |
| H  | 5.96131500  | 1.66403100  | -0.84903300 |
| C  | 5.31992100  | -0.34115500 | -1.28694000 |
| C  | 4.28804900  | -1.08518600 | -1.86663500 |
| C  | 6.57502100  | -0.93980700 | -1.13715200 |
| C  | 4.47279300  | -2.41566200 | -2.25284400 |
| H  | 3.32035400  | -0.60951900 | -2.02811000 |
| C  | 6.78547200  | -2.25173300 | -1.54991600 |
| H  | 7.39404700  | -0.36705200 | -0.70009000 |
| C  | 5.73869700  | -2.98897000 | -2.09480600 |
| H  | 7.77046000  | -2.70345400 | -1.44325100 |
| H  | 5.90299300  | -4.02103700 | -2.40770200 |
| C  | 2.49473500  | -3.94138200 | -1.67255100 |
| C  | 3.31471800  | -3.21758700 | -2.77491800 |
| H  | 3.66766200  | -3.99445400 | -3.46869900 |
| H  | 2.63102500  | -2.56781300 | -3.33615500 |
| C  | -0.50235500 | 1.90233900  | 3.54559200  |
| C  | -2.57688300 | -3.25916600 | 1.08594900  |
| C  | -1.52383900 | 1.22689500  | 4.50097200  |
| H  | -0.97511700 | 0.52817100  | 5.14585000  |
| H  | -1.92484500 | 2.01857900  | 5.15061000  |
| C  | -3.23905500 | -3.01572100 | 2.46833400  |
| H  | -4.18764200 | -3.57119200 | 2.46938300  |
| H  | -2.59735500 | -3.46826700 | 3.23530300  |
| C  | -2.63718000 | 0.50014700  | 3.79897100  |
| C  | -2.49661100 | -0.85767600 | 3.50087900  |
| C  | -3.80758500 | 1.14995400  | 3.39262200  |
| C  | -3.47324800 | -1.56834600 | 2.79767800  |



|                                       |             |             |             |
|---------------------------------------|-------------|-------------|-------------|
| H                                     | -1.59717000 | -1.38223900 | 3.82616400  |
| C                                     | -4.79458800 | 0.45565100  | 2.69806600  |
| H                                     | -3.94940100 | 2.20403100  | 3.63429300  |
| C                                     | -4.63116700 | -0.89426200 | 2.39419000  |
| H                                     | -5.70730600 | 0.96779500  | 2.39479700  |
| H                                     | -5.41069900 | -1.42197100 | 1.84142200  |
| O                                     | -0.96203300 | 1.50212100  | -3.88492800 |
| S                                     | -0.04760700 | 1.48380100  | -2.75796700 |
| O                                     | 1.36497200  | 1.17841900  | -2.92841500 |
| N                                     | -0.68413400 | 0.65662700  | -1.47566900 |
| C                                     | 0.65767300  | 3.26450900  | -1.01411200 |
| H                                     | 0.27462900  | 2.70519800  | -0.14500200 |
| O                                     | -0.13718700 | 3.02970500  | -2.16318000 |
| H                                     | 1.70381900  | 2.97844200  | -1.19064000 |
| C                                     | 0.59380400  | 4.75234100  | -0.70979700 |
| Cl                                    | 1.26901300  | 5.70523100  | -2.04690800 |
| Cl                                    | 1.55477500  | 5.03468400  | 0.77790300  |
| Cl                                    | -1.09991700 | 5.25356900  | -0.41061500 |
| C                                     | -5.55705600 | -0.90204500 | -3.69560200 |
| C                                     | -4.78908100 | 0.36207800  | -3.49481700 |
| C                                     | -6.14381400 | -1.60449400 | -2.70400900 |
| H                                     | -5.64282600 | -1.27263800 | -4.72002500 |
| C                                     | -4.25898200 | 0.46609900  | -2.07144400 |
| H                                     | -5.44932400 | 1.21909500  | -3.71633400 |
| H                                     | -3.96616300 | 0.43575100  | -4.21950600 |
| C                                     | -6.11337300 | -1.08805200 | -1.31949500 |
| C                                     | -6.87773800 | -2.88584200 | -2.92109700 |
| C                                     | -3.49544900 | 1.73419900  | -1.75573300 |
| C                                     | -5.40940900 | 0.23261700  | -1.08976900 |
| H                                     | -3.55363000 | -0.37502000 | -1.93379700 |
| O                                     | -6.66353500 | -1.69046900 | -0.40387900 |
| H                                     | -7.90863100 | -2.81615600 | -2.55454800 |
| H                                     | -6.89622500 | -3.16671800 | -3.97899400 |
| H                                     | -6.41538600 | -3.70306600 | -2.35355100 |
| C                                     | -3.57542000 | 2.86947600  | -2.51537500 |
| H                                     | -6.15150200 | 1.04059700  | -1.20712500 |
| H                                     | -5.07509900 | 0.27219500  | -0.04482400 |
| H                                     | -4.18626600 | 2.93635900  | -3.41216000 |
| H                                     | -2.97694300 | 3.74261600  | -2.26437300 |
| C                                     | -2.62795200 | 1.68588100  | -0.64983800 |
| H                                     | -1.27405700 | -0.07644500 | -1.88388300 |
| H                                     | -2.07937500 | 2.56947600  | -0.33108700 |
| H                                     | -2.62869700 | 0.84465600  | 0.04378300  |
| C                                     | 4.22315700  | 2.57845700  | 1.00616600  |
| H                                     | 3.81710400  | 2.67835800  | 2.02160700  |
| H                                     | 5.13446200  | 3.18640900  | 0.94951600  |
| H                                     | 3.49160200  | 2.99550200  | 0.30660200  |
| C                                     | 5.59103300  | 0.58036000  | 1.63833600  |
| H                                     | 6.51556600  | 1.16454700  | 1.54319100  |
| H                                     | 5.24617400  | 0.65277700  | 2.67476900  |
| H                                     | 5.82712900  | -0.46947100 | 1.43840100  |
| C                                     | 1.30043400  | -4.64001800 | -2.33203000 |
| H                                     | 1.65911600  | -5.38433000 | -3.05360200 |
| H                                     | 0.68889500  | -5.16667700 | -1.58884900 |
| H                                     | 0.66298500  | -3.92528900 | -2.86361200 |
| C                                     | 3.34844700  | -4.95935300 | -0.92608500 |
| H                                     | 2.76045400  | -5.49649700 | -0.17475600 |
| H                                     | 3.74952900  | -5.69479900 | -1.63546400 |
| H                                     | 4.19058400  | -4.48483000 | -0.41238600 |
| C                                     | -2.20622000 | -4.73942000 | 0.96875700  |
| H                                     | -3.10698600 | -5.35738300 | 1.06847300  |
| H                                     | -1.75898600 | -4.96022300 | -0.00847800 |
| H                                     | -1.49515600 | -5.03394500 | 1.74724200  |
| C                                     | -3.52908900 | -2.86272100 | -0.03540900 |
| H                                     | -3.08880500 | -3.04362600 | -1.02331300 |
| H                                     | -4.45940500 | -3.43917000 | 0.03972100  |
| H                                     | -3.79226700 | -1.80130600 | 0.02607500  |
| C                                     | -1.16105300 | 3.03872600  | 2.77159500  |
| H                                     | -1.52786200 | 3.80166400  | 3.47043100  |
| H                                     | -0.45032500 | 3.52253200  | 2.09208900  |
| H                                     | -2.00724100 | 2.68503600  | 2.17337400  |
| C                                     | 0.67354600  | 2.43889500  | 4.36542400  |
| H                                     | 1.40708100  | 2.94022000  | 3.72046700  |
| H                                     | 0.31532900  | 3.17637100  | 5.09424100  |
| H                                     | 1.18390800  | 1.63542100  | 4.90603200  |
| <b>E-<sup>1</sup>PC<sub>A,S</sub></b> |             |             |             |
| Rh                                    | -0.52633200 | -2.50964900 | 1.02796300  |
| Rh                                    | -0.22756500 | -0.45111400 | -0.16304500 |
| O                                     | 1.27967000  | -2.15907200 | 1.96823600  |
| C                                     | 1.91389900  | -1.09071300 | 1.72245200  |
| O                                     | 1.57273600  | -0.19090700 | 0.88294600  |
| O                                     | 0.40748400  | -3.49708800 | -0.50708700 |

|    |             |             |             |
|----|-------------|-------------|-------------|
| C  | 0.76913100  | -2.83224900 | -1.52752600 |
| O  | 0.63971900  | -1.57723500 | -1.68736700 |
| O  | -2.05969400 | -0.80809600 | -1.08796100 |
| C  | -2.68345500 | -1.88240800 | -0.81145000 |
| O  | -2.31629800 | -2.77053400 | 0.02116400  |
| O  | -1.45458000 | -1.46413600 | 2.57186600  |
| C  | -1.58499700 | -0.20938300 | 2.44295100  |
| O  | -1.20001000 | 0.47626400  | 1.44211500  |
| C  | 3.21851900  | -0.85764700 | 2.48617500  |
| C  | 4.38710900  | -0.89798200 | 1.46504100  |
| H  | 4.31813600  | 0.00130500  | 0.83836300  |
| H  | 5.32102100  | -0.80729500 | 2.03983100  |
| C  | 4.42131800  | -2.11132500 | 0.57878900  |
| C  | 3.71741100  | -2.09464300 | -0.62753600 |
| C  | 5.13201600  | -3.26482100 | 0.92163300  |
| C  | 3.70354900  | -3.19222100 | -1.49074200 |
| H  | 3.16888800  | -1.19768600 | -0.91296100 |
| C  | 5.13100300  | -4.36866700 | 0.07275800  |
| H  | 5.70177200  | -3.29050000 | 1.85155000  |
| C  | 4.42309800  | -4.33427000 | -1.12568600 |
| H  | 5.69726300  | -5.25887800 | 0.34210800  |
| H  | 4.43901900  | -5.19700100 | -1.79294100 |
| C  | 1.44281800  | -3.59846600 | -2.66554600 |
| C  | 2.91404500  | -3.11060400 | -2.76719200 |
| H  | 3.39331800  | -3.70961800 | -3.55569900 |
| H  | 2.89798600  | -2.06941500 | -3.11600400 |
| C  | -2.26120400 | 0.53903800  | 3.59126800  |
| C  | -4.00236900 | -2.15515400 | -1.53560300 |
| C  | -3.68167700 | -0.05572900 | 3.78063400  |
| H  | -3.57003700 | -1.08793000 | 4.13713200  |
| H  | -4.16416300 | 0.51361800  | 4.58852300  |
| C  | -5.11925200 | -2.29858400 | -0.46634200 |
| H  | -6.06392300 | -2.45589000 | -1.00747500 |
| H  | -4.91942400 | -3.21303900 | 0.10697400  |
| C  | -4.53183100 | -0.03641800 | 2.54153100  |
| C  | -4.50200700 | -1.12220200 | 1.66181700  |
| C  | -5.33590400 | 1.06038800  | 2.21883500  |
| C  | -5.23729200 | -1.13127400 | 0.47352700  |
| H  | -3.88785200 | -1.98826200 | 1.90895000  |
| C  | -6.09535600 | 1.05968400  | 1.05284500  |
| H  | -5.37804100 | 1.91823100  | 2.89102200  |
| C  | -6.04263700 | -0.02518600 | 0.18232000  |
| H  | -6.71780100 | 1.92214100  | 0.82267500  |
| H  | -6.64051900 | -0.02228000 | -0.73087600 |
| O  | 1.26587600  | 2.43653600  | -3.33056200 |
| S  | 1.70442400  | 1.85919100  | -2.08299600 |
| O  | 2.33484300  | 0.56358500  | -2.00328100 |
| N  | 0.37729100  | 1.86853100  | -1.00601500 |
| C  | 3.72034600  | 2.36874200  | -0.53844500 |
| H  | 3.21609200  | 1.80240700  | 0.25941900  |
| O  | 2.77171100  | 2.95184900  | -1.43175300 |
| H  | 4.39124900  | 1.69230500  | -1.08108200 |
| C  | 4.54308500  | 3.49031800  | 0.07335100  |
| Cl | 5.35395700  | 4.43316700  | -1.19321000 |
| Cl | 5.75539600  | 2.71233000  | 1.13184100  |
| Cl | 3.50575900  | 4.56961500  | 1.05475200  |
| C  | -3.77814100 | 2.31860700  | -2.66115700 |
| C  | -2.31446000 | 2.31847600  | -2.39897600 |
| C  | -4.71907000 | 2.87735900  | -1.87367900 |
| H  | -4.10017300 | 1.80815400  | -3.57260700 |
| C  | -1.95040800 | 2.75486900  | -0.97740600 |
| H  | -1.82531000 | 2.96745200  | -3.14591300 |
| H  | -1.90676000 | 1.31434800  | -2.58702000 |
| C  | -4.31638500 | 3.62609000  | -0.66668400 |
| C  | -6.17900400 | 2.80934900  | -2.17859100 |
| C  | -0.47204000 | 3.10801400  | -0.90161100 |
| C  | -2.83473800 | 3.91231400  | -0.51804500 |
| H  | -2.13177200 | 1.89802200  | -0.30775300 |
| O  | -5.13754900 | 4.06458100  | 0.12803500  |
| H  | -6.59939200 | 3.80940800  | -2.34342900 |
| H  | -6.37392400 | 2.19802700  | -3.06678800 |
| H  | -6.73723200 | 2.38568000  | -1.33622000 |
| H  | -2.63760500 | 4.80149800  | -1.13886800 |
| H  | -2.63103300 | 4.20185900  | 0.52024500  |
| C  | 0.37445400  | 2.68309200  | 0.23038800  |
| H  | 1.26479300  | 3.28190400  | 0.41696800  |
| H  | -0.03876900 | 2.15478900  | 1.08601900  |
| C  | -0.05312800 | 4.38109700  | -1.60030200 |
| H  | -0.37130200 | 4.41436100  | -2.64615600 |
| H  | -0.51083400 | 5.22660000  | -1.07432300 |
| H  | 1.02806700  | 4.53594300  | -1.57497200 |
| C  | 0.73234500  | -3.25598500 | -3.97677100 |
| H  | 1.23053100  | -3.75984100 | -4.81452900 |

|   |             |             |              |
|---|-------------|-------------|--------------|
| H | -0.31268000 | -3.59009100 | -3.96242400  |
| H | 0.74504000  | -2.17733600 | -4.16238800  |
| C | 1.38667500  | -5.10043200 | -2.411173700 |
| H | 0.35144200  | -5.44954900 | -2.32982900  |
| H | 1.86249800  | -5.63332100 | -3.24543700  |
| H | 1.90020400  | -5.37729600 | -1.48574700  |
| C | 3.17399300  | 0.52894600  | 3.13292500   |
| H | 2.37585900  | 0.59334600  | 3.88317800   |
| H | 4.12497100  | 0.74277800  | 3.63690900   |
| H | 3.00021800  | 1.31774800  | 2.39044800   |
| C | 3.41267600  | -1.92580000 | 3.55663500   |
| H | 4.34140000  | -1.73129900 | 4.10879000   |
| H | 2.58249700  | -1.92588200 | 4.27110000   |
| H | 3.47151600  | -2.92791000 | 3.12106200   |
| C | -4.33319000 | -1.03344800 | -2.50968000  |
| H | -3.54634900 | -0.91455600 | -3.26375700  |
| H | -5.27532700 | -1.25505800 | -3.02949500  |
| H | -4.44437500 | -0.07615900 | -1.99055400  |
| C | -3.86702600 | -3.48353100 | -2.28493900  |
| H | -4.81308800 | -3.73067200 | -2.78306900  |
| H | -3.09027600 | -3.42528000 | -3.05775700  |
| H | -3.60986800 | -4.29978600 | -1.60251100  |
| C | -2.33729100 | 2.03455800  | 3.30308500   |
| H | -2.81751000 | 2.55147000  | 4.14380400   |
| H | -1.33799600 | 2.46594300  | 3.17040900   |
| H | -2.91965100 | 2.24725900  | 2.39947400   |
| C | -1.44949100 | 0.28998500  | 4.86580900   |
| H | -0.43455600 | 0.69867800  | 4.77849200   |
| H | -1.93244800 | 0.78087500  | 5.71991800   |
| H | -1.36916900 | -0.78035300 | 5.08089800   |

E-<sup>1</sup>PC<sub>A-R</sub>

|    |             |             |             |
|----|-------------|-------------|-------------|
| Rh | -0.68737000 | 0.46538100  | -0.16496700 |
| Rh | -2.92788000 | 1.01500100  | 0.49449400  |
| O  | -0.08644800 | 1.25107400  | 1.67948700  |
| C  | -0.93962500 | 1.78127200  | 2.46051400  |
| O  | -2.18237500 | 1.88778000  | 2.23608300  |
| O  | -0.60822400 | 2.29205900  | -1.12809000 |
| C  | -1.64125700 | 3.03155100  | -1.15223700 |
| O  | -2.74715900 | 2.79693800  | -0.57010300 |
| O  | -3.63559700 | 0.12920500  | -1.21245500 |
| C  | -2.78644600 | -0.28189900 | -2.06473800 |
| O  | -1.52250200 | -0.25245000 | -1.93648900 |
| O  | -0.86981300 | -1.35039300 | 0.84675800  |
| C  | -1.96673200 | -1.56823800 | 1.46387900  |
| O  | -2.97181600 | -0.79848700 | 1.49634000  |
| C  | -0.41653400 | 2.36180900  | 3.77391900  |
| C  | -0.69001700 | 3.89029400  | 3.75391100  |
| H  | -1.77373300 | 4.03791500  | 3.84671500  |
| H  | -0.22905700 | 4.31356100  | 4.65855600  |
| C  | -0.19525400 | 4.59961600  | 2.52459800  |
| C  | -1.05084500 | 4.75405900  | 1.43036600  |
| C  | 1.10684800  | 5.09984900  | 2.42605200  |
| C  | -0.64335000 | 5.38624800  | 0.25282600  |
| H  | -2.07081700 | 4.37372100  | 1.50122800  |
| C  | 1.53186600  | 5.73333400  | 1.26109400  |
| H  | 1.78406500  | 5.00948700  | 3.27645100  |
| C  | 0.66491900  | 5.87533200  | 0.18094600  |
| H  | 2.54354600  | 6.13214200  | 1.19885300  |
| H  | 0.99811000  | 6.39029200  | -0.72080200 |
| C  | -1.53448200 | 4.34519600  | -1.92697900 |
| C  | -1.60640200 | 5.50383200  | -0.89474000 |
| H  | -1.43693600 | 6.43930400  | -1.44804200 |
| H  | -2.63197500 | 5.54340400  | -0.50472700 |
| C  | -2.05423800 | -2.88768900 | 2.22884200  |
| C  | -3.31923900 | -0.88430900 | -3.36466400 |
| C  | -1.89548000 | -4.04519900 | 1.20829500  |
| H  | -0.86165500 | -4.02866000 | 0.83990200  |
| H  | -2.01414100 | -4.98737600 | 1.76426900  |
| C  | -2.90338500 | -2.38053600 | -3.40697100 |
| C  | -2.83791700 | -3.99604800 | 0.03852900  |
| C  | -2.47898500 | -3.28589500 | -1.11078700 |
| C  | -4.08196000 | -4.63237400 | 0.06958200  |
| C  | -3.33106300 | -3.18838600 | -2.21397300 |
| H  | -1.50485000 | -2.79725800 | -1.15590700 |
| C  | -4.93961400 | -4.55428700 | -1.02415900 |
| H  | -4.37197900 | -5.20470400 | 0.95175900  |
| C  | -4.56927800 | -3.83558400 | -2.15753200 |
| H  | -5.90138800 | -5.06445200 | -0.99611500 |
| H  | -5.24065500 | -3.78701000 | -3.01577800 |
| O  | 2.85886600  | -1.15148300 | -2.62954200 |
| S  | 1.91461000  | -1.45073300 | -1.57862400 |
| O  | 0.58804800  | -1.94421300 | -1.85913300 |

## ARTICLE

## Journal Name

|    |             |             |             |
|----|-------------|-------------|-------------|
| N  | 1.73532500  | -0.09614100 | -0.53057500 |
| O  | 2.65608300  | -2.59772600 | -0.64031900 |
| C  | 1.76843400  | -3.46975000 | 0.06005400  |
| H  | 1.02546000  | -2.90248800 | 0.64189500  |
| H  | 1.24399400  | -4.12377300 | -0.64700400 |
| C  | 2.61341700  | -4.32331100 | 0.99334400  |
| Cl | 3.89534700  | -5.16299100 | 0.09198200  |
| Cl | 1.51638200  | -5.51351500 | 1.74582400  |
| Cl | 3.35497300  | -3.30528300 | 2.26805800  |
| C  | 2.42319300  | -0.08335800 | 0.78396700  |
| C  | 2.87492400  | 0.88674500  | -0.23161000 |
| H  | 3.05581300  | -0.94226700 | 0.99266500  |
| H  | 1.77020800  | 0.23015300  | 1.59709300  |
| C  | 2.34631900  | 2.29547600  | -0.15369900 |
| C  | 4.25491700  | 0.74838900  | -0.90041200 |
| H  | 2.99727300  | 2.89720000  | 0.49020900  |
| H  | 1.34150700  | 2.33491200  | 0.26793600  |
| H  | 2.31940400  | 2.76390700  | -1.14438400 |
| C  | 5.13326300  | 1.97976000  | -0.64683900 |
| C  | 5.06646200  | -0.48219400 | -0.49048100 |
| H  | 4.08890600  | 0.69452500  | -1.98474700 |
| H  | 5.33953700  | 2.07890400  | 0.43290100  |
| H  | 4.66019100  | 2.91462500  | -0.95860400 |
| C  | 6.47081600  | 1.91330100  | -1.36447900 |
| C  | 6.41118400  | -0.50756600 | -1.13872900 |
| H  | 5.19757400  | -0.48577500 | 0.60710300  |
| H  | 4.55221700  | -1.41891800 | -0.72316300 |
| C  | 7.06555000  | 0.58192600  | -1.58369900 |
| O  | 7.04713400  | 2.93736700  | -1.70535700 |
| H  | 6.88036800  | -1.48764400 | -1.24909300 |
| C  | 8.39570500  | 0.54131900  | -2.25731300 |
| H  | 9.13085800  | 1.14341400  | -1.71021500 |
| H  | 8.77273400  | -0.48260100 | -2.34648600 |
| H  | 8.33895700  | 0.98072100  | -3.26036500 |
| C  | -0.22926700 | 4.40638000  | -2.71208300 |
| H  | -0.15181900 | 3.57178300  | -3.41753200 |
| H  | -0.18262200 | 5.34357200  | -3.28192600 |
| H  | 0.64211000  | 4.36144400  | -2.05095100 |
| C  | -2.72746300 | 4.46390300  | -2.87637100 |
| H  | -2.69843900 | 5.43025300  | -3.39546500 |
| H  | -2.70702800 | 3.67619600  | -3.63939200 |
| H  | -3.67522300 | 4.38822100  | -2.33463500 |
| C  | 1.07450600  | 2.08632200  | 3.93580100  |
| H  | 1.43464500  | 2.52457700  | 4.87558100  |
| H  | 1.27795300  | 1.00916700  | 3.96818300  |
| H  | 1.65726900  | 2.51329900  | 3.11159100  |
| C  | -1.19718100 | 1.73685900  | 4.93190000  |
| H  | -1.02751200 | 0.65396000  | 4.98815400  |
| H  | -0.87310100 | 2.17409400  | 5.88462300  |
| H  | -2.27270400 | 1.90582600  | 4.81950300  |
| C  | -0.89047800 | -2.94042500 | 3.22339500  |
| H  | -0.96255200 | -2.13202100 | 3.96248300  |
| H  | -0.89548200 | -3.89376700 | 3.76694200  |
| H  | 0.07755700  | -2.84469300 | 2.71563200  |
| C  | -3.38243300 | -3.00024900 | 2.96729300  |
| H  | -3.42098500 | -3.94889100 | 3.51869600  |
| H  | -3.50880100 | -2.18202700 | 3.68425500  |
| H  | -4.23048100 | -2.96676000 | 2.27623900  |
| C  | -2.65175900 | -0.16541600 | -4.53956300 |
| H  | -2.98924600 | -0.60259900 | -5.48764200 |
| H  | -2.91331000 | 0.90019000  | -4.55383900 |
| H  | -1.56175400 | -0.24963400 | -4.48471800 |
| C  | -4.83425800 | -0.74051100 | -3.44734400 |
| H  | -5.13456200 | 0.31269600  | -3.42911500 |
| H  | -5.19674700 | -1.18195600 | -4.38511400 |
| H  | -5.33559100 | -1.23949600 | -2.61242800 |
| H  | -1.81033100 | -2.42277100 | -3.50301300 |
| H  | -3.32733100 | -2.80263900 | -4.33027000 |

E-<sup>1</sup>PC<sub>1</sub>

|    |             |             |             |
|----|-------------|-------------|-------------|
| Rh | 1.04405600  | -2.47766600 | 1.09627100  |
| Rh | 0.34633600  | -0.45052400 | 0.03420200  |
| O  | 2.85300200  | -1.58004800 | 1.51656500  |
| C  | 3.05217900  | -0.38783300 | 1.13610700  |
| O  | 2.21474400  | 0.35392700  | 0.51972400  |
| O  | 1.80686100  | -3.10952900 | -0.72314200 |
| C  | 1.63153400  | -2.37335800 | -1.74061300 |
| O  | 1.03132400  | -1.24913500 | -1.75767500 |
| O  | -1.47340600 | -1.32341800 | -0.39032900 |
| C  | -1.64788800 | -2.55181800 | -0.08791100 |
| O  | -0.82091100 | -3.28172400 | 0.53436100  |
| O  | 0.27844300  | -1.71482300 | 2.88224900  |
| C  | -0.21265900 | -0.54357400 | 2.88727500  |

|    |             |             |             |
|----|-------------|-------------|-------------|
| O  | -0.32314900 | 0.22649200  | 1.88068000  |
| C  | 4.40356400  | 0.24810600  | 1.45904600  |
| C  | 4.97821800  | 0.87626900  | 0.16210900  |
| H  | 4.30151000  | 1.67962500  | -0.15951700 |
| H  | 5.93260000  | 1.35446700  | 0.42917100  |
| C  | 5.18172100  | -0.10628600 | -0.95803700 |
| C  | 4.12874400  | -0.42099300 | -1.82243600 |
| C  | 6.40598500  | -0.75855700 | -1.13341800 |
| C  | 4.26136100  | -1.39125300 | -2.82040400 |
| H  | 3.17706900  | 0.10068300  | -1.72034900 |
| C  | 6.56342200  | -1.70975000 | -2.13692800 |
| H  | 7.24260900  | -0.51154200 | -0.47842100 |
| C  | 5.49544300  | -2.03126200 | -2.96933600 |
| H  | 7.52485200  | -2.20324700 | -2.27093300 |
| H  | 5.61860400  | -2.78159700 | -3.75139800 |
| C  | 2.16825400  | -2.85701300 | -3.08812600 |
| C  | 3.08140000  | -1.74945100 | -3.67949700 |
| H  | 3.42183500  | -2.10577300 | -4.66300400 |
| H  | 2.46181000  | -0.85963200 | -3.85044300 |
| C  | -0.73378900 | -0.02138600 | 4.22791400  |
| C  | -2.98371600 | -3.17688600 | -0.48743900 |
| C  | -1.88023900 | -0.96055200 | 4.69187200  |
| H  | -1.43701300 | -1.93396300 | 4.93882000  |
| H  | -2.28143800 | -0.54235400 | 5.62702100  |
| C  | -3.73010400 | -3.54812300 | 0.82235800  |
| H  | -4.71568000 | -3.93996900 | 0.53210400  |
| H  | -3.18206100 | -4.37141600 | 1.29908900  |
| C  | -2.97767700 | -1.15012300 | 3.68338500  |
| C  | -2.90764800 | -2.21375900 | 2.78016300  |
| C  | -4.06358400 | -0.27219400 | 3.59523000  |
| C  | -3.87809300 | -2.41187100 | 1.79444200  |
| H  | -2.06994700 | -2.90917600 | 2.84813200  |
| C  | -5.03902400 | -0.45514200 | 2.61876100  |
| H  | -4.14877900 | 0.55093600  | 4.30607900  |
| C  | -4.94842400 | -1.51534600 | 1.71981500  |
| H  | -5.88533100 | 0.22858600  | 2.55267000  |
| H  | -5.71641100 | -1.63444800 | 0.95587400  |
| O  | -1.05475800 | 2.85446700  | -3.12461600 |
| S  | -0.07105200 | 2.27118500  | -2.24003600 |
| O  | 1.09713100  | 1.58590500  | -2.74505300 |
| N  | -0.82876400 | 1.23755300  | -1.09189400 |
| C  | 1.75661100  | 3.41458900  | -0.78714400 |
| H  | 2.04417800  | 2.41705000  | -0.42378400 |
| O  | 0.38793700  | 3.44878300  | -1.21599400 |
| H  | 2.41110600  | 3.71893100  | -1.61159500 |
| C  | 1.88200800  | 4.41517600  | 0.35043400  |
| Cl | 1.26340200  | 6.01274000  | -0.13335400 |
| Cl | 3.62113100  | 4.53887500  | 0.73775800  |
| Cl | 0.97858300  | 3.82190100  | 1.77361500  |
| C  | -5.62835800 | 2.00076300  | -3.31158000 |
| C  | -4.55841400 | 2.79093700  | -2.63518600 |
| C  | -6.29554200 | 0.97538700  | -2.74234500 |
| H  | -5.88107100 | 2.28379700  | -4.33636300 |
| C  | -3.90294900 | 1.99161200  | -1.51569200 |
| H  | -4.99872000 | 3.71884900  | -2.23071600 |
| H  | -3.80051700 | 3.11941000  | -3.35810100 |
| C  | -6.04451500 | 0.63077500  | -1.32794500 |
| C  | -7.34518800 | 0.17947300  | -3.44395500 |
| C  | -2.85322300 | 2.73377800  | -0.72756000 |
| C  | -4.98747700 | 1.42823300  | -0.59120400 |
| H  | -3.41843700 | 1.12212900  | -1.99968700 |
| O  | -6.70094600 | -0.23686100 | -0.76232700 |
| H  | -8.30102200 | 0.23249600  | -2.90967200 |
| H  | -7.49486300 | 0.52551300  | -4.47178800 |
| H  | -7.07797700 | -0.88414800 | -3.47004700 |
| C  | -2.86753800 | 4.04852000  | -0.49430800 |
| H  | -5.49323300 | 2.26754400  | -0.08445200 |
| H  | -4.57509700 | 0.79875300  | 0.20897500  |
| H  | -3.63670600 | 4.70777700  | -0.89229500 |
| H  | -2.08589600 | 4.52130300  | 0.09845300  |
| C  | -1.77547600 | 1.88371000  | -0.12366800 |
| H  | -1.33099000 | 0.53523900  | -1.64779900 |
| H  | -1.16020900 | 2.44310800  | 0.58544400  |
| H  | -2.19362500 | 1.02361900  | 0.42031900  |
| C  | 4.14678100  | 1.35416100  | 2.48748400  |
| H  | 3.78651500  | 0.93225400  | 3.43411600  |
| H  | 5.07516100  | 1.90127700  | 2.69605800  |
| H  | 3.40147400  | 2.07083500  | 2.12698400  |
| C  | 5.36779500  | -0.78095000 | 2.03718800  |
| H  | 6.32747500  | -0.29936400 | 2.26694300  |
| H  | 4.97292600  | -1.21565400 | 2.96062000  |
| H  | 5.55444300  | -1.60202400 | 1.33793700  |
| C  | 0.97057600  | -3.04657000 | -4.02485500 |

## ARTICLE

## Journal Name

|   |             |             |             |
|---|-------------|-------------|-------------|
| H | 1.31554700  | -3.37696300 | -5.01263400 |
| H | 0.28354400  | -3.81083300 | -3.64026900 |
| H | 0.41382800  | -2.11142200 | -4.14888200 |
| C | 2.92248200  | -4.17148200 | -2.93154700 |
| H | 2.26556000  | -4.96094000 | -2.55189400 |
| H | 3.31553200  | -4.49238100 | -3.90528300 |
| H | 3.76096400  | -4.07766800 | -2.23449400 |
| C | -2.71487400 | -4.45756800 | -1.27962900 |
| H | -3.66292400 | -4.95731500 | -1.51458900 |
| H | -2.20947700 | -4.24121600 | -2.22910700 |
| H | -2.08858600 | -5.15078500 | -0.70941600 |
| C | -3.81258200 | -2.20374600 | -1.31940400 |
| H | -3.29638700 | -1.93411600 | -2.24907400 |
| H | -4.77731700 | -2.65692400 | -1.58224900 |
| H | -4.01876000 | -1.28136700 | -0.76640200 |
| C | 0.40208100  | -0.08981300 | 5.25098600  |
| H | 1.23136200  | 0.57043600  | 4.96642500  |
| H | 0.04125800  | 0.23422000  | 6.23523300  |
| H | 0.79282800  | -1.10826100 | 5.34185600  |
| C | -1.23322400 | 1.41341700  | 4.10030400  |
| H | -1.61979900 | 1.75885900  | 5.06803100  |
| H | -0.42283300 | 2.08770400  | 3.80230600  |
| H | -2.03378700 | 1.50428600  | 3.35843700  |

O<sup>-1</sup>NR

|    |             |             |             |
|----|-------------|-------------|-------------|
| Rh | 2.42143500  | -0.98941200 | 0.72082900  |
| Rh | 0.83444600  | 0.41470700  | -0.43802500 |
| O  | 2.89303600  | 0.68810400  | 1.85893100  |
| C  | 2.38620900  | 1.80759200  | 1.55522700  |
| O  | 1.56758400  | 2.02436800  | 0.59749600  |
| O  | 3.81551800  | -0.44318500 | -0.69469400 |
| C  | 3.45674600  | 0.27835300  | -1.67197300 |
| O  | 2.28653900  | 0.76175900  | -1.84517200 |
| O  | 0.29339300  | -1.35367800 | -1.46243900 |
| C  | 0.92689100  | -2.43680600 | -1.25332200 |
| O  | 1.88452100  | -2.60488100 | -0.43493700 |
| O  | 1.00574600  | -1.53693800 | 2.10147000  |
| C  | -0.11000600 | -0.93911100 | 2.03023000  |
| O  | -0.43315800 | -0.05599100 | 1.17010900  |
| C  | 2.75164000  | 3.00336000  | 2.37755600  |
| C  | 4.47195600  | 0.62345900  | -2.71471100 |
| C  | -1.16757400 | -1.29741700 | 3.02697000  |
| C  | 0.47121300  | -3.63106800 | -2.03674100 |
| O  | -1.61654900 | 3.38132600  | -1.61861900 |
| S  | -1.59330300 | 2.33392100  | -0.60860400 |
| O  | -1.33806300 | 2.63603200  | 0.79104800  |
| N  | -0.69367400 | 1.15477300  | -1.31732500 |
| C  | -3.57542800 | 0.96576900  | 0.44492700  |
| H  | -2.77290000 | 0.82031500  | 1.17862800  |
| O  | -3.12932500 | 1.69528900  | -0.68207400 |
| H  | -4.40307700 | 1.51033900  | 0.91555000  |
| C  | -4.09024000 | -0.40131100 | 0.00282800  |
| Cl | -5.43931500 | -0.22397400 | -1.14231000 |
| Cl | -4.67671100 | -1.22623200 | 1.49427300  |
| Cl | -2.78141500 | -1.33981000 | -0.74022200 |
| H  | 5.38728800  | 0.04851100  | -2.56407500 |
| H  | 4.06460100  | 0.43450200  | -3.71189000 |
| H  | 3.56875800  | 2.76724900  | 3.06129200  |
| H  | 1.87524300  | 3.32372100  | 2.95089200  |
| H  | 1.24203100  | -4.40410500 | -2.04556600 |
| H  | -1.61855900 | -0.39076600 | 3.44217700  |
| H  | 0.20386500  | -3.34094600 | -3.05576100 |
| H  | -0.75339500 | -1.91373700 | 3.82693800  |
| H  | 3.02877800  | 3.83773600  | 1.72733500  |
| H  | 4.70141100  | 1.69278900  | -2.65954400 |
| H  | -0.42942500 | -4.04346900 | -1.56691400 |
| H  | -1.96656000 | -1.85083700 | 2.51919700  |

O<sup>-3</sup>NR

|    |             |             |             |
|----|-------------|-------------|-------------|
| Rh | 2.51264100  | -0.86707100 | 0.72229400  |
| Rh | 0.76956400  | 0.28901700  | -0.44930100 |
| O  | 2.77662600  | 0.79321400  | 1.91895900  |
| C  | 2.19864900  | 1.86227000  | 1.55089900  |
| O  | 1.44040900  | 1.98783000  | 0.53471800  |
| O  | 3.84093100  | -0.10778300 | -0.67044900 |
| C  | 3.37488000  | 0.46937200  | -1.69913700 |
| O  | 2.13993400  | 0.68459300  | -1.94189900 |
| O  | 0.31828900  | -1.51700100 | -1.36253600 |
| C  | 1.13522600  | -2.48837000 | -1.23750300 |
| O  | 2.16646400  | -2.49521600 | -0.49772700 |
| O  | 1.12481100  | -1.60592000 | 2.05658300  |
| C  | -0.04262500 | -1.11261600 | 2.00349200  |

|    |             |             |             |
|----|-------------|-------------|-------------|
| O  | -0.44205300 | -0.22399600 | 1.18062100  |
| C  | 2.40858900  | 3.09934100  | 2.36536400  |
| C  | 4.34442700  | 0.96731800  | -2.72502900 |
| C  | -1.06488600 | -1.61911900 | 2.97269900  |
| C  | 0.84192400  | -3.70836300 | -2.05294600 |
| O  | -1.80989300 | 3.54651500  | -1.41589000 |
| S  | -1.68604700 | 2.43448500  | -0.49717900 |
| O  | -1.40411300 | 2.64250800  | 0.91640600  |
| N  | -0.72070200 | 1.30925200  | -1.17889800 |
| C  | -3.54407700 | 0.85912500  | 0.48754700  |
| H  | -2.70173500 | 0.66782600  | 1.16288100  |
| O  | -3.17151700 | 1.69310700  | -0.59485800 |
| H  | -4.35522900 | 1.34381300  | 1.04392100  |
| C  | -4.05636800 | -0.47508200 | -0.04330200 |
| Cl | -5.43181300 | -0.22825500 | -1.14280500 |
| Cl | -4.59944100 | -1.40949100 | 1.39981200  |
| Cl | -2.75695800 | -1.34883200 | -0.87658000 |
| H  | 5.30515800  | 0.45781600  | -2.62871000 |
| H  | 3.93679100  | 0.83489300  | -3.73017200 |
| H  | 3.07708000  | 2.90367100  | 3.20565700  |
| H  | 1.43964400  | 3.45849800  | 2.72725600  |
| H  | 1.05780300  | -3.49903100 | -3.10621300 |
| H  | -1.82717900 | -2.18692300 | 2.42561900  |
| H  | -0.22088900 | -3.95877500 | -1.98689300 |
| H  | -1.57699300 | -0.78080900 | 3.45533600  |
| H  | 2.82573300  | 3.89114200  | 1.73540000  |
| H  | 4.50025200  | 2.04152600  | -2.57525300 |
| H  | 1.45137200  | -4.55145800 | -1.72307700 |
| H  | -0.60328400 | -2.26054100 | 3.72552800  |

**O-<sup>1</sup>TS1<sub>A</sub>**

|    |             |             |             |
|----|-------------|-------------|-------------|
| Rh | -0.24752000 | 0.78311000  | 0.17481400  |
| Rh | -0.71676200 | 2.98330000  | -0.68052300 |
| O  | -0.19503600 | 0.09645900  | -1.80030800 |
| C  | -0.56024100 | 0.90701900  | -2.71600500 |
| O  | -0.89258500 | 2.12062400  | -2.56291900 |
| O  | -2.28381300 | 0.45904200  | 0.26665700  |
| C  | -3.07199300 | 1.44439500  | 0.05227500  |
| O  | -2.72060400 | 2.60349100  | -0.30825000 |
| O  | -0.47353500 | 3.70873900  | 1.24814300  |
| C  | -0.41988900 | 2.85864600  | 2.19014800  |
| O  | -0.44724000 | 1.59036900  | 2.06648800  |
| O  | 1.77339200  | 1.40982700  | -0.01444300 |
| C  | 2.07854400  | 2.48355200  | -0.62041000 |
| O  | 1.26150800  | 3.35246700  | -1.05833200 |
| O  | 0.79490900  | -1.99540900 | 3.09162100  |
| S  | 1.42087100  | -1.06859700 | 2.16242900  |
| O  | 1.89905100  | 0.23406300  | 2.60779000  |
| N  | 0.67593000  | -0.92213500 | 0.70104700  |
| O  | 2.80264500  | -1.92392300 | 1.70050000  |
| C  | 3.81526900  | -1.13925100 | 1.10795500  |
| H  | 3.48392500  | -0.10747500 | 0.92801400  |
| H  | 4.68702500  | -1.12591300 | 1.77454500  |
| C  | 4.26897100  | -1.72646900 | -0.22642600 |
| Cl | 4.69334700  | -3.44741200 | -0.04860100 |
| Cl | 5.72510900  | -0.79085400 | -0.71904800 |
| Cl | 3.01384200  | -1.54320600 | -1.47889400 |
| C  | 0.22373600  | -3.01622800 | 0.28067000  |
| C  | -0.77293000 | -2.92914800 | -0.65962300 |
| H  | -0.01338000 | -3.17597000 | 1.32673400  |
| H  | 1.24679200  | -3.23135700 | -0.01750000 |
| C  | -0.46309700 | -3.04726300 | -2.10937800 |
| C  | -2.18913200 | -2.64802300 | -0.28744100 |
| H  | -0.58848400 | -4.08843500 | -2.44454100 |
| H  | 0.57187100  | -2.76142500 | -2.31973700 |
| H  | -1.13335000 | -2.43404400 | -2.72305200 |
| C  | -3.16813100 | -3.67930600 | -0.86891400 |
| C  | -2.45497800 | -2.47932200 | 1.20227900  |
| H  | -2.42710200 | -1.68137200 | -0.76978500 |
| H  | -2.98163800 | -4.66171300 | -0.40436900 |
| H  | -3.04767000 | -3.81662800 | -1.94932000 |
| C  | -4.61444300 | -3.30046300 | -0.60326800 |
| C  | -3.89696400 | -2.21634700 | 1.46790900  |
| H  | -2.14358500 | -3.38541900 | 1.75176000  |
| H  | -1.84356900 | -1.66516200 | 1.61305100  |
| C  | -4.90438000 | -2.55135100 | 0.63502300  |
| O  | -5.50446400 | -3.63899900 | -1.37165800 |
| H  | -4.13852400 | -1.71584000 | 2.40927300  |
| C  | -6.33956000 | -2.23980700 | 0.90392400  |
| H  | -6.94179500 | -3.15512600 | 0.94192300  |
| H  | -6.46422500 | -1.69820900 | 1.84770900  |
| H  | -6.77077200 | -1.63659800 | 0.09506600  |
| C  | -4.53289600 | 1.16742000  | 0.23554200  |

## ARTICLE

## Journal Name

|   |             |             |             |
|---|-------------|-------------|-------------|
| H | -4.84615000 | 0.37337100  | -0.45148800 |
| H | -4.72075300 | 0.79679900  | 1.24862900  |
| H | -5.12318700 | 2.06648000  | 0.05086300  |
| C | -0.62289200 | 0.34988400  | -4.10878700 |
| H | 0.15768400  | -0.40116200 | -4.25824400 |
| H | -1.59198600 | -0.14032800 | -4.26046900 |
| H | -0.52837600 | 1.14845900  | -4.84741100 |
| C | -0.30281100 | 3.36888000  | 3.59352000  |
| H | -1.09329800 | 2.93754500  | 4.21522000  |
| H | 0.65061800  | 3.03113800  | 4.01359100  |
| H | -0.35845300 | 4.45838600  | 3.62172400  |
| C | 3.54202100  | 2.72401800  | -0.83754100 |
| H | 4.07490200  | 2.65921900  | 0.11678000  |
| H | 3.94924500  | 1.93961100  | -1.48556400 |
| H | 3.71336300  | 3.70124000  | -1.29245900 |

O-<sup>3</sup>TS1A

|    |             |             |             |
|----|-------------|-------------|-------------|
| Rh | -0.04935500 | 0.79888700  | 0.24863800  |
| Rh | -0.36387900 | 2.95688000  | -0.77766700 |
| O  | -0.03486700 | -0.01043300 | -1.67879300 |
| C  | -0.19981100 | 0.76934000  | -2.67481300 |
| O  | -0.39605900 | 2.01975700  | -2.62344900 |
| O  | -2.12669800 | 0.63008800  | 0.31662700  |
| C  | -2.83813000 | 1.60206000  | -0.10900100 |
| O  | -2.40079800 | 2.68961600  | -0.58813400 |
| O  | -0.28978700 | 3.81687400  | 1.09725700  |
| C  | -0.21290900 | 3.04292500  | 2.10090600  |
| O  | -0.15333300 | 1.77156700  | 2.06968000  |
| O  | 1.99385000  | 1.18469800  | 0.10175400  |
| C  | 2.40634200  | 2.24485800  | -0.47418900 |
| O  | 1.67962700  | 3.16916100  | -0.94820900 |
| O  | 0.71668400  | -2.21995900 | 3.23981200  |
| S  | 1.32714300  | -1.26835600 | 2.32666500  |
| O  | 1.93134900  | -0.03797000 | 2.81109200  |
| N  | 0.33318200  | -1.00885600 | 1.05396800  |
| O  | 2.56906800  | -2.17925300 | 1.65239900  |
| C  | 3.65796900  | -1.46107500 | 1.10973400  |
| H  | 3.44463100  | -0.38640500 | 1.04144300  |
| H  | 4.54175600  | -1.62058000 | 1.74019800  |
| C  | 3.97714400  | -1.98093500 | -0.28783700 |
| Cl | 4.27471600  | -3.73822400 | -0.25570200 |
| Cl | 5.46567600  | -1.13210400 | -0.82715600 |
| Cl | 2.63839300  | -1.61991000 | -1.40718200 |
| C  | -0.19338300 | -2.96421000 | 0.40133300  |
| C  | -1.16390100 | -2.84208900 | -0.57692000 |
| H  | -0.46624400 | -3.15986600 | 1.43333400  |
| H  | 0.81390700  | -3.26530700 | 0.12123700  |
| C  | -0.82988300 | -3.02954800 | -2.01618800 |
| C  | -2.56370400 | -2.43013600 | -0.24415400 |
| H  | -1.20922900 | -3.99695500 | -2.37908700 |
| H  | 0.25121500  | -3.01401700 | -2.18705500 |
| H  | -1.29713500 | -2.25843300 | -2.64290400 |
| C  | -3.63829000 | -3.28676600 | -0.92339600 |
| C  | -2.86455000 | -2.31842800 | 1.24556100  |
| H  | -2.66335700 | -1.40841400 | -0.65896900 |
| H  | -3.60896100 | -4.30861000 | -0.50906900 |
| H  | -3.48493800 | -3.38171700 | -2.00410600 |
| C  | -5.02908200 | -2.72522000 | -0.69587800 |
| C  | -4.27912800 | -1.92098800 | 1.49066000  |
| H  | -2.66731100 | -3.28283500 | 1.74726000  |
| H  | -2.18591300 | -1.59595400 | 1.71902800  |
| C  | -5.28408500 | -2.06681500 | 0.60245500  |
| O  | -5.90957900 | -2.83852600 | -1.53834100 |
| H  | -4.50099000 | -1.47307400 | 2.46305100  |
| C  | -6.68024700 | -1.59983100 | 0.84826600  |
| H  | -7.39610400 | -2.42604600 | 0.76525500  |
| H  | -6.78467000 | -1.14193200 | 1.83763900  |
| H  | -6.98576400 | -0.86690100 | 0.09080000  |
| C  | -4.32463700 | 1.41641300  | -0.04953200 |
| H  | -4.63074000 | 0.67072600  | -0.79359600 |
| H  | -4.62387600 | 1.02790600  | 0.92857900  |
| H  | -4.83761900 | 2.35700800  | -0.25871800 |
| C  | -0.17851300 | 0.13007600  | -4.03257700 |
| H  | 0.42562500  | -0.78116800 | -4.02316300 |
| H  | -1.20027900 | -0.14103000 | -4.32359400 |
| H  | 0.20259500  | 0.83233300  | -4.77746600 |
| C  | -0.20788700 | 3.66454600  | 3.46431500  |
| H  | -1.18087600 | 3.50301400  | 3.94110000  |
| H  | 0.54571200  | 3.18124500  | 4.09197900  |
| H  | -0.02179100 | 4.73813500  | 3.39764900  |
| C  | 3.89236400  | 2.37838600  | -0.60972700 |
| H  | 4.37957600  | 2.18118900  | 0.35045400  |
| H  | 4.25838100  | 1.62470300  | -1.31659800 |



H 4.16227800 3.37282200 -0.96979400

**O<sup>-1</sup>TS1<sub>1</sub>**

Rh -0.74798500 -3.04196600 -0.04071000  
 Rh -0.14854500 -0.71582900 0.08711600  
 O -2.04903600 -2.70260900 1.52568400  
 C -2.19814300 -1.53057800 1.97753800  
 O -1.53155600 -0.50440800 1.59825600  
 O 0.80318000 -3.47397700 1.27011900  
 C 1.49281400 -2.50667600 1.71759700  
 O 1.32508600 -1.27045000 1.45961200  
 O 1.21127000 -1.19191700 -1.42678200  
 C 1.24955300 -2.34959100 -1.95115000  
 O 0.53394500 -3.34237400 -1.61639200  
 O -2.24925300 -2.48134100 -1.35010600  
 C -2.42682000 -1.25215900 -1.60985200  
 O -1.69979900 -0.28251600 -1.20894900  
 C 2.24446200 -2.53230500 -3.05599400  
 C 2.62513000 -2.82782100 2.64788600  
 C -3.62225600 -0.89608200 -2.43545700  
 C -3.25190200 -1.28904700 3.00882200  
 H 3.79448900 1.08854600 -2.03565100  
 C 3.36674400 1.21327900 -1.03211500  
 H 2.78553100 0.31738800 -0.77759100  
 O 2.57950800 2.38800900 -0.97545800  
 C 4.50520200 1.32583700 -0.02908300  
 S 0.93903900 2.09603100 -1.10549700  
 Cl 5.55694700 2.70881500 -0.42683800  
 Cl 5.44889200 -0.20297400 -0.15616000  
 Cl 3.88209000 1.50053500 1.62581100  
 O 0.37637800 3.42457600 -0.92059800  
 O 0.75416700 1.37296700 -2.35337800  
 N 0.70148100 1.11162700 0.18876400  
 H 0.28491700 1.86923400 1.22729100  
 C -0.34251400 2.45759600 2.14824200  
 C -1.18449300 3.46368900 1.53089500  
 H 0.45456600 2.82882800 2.79837200  
 H -0.84108200 1.56877900 2.54565900  
 C -2.28291900 2.96368200 0.62566100  
 C -0.89803000 4.77397100 1.70878700  
 C -2.92247100 4.04155600 -0.23778700  
 C -3.37497100 2.17807800 1.36023700  
 H -1.79827400 2.24781200 -0.06187600  
 H -1.47855700 5.57184700 1.25301400  
 H -0.05346600 5.08018900 2.32199600  
 C -4.07913500 3.53018500 -1.02453600  
 H -3.28325800 4.87414300 0.39301500  
 H -2.16898800 4.48225600 -0.90534700  
 C -4.33265000 1.54464600 0.37380100  
 H -3.94886300 2.86465500 2.00526800  
 H -2.95761100 1.39205400 1.99710500  
 C -4.74113900 2.38191300 -0.77253400  
 H -4.41074000 4.14905700 -1.86201900  
 O -4.78028400 0.41182300 0.53157500  
 C -5.90521600 1.91566100 -1.58421400  
 H -6.79602700 1.78764400 -0.95672900  
 H -6.14322700 2.62445200 -2.38396500  
 H -5.71700000 0.93637400 -2.03767800  
 H -4.49188900 -0.86971300 -1.76785500  
 H -3.80129600 -1.65703300 -3.19882900  
 H -3.50232200 0.08969700 -2.89112900  
 H 2.17450500 -3.53442100 -3.48257000  
 H 3.25580500 -2.36999900 -2.66684100  
 H 2.07456600 -1.77887100 -3.83149100  
 H 2.73618700 -3.90642600 2.77104700  
 H 3.55308700 -2.39588400 2.25934100  
 H 2.44343800 -2.36426800 3.62298400  
 H -4.09563700 -0.79456900 2.50898900  
 H -2.88207800 -0.61524400 3.78794600  
 H -3.58903700 -2.22931600 3.44890800

**O<sup>-3</sup>TS1<sub>1</sub>**

Rh -0.35654900 -3.09339200 0.10745600  
 Rh 0.01542300 -0.72400700 -0.01999100  
 O -1.62733100 -2.74836900 1.69846100  
 C -1.81823000 -1.55948300 2.09172200  
 O -1.24376800 -0.51618100 1.62682900  
 O 1.25762000 -3.22436800 1.39010300  
 C 1.90457700 -2.16886500 1.66646700  
 O 1.64246000 -1.00072300 1.22753900  
 O 1.27984200 -1.12885500 -1.61975500  
 C 1.46542900 -2.33295900 -1.99320500  
 O 0.91734200 -3.36346900 -1.49845300

|    |             |             |             |
|----|-------------|-------------|-------------|
| O  | -1.96769700 | -2.86815500 | -1.14705100 |
| C  | -2.30353800 | -1.69365500 | -1.49693000 |
| O  | -1.66006300 | -0.62556500 | -1.23355500 |
| C  | 2.43202000  | -2.51844600 | -3.12320100 |
| C  | 3.07840300  | -2.27836600 | 2.58952600  |
| C  | -3.58372200 | -1.53295600 | -2.24997900 |
| C  | -2.82384900 | -1.33760400 | 3.17621700  |
| H  | 3.65594900  | 1.39705100  | -2.03684300 |
| C  | 3.12789400  | 1.47940600  | -1.07809200 |
| H  | 2.58457600  | 0.54539600  | -0.89377800 |
| O  | 2.26757300  | 2.60211200  | -1.08636400 |
| C  | 4.16128300  | 1.64238000  | 0.02728400  |
| S  | 0.66072600  | 2.22366700  | -1.35676200 |
| Cl | 5.21541200  | 3.04192600  | -0.29808500 |
| Cl | 5.14917300  | 0.13432700  | 0.01226700  |
| Cl | 3.38438900  | 1.83552900  | 1.61338000  |
| O  | 0.01222200  | 3.51676400  | -1.22983000 |
| O  | 0.60436600  | 1.46704500  | -2.59607800 |
| N  | 0.30259600  | 1.26738000  | -0.09301200 |
| H  | -0.01261700 | 2.00311100  | 0.98105800  |
| C  | -0.55363600 | 2.62546100  | 1.99081700  |
| C  | -1.53128300 | 3.51377400  | 1.39798200  |
| H  | 0.25846900  | 3.10392000  | 2.54323100  |
| H  | -0.92315500 | 1.71463000  | 2.47127500  |
| C  | -2.61843400 | 2.86391400  | 0.57430000  |
| C  | -1.38533600 | 4.85839100  | 1.49856100  |
| C  | -3.51210000 | 3.83036400  | -0.18935600 |
| C  | -3.49179500 | 1.88943400  | 1.36930000  |
| H  | -2.08747500 | 2.25839800  | -0.18201200 |
| H  | -2.07613600 | 5.56221200  | 1.04135100  |
| H  | -0.54731900 | 5.28700800  | 2.04432300  |
| C  | -4.61691400 | 3.13013800  | -0.90353900 |
| H  | -3.95258700 | 4.57113100  | 0.50282200  |
| H  | -2.91382500 | 4.41561300  | -0.90234800 |
| C  | -4.39673800 | 1.10760600  | 0.44513500  |
| H  | -4.12216600 | 2.45479300  | 2.07653000  |
| H  | -2.89758100 | 1.17877900  | 1.94886500  |
| C  | -5.02478500 | 1.86806300  | -0.65495700 |
| H  | -5.12204500 | 3.69325900  | -1.69230100 |
| O  | -4.63333200 | -0.08609900 | 0.61855500  |
| C  | -6.11866900 | 1.19718000  | -1.41953600 |
| H  | -6.89006100 | 0.80496500  | -0.74597100 |
| H  | -6.58947700 | 1.88589400  | -2.12853200 |
| H  | -5.74515800 | 0.33463400  | -1.98394600 |
| H  | -4.38055000 | -1.37332400 | -1.51181100 |
| H  | -3.81222300 | -2.43317900 | -2.82450900 |
| H  | -3.54037200 | -0.65617000 | -2.90131700 |
| H  | 2.12386100  | -1.90656500 | -3.97643400 |
| H  | 2.49351900  | -3.56776200 | -3.41669700 |
| H  | 3.42241900  | -2.16399800 | -2.81639400 |
| H  | 3.22997100  | -3.31260000 | 2.90381900  |
| H  | 3.97851600  | -1.90236800 | 2.09186400  |
| H  | 2.91506400  | -1.64393800 | 3.46656900  |
| H  | -3.74779400 | -0.98611300 | 2.69925700  |
| H  | -2.48360400 | -0.56204200 | 3.86903300  |
| H  | -3.02720900 | -2.26618800 | 3.71338800  |

**O-<sup>3</sup>IM<sub>A-S</sub>**

|    |             |             |             |
|----|-------------|-------------|-------------|
| Rh | -0.01320200 | -3.18019100 | -0.28453100 |
| Rh | -0.02599100 | -0.80868500 | 0.07911500  |
| O  | -2.04197300 | -3.21482200 | 0.09174800  |
| C  | -2.59409900 | -2.14243700 | 0.48701000  |
| O  | -2.01092100 | -1.02381900 | 0.66894600  |
| O  | 0.36935300  | -3.42716200 | 1.72908600  |
| C  | 0.65865600  | -2.39675500 | 2.41320100  |
| O  | 0.67798100  | -1.19746800 | 1.98547800  |
| O  | 1.94484600  | -0.77786200 | -0.56959800 |
| C  | 2.54564900  | -1.89069500 | -0.74297200 |
| O  | 2.01574200  | -3.03945900 | -0.66014500 |
| O  | -0.41655900 | -2.83306800 | -2.28572000 |
| C  | -0.67757300 | -1.64597300 | -2.64671100 |
| O  | -0.63473800 | -0.60984000 | -1.90384600 |
| O  | 0.16395400  | 3.09107000  | 2.04846600  |
| S  | -0.67345200 | 1.97970900  | 1.64005100  |
| O  | -1.11588000 | 0.96806200  | 2.57714600  |
| N  | -0.05378400 | 1.24560100  | 0.30025300  |
| C  | -3.25458000 | 2.05313900  | 1.10647200  |
| H  | -3.09919200 | 0.99389300  | 1.34749300  |
| O  | -2.03309800 | 2.76630300  | 1.05692000  |
| H  | -3.90049200 | 2.51103800  | 1.86570600  |
| C  | -3.96737900 | 2.14698700  | -0.23761300 |
| Cl | -4.18672300 | 3.84743700  | -0.71479000 |
| Cl | -5.57470700 | 1.37095500  | -0.01599700 |

|    |             |             |             |
|----|-------------|-------------|-------------|
| Cl | -3.04942500 | 1.28010500  | -1.49165000 |
| C  | 4.47386400  | 1.25738400  | 1.11614800  |
| C  | 3.11732100  | 1.86254700  | 0.99979200  |
| C  | 5.49395200  | 1.49282500  | 0.26480800  |
| H  | 4.63331700  | 0.55913700  | 1.94374500  |
| C  | 2.84105800  | 2.35593200  | -0.43341900 |
| H  | 3.00731500  | 2.70181800  | 1.70800100  |
| H  | 2.35829900  | 1.12897000  | 1.30155200  |
| C  | 5.32701600  | 2.47480300  | -0.82875700 |
| C  | 6.82544900  | 0.82439100  | 0.36186700  |
| C  | 1.50753800  | 3.01836000  | -0.56673700 |
| C  | 4.01499400  | 3.22852700  | -0.87877400 |
| H  | 2.83319400  | 1.44982800  | -1.06136000 |
| O  | 6.22442300  | 2.68602500  | -1.63497100 |
| H  | 7.63101600  | 1.55913100  | 0.47849700  |
| H  | 6.86514000  | 0.12465700  | 1.20397700  |
| H  | 7.05716300  | 0.27651100  | -0.56040100 |
| H  | 4.10170300  | 4.10088100  | -0.20948400 |
| H  | 3.88339200  | 3.62481200  | -1.89254700 |
| C  | 0.32529600  | 2.14557500  | -0.82244500 |
| H  | -0.55541400 | 2.74782000  | -1.09365500 |
| H  | 0.51758300  | 1.45045500  | -1.65128800 |
| C  | 1.35269100  | 4.47418100  | -0.31270300 |
| H  | 1.75551100  | 4.76272400  | 0.67053300  |
| H  | 1.89387500  | 5.07912900  | -1.05800700 |
| H  | 0.30139600  | 4.78128700  | -0.32747800 |
| C  | -4.06851500 | -2.16674800 | 0.74828700  |
| H  | -4.44513700 | -3.19100900 | 0.76530000  |
| H  | -4.29492800 | -1.66466100 | 1.69401900  |
| H  | -4.58146000 | -1.60713600 | -0.04306500 |
| C  | 0.99204200  | -2.58812700 | 3.86025700  |
| H  | 0.15448700  | -2.22963800 | 4.46846000  |
| H  | 1.17382600  | -3.64106000 | 4.08292500  |
| H  | 1.86330800  | -1.98539800 | 4.13048400  |
| C  | 4.01135600  | -1.81337900 | -1.04307100 |
| H  | 4.55685900  | -1.61883200 | -0.11186200 |
| H  | 4.36952100  | -2.75108400 | -1.47194300 |
| H  | 4.22421000  | -0.97702000 | -1.71554400 |
| C  | -1.10334100 | -1.43546500 | -4.06821400 |
| H  | -0.50764400 | -2.06029400 | -4.73865700 |
| H  | -2.14903600 | -1.74537800 | -4.17707200 |
| H  | -1.02124600 | -0.38427600 | -4.35241000 |

**O<sup>-3</sup>IMA-R**

|    |             |             |             |
|----|-------------|-------------|-------------|
| Rh | 1.39766800  | -0.50330900 | -0.12192700 |
| Rh | 3.71697600  | -0.69789500 | 0.48281900  |
| O  | 1.03546400  | 0.04656800  | 1.85612900  |
| C  | 2.01224800  | 0.13356700  | 2.67131100  |
| O  | 3.22491400  | -0.13298000 | 2.41334200  |
| O  | 1.15110900  | -2.47881400 | 0.46177000  |
| C  | 2.17336800  | -3.12743800 | 0.86360500  |
| O  | 3.35450900  | -2.67536500 | 0.95834500  |
| O  | 4.12466000  | -1.23428700 | -1.45990800 |
| C  | 3.15789300  | -1.34773800 | -2.27716000 |
| O  | 1.92893400  | -1.14833400 | -2.01386500 |
| O  | 1.80410700  | 1.47431700  | -0.60376500 |
| C  | 2.97647700  | 1.94180200  | -0.42523500 |
| O  | 3.98264700  | 1.29189700  | -0.00722100 |
| O  | -2.34437000 | -0.32095000 | -2.43173400 |
| S  | -1.20498300 | 0.39424300  | -1.88784000 |
| O  | -0.09443000 | 0.81561300  | -2.71591000 |
| N  | -0.61787800 | -0.35393700 | -0.54453300 |
| O  | -1.94023100 | 1.78061500  | -1.28417100 |
| C  | -1.13517600 | 2.93923100  | -1.18056800 |
| H  | -0.06839900 | 2.70655000  | -1.29201600 |
| H  | -1.43880600 | 3.65681700  | -1.95319200 |
| C  | -1.34490700 | 3.58490400  | 0.18288600  |
| Cl | -3.07392900 | 3.92370100  | 0.46158300  |
| Cl | -0.42096000 | 5.12479900  | 0.17578600  |
| Cl | -0.72383400 | 2.51683800  | 1.46101100  |
| C  | -1.61107700 | -0.78319300 | 0.47332100  |
| C  | -2.56621100 | -1.81694400 | -0.01120900 |
| H  | -2.12273400 | 0.11062500  | 0.85809900  |
| H  | -0.98429000 | -1.17101500 | 1.28949300  |
| C  | -1.98708000 | -3.10192100 | -0.48614000 |
| C  | -4.03954500 | -1.59326600 | -0.14423700 |
| H  | -1.57878500 | -3.70474500 | 0.34150800  |
| H  | -1.14009500 | -2.92326200 | -1.16565300 |
| H  | -2.72663200 | -3.71450500 | -1.01448500 |
| C  | -4.83465400 | -2.58853000 | 0.71650300  |
| C  | -4.53146600 | -0.18184500 | 0.16051100  |
| H  | -4.30430700 | -1.79902500 | -1.19887500 |
| H  | -4.62409300 | -2.38690500 | 1.78068700  |

## ARTICLE

## Journal Name

|   |             |             |             |
|---|-------------|-------------|-------------|
| H | -4.54158200 | -3.62902500 | 0.53463400  |
| C | -6.33194100 | -2.47391600 | 0.51104100  |
| C | -6.01851200 | -0.08558600 | 0.08824900  |
| H | -4.20641000 | 0.12853600  | 1.17116400  |
| H | -4.07425200 | 0.54416200  | -0.52492800 |
| C | -6.86441300 | -1.12850500 | 0.21278700  |
| O | -7.07089900 | -3.44267700 | 0.62874200  |
| H | -6.43673500 | 0.91040300  | -0.07806800 |
| C | -8.34815100 | -1.01094100 | 0.09887100  |
| H | -8.84250700 | -1.36907400 | 1.01007800  |
| H | -8.65827200 | 0.02224000  | -0.08893500 |
| H | -8.72924900 | -1.64234400 | -0.71283500 |
| C | 3.15151300  | 3.39927100  | -0.72335800 |
| H | 4.20581200  | 3.67994400  | -0.69951100 |
| H | 2.71852900  | 3.63918000  | -1.69946000 |
| H | 2.60432900  | 3.98504100  | 0.02434300  |
| C | 3.48158800  | -1.73285200 | -3.68754200 |
| H | 3.38821600  | -0.85010900 | -4.32928700 |
| H | 4.49978800  | -2.11976200 | -3.75992000 |
| H | 2.76406500  | -2.47215900 | -4.05275200 |
| C | 1.68881800  | 0.63118300  | 4.04742100  |
| H | 1.80072800  | 1.72191300  | 4.06298100  |
| H | 0.65541000  | 0.39769900  | 4.31399100  |
| H | 2.38082700  | 0.21345200  | 4.78185200  |
| C | 1.93654700  | -4.55545200 | 1.25215100  |
| H | 1.16530100  | -4.60590300 | 2.02739800  |
| H | 1.55884100  | -5.11438200 | 0.38962200  |
| H | 2.85627400  | -5.01705300 | 1.61533700  |

O-<sup>3</sup>IM<sub>1</sub>

|    |             |             |             |
|----|-------------|-------------|-------------|
| Rh | -0.21107800 | -3.06074400 | -0.09645500 |
| Rh | 0.03831700  | -0.69501700 | 0.17488100  |
| O  | -1.79814600 | -2.99287700 | 1.21396200  |
| C  | -2.14211300 | -1.87657000 | 1.70798200  |
| O  | -1.54442200 | -0.76331600 | 1.51588900  |
| O  | 1.11533000  | -3.35559100 | 1.45491900  |
| C  | 1.61141000  | -2.33586100 | 2.02503700  |
| O  | 1.34569900  | -1.12294200 | 1.74333600  |
| O  | 1.61048300  | -0.79792000 | -1.17758700 |
| C  | 1.95383000  | -1.93156800 | -1.64665000 |
| O  | 1.38005400  | -3.03898600 | -1.41077300 |
| O  | -1.52821700 | -2.68831900 | -1.61981400 |
| C  | -1.84836500 | -1.48602200 | -1.88016500 |
| O  | -1.35200100 | -0.45132300 | -1.32754500 |
| C  | 3.16517000  | -1.94886000 | -2.52675000 |
| C  | 2.62629900  | -2.56576300 | 3.10246100  |
| C  | -2.92367900 | -1.26756000 | -2.89139000 |
| C  | -3.36926400 | -1.84223800 | 2.56000200  |
| H  | 3.58273400  | 2.81067700  | -1.94489100 |
| C  | 3.14925200  | 2.17585300  | -1.16197600 |
| H  | 2.73392200  | 1.26900500  | -1.61729500 |
| O  | 2.16541700  | 2.91250800  | -0.46477700 |
| C  | 4.26757000  | 1.76741100  | -0.21030100 |
| S  | 0.57145200  | 2.45505700  | -0.69830100 |
| Cl | 4.99779000  | 3.19499400  | 0.56229500  |
| Cl | 5.50973200  | 0.93575600  | -1.21773700 |
| Cl | 3.64817400  | 0.65323500  | 1.02367000  |
| O  | -0.13085500 | 3.68199300  | -0.36788400 |
| O  | 0.49114400  | 1.84250100  | -2.00927400 |
| N  | 0.29326100  | 1.32216700  | 0.43172500  |
| H  | 0.16820200  | 1.74046900  | 1.35971700  |
| C  | -1.70599700 | 2.30638900  | 2.91333700  |
| C  | -2.30945900 | 3.17688600  | 2.00531400  |
| H  | -1.23998500 | 2.69130200  | 3.81910000  |
| H  | -1.69809500 | 1.22802400  | 2.76229100  |
| C  | -2.95094500 | 2.58622100  | 0.75938500  |
| C  | -2.29348100 | 4.54031300  | 2.23735600  |
| C  | -3.55909300 | 3.61352600  | -0.18718400 |
| C  | -4.00421100 | 1.52572700  | 1.09628100  |
| H  | -2.15285200 | 2.06776000  | 0.20455200  |
| H  | -2.69820000 | 5.26542100  | 1.53803200  |
| H  | -1.81659400 | 4.93832400  | 3.13110100  |
| C  | -4.36708200 | 2.99969100  | -1.27703100 |
| H  | -4.22006600 | 4.29828100  | 0.37494700  |
| H  | -2.77144600 | 4.25098000  | -0.61227800 |
| C  | -4.51467500 | 0.84438800  | -0.15127900 |
| H  | -4.85943200 | 2.00912700  | 1.59897800  |
| H  | -3.61273100 | 0.76804900  | 1.77969000  |
| C  | -4.81839900 | 1.72857000  | -1.29437400 |
| H  | -4.61843600 | 3.64958800  | -2.11937000 |
| O  | -4.70704400 | -0.36947800 | -0.20553100 |
| C  | -5.64866500 | 1.17245700  | -2.40499900 |
| H  | -6.58172000 | 0.74210900  | -2.02086700 |

|   |             |             |             |
|---|-------------|-------------|-------------|
| H | -5.89916300 | 1.94548700  | -3.13892400 |
| H | -5.13887000 | 0.35948500  | -2.93290000 |
| H | -3.88306500 | -1.29914800 | -2.35931200 |
| H | -2.91275900 | -2.06267600 | -3.64032800 |
| H | -2.81970700 | -0.28699700 | -3.36233700 |
| H | 3.17220200  | -2.84033400 | -3.15713000 |
| H | 4.06106800  | -1.96276700 | -1.89468200 |
| H | 3.21110900  | -1.04506500 | -3.14005400 |
| H | 2.43851100  | -3.51267400 | 3.61367500  |
| H | 3.62134700  | -2.62092100 | 2.64510300  |
| H | 2.63095500  | -1.73721100 | 3.81433700  |
| H | -4.20280800 | -1.52717300 | 1.91815200  |
| H | -3.26467400 | -1.10962500 | 3.36554000  |
| H | -3.58626600 | -2.83203700 | 2.96715900  |

**O<sup>-3</sup>TS<sub>A-s</sub>**

|    |             |             |             |
|----|-------------|-------------|-------------|
| Rh | -0.38892700 | -3.15235600 | 0.31661300  |
| Rh | -0.13412300 | -0.76024200 | -0.17319200 |
| O  | 1.61926600  | -3.40596500 | -0.10490600 |
| C  | 2.30910400  | -2.39146100 | -0.43526200 |
| O  | 1.87730800  | -1.20252900 | -0.56280400 |
| O  | -0.85238400 | -3.42295100 | -1.67831400 |
| C  | -0.89439600 | -2.41409000 | -2.45272100 |
| O  | -0.66929800 | -1.20652700 | -2.12817900 |
| O  | -2.18423100 | -0.58740200 | 0.29125600  |
| C  | -2.84208100 | -1.61920900 | 0.64305500  |
| O  | -2.38508500 | -2.79928800 | 0.73353900  |
| O  | 0.10539800  | -2.73138600 | 2.28975000  |
| C  | 0.35848200  | -1.53352900 | 2.62036800  |
| O  | 0.30954300  | -0.51653000 | 1.85362100  |
| O  | 0.54890300  | 3.29493700  | -2.36451800 |
| S  | 1.03383800  | 2.07408800  | -1.74643600 |
| O  | 1.32226900  | 0.90525800  | -2.55268700 |
| N  | 0.08921400  | 1.56299000  | -0.48354100 |
| C  | 3.53951500  | 1.66035600  | -0.99495400 |
| H  | 3.20575700  | 0.64263700  | -1.23372900 |
| O  | 2.47513100  | 2.58952400  | -1.04348400 |
| H  | 4.31467400  | 1.97106800  | -1.70709800 |
| C  | 4.15841600  | 1.65301000  | 0.39828800  |
| Cl | 4.64726100  | 3.30068000  | 0.87887600  |
| Cl | 5.60738600  | 0.59825300  | 0.32001200  |
| Cl | 3.00627500  | 0.99786300  | 1.58746200  |
| C  | -4.34618500 | 1.73087600  | -1.09574000 |
| C  | -2.93443500 | 2.20117900  | -1.13157700 |
| C  | -5.20697600 | 1.94142300  | -0.07896800 |
| H  | -4.68600100 | 1.15165000  | -1.95877100 |
| C  | -2.41254400 | 2.54458600  | 0.27119500  |
| H  | -2.84557000 | 3.07466200  | -1.80105000 |
| H  | -2.29146200 | 1.42709000  | -1.57062500 |
| C  | -4.79141600 | 2.76208600  | 1.07595600  |
| C  | -6.59381200 | 1.39018600  | -0.03999400 |
| C  | -1.05815100 | 3.16543800  | 0.25389000  |
| C  | -3.43717100 | 3.44162000  | 0.98219800  |
| H  | -2.35147100 | 1.59351100  | 0.81728300  |
| O  | -5.51785900 | 2.92148100  | 2.04746100  |
| H  | -7.33747300 | 2.19013400  | 0.05658900  |
| H  | -6.82133300 | 0.80716200  | -0.93889700 |
| H  | -6.73576800 | 0.74754100  | 0.83815200  |
| H  | -3.56946100 | 4.37828400  | 0.41604100  |
| H  | -3.12145900 | 3.72138400  | 1.99411600  |
| C  | 0.08625200  | 2.39613100  | 0.74611500  |
| H  | 1.00741400  | 2.96865300  | 0.90383300  |
| H  | -0.09826700 | 1.73599200  | 1.59990700  |
| C  | -0.88174000 | 4.53598100  | -0.27070500 |
| H  | -1.39592800 | 4.70692200  | -1.22425300 |
| H  | -1.32785100 | 5.23207700  | 0.46012300  |
| H  | 0.16809400  | 4.80818000  | -0.39400000 |
| C  | 3.77479600  | -2.60204900 | -0.67142500 |
| H  | 3.99816600  | -3.65998400 | -0.82227300 |
| H  | 4.11260800  | -2.01575200 | -1.53090100 |
| H  | 4.33135700  | -2.24547100 | 0.20337000  |
| C  | -1.24344400 | -2.68140200 | -3.88665600 |
| H  | -0.52567500 | -3.38994700 | -4.31152700 |
| H  | -2.23005600 | -3.15190200 | -3.94642500 |
| H  | -1.23594300 | -1.75871400 | -4.46904100 |
| C  | -4.29415100 | -1.41458300 | 0.96331100  |
| H  | -4.84471000 | -1.19903200 | 0.04019100  |
| H  | -4.71870100 | -2.30397800 | 1.43276000  |
| H  | -4.41995900 | -0.54538300 | 1.61759700  |
| C  | 0.78329700  | -1.29353100 | 4.03876700  |
| H  | 0.20071800  | -1.91602900 | 4.72261800  |
| H  | 1.83469200  | -1.58372600 | 4.14816800  |
| H  | 0.68743600  | -0.23905900 | 4.30698400  |

**O<sup>-3</sup>TS<sub>2A,R</sub>**

|    |             |             |             |
|----|-------------|-------------|-------------|
| Rh | -3.70752400 | -0.67676800 | -0.58411100 |
| Rh | -1.42981000 | -0.52429800 | 0.32307800  |
| O  | -3.24404600 | -2.52087500 | -1.40334500 |
| C  | -2.05264300 | -2.94550200 | -1.30791400 |
| O  | -1.08760100 | -2.34018500 | -0.74180300 |
| O  | -3.02634100 | 0.28090200  | -2.30287100 |
| C  | -1.83970300 | 0.72281200  | -2.32491000 |
| O  | -0.95855700 | 0.56600700  | -1.41477100 |
| O  | -2.06753000 | 1.27555700  | 1.20057200  |
| C  | -3.22497300 | 1.73575200  | 0.95428600  |
| O  | -4.11585700 | 1.16685100  | 0.24912000  |
| O  | -4.23012700 | -1.60733800 | 1.18921800  |
| C  | -3.33021200 | -1.86509500 | 2.04973100  |
| O  | -2.08869100 | -1.60192800 | 1.94908400  |
| C  | -1.74905000 | -4.28896700 | -1.90524900 |
| C  | -1.40739700 | 1.50658700  | -3.52915300 |
| C  | -3.77377200 | -2.52725000 | 3.31959500  |
| C  | -3.57032900 | 3.07528400  | 1.53380000  |
| O  | 2.81659100  | -0.20575000 | 2.29896200  |
| S  | 1.53113300  | 0.18318800  | 1.74786200  |
| O  | 0.38147700  | 0.37159800  | 2.61535900  |
| N  | 0.98020600  | -0.75627300 | 0.51767400  |
| C  | 0.75260400  | 2.39562800  | 0.65856200  |
| H  | 0.07581700  | 1.76906400  | 0.06592800  |
| O  | 1.90259900  | 1.67387000  | 1.06660700  |
| H  | 0.20524600  | 2.78452500  | 1.52601500  |
| C  | 1.18517300  | 3.55676500  | -0.21352700 |
| C  | 2.06841700  | -3.16602900 | -0.42162200 |
| H  | 2.39613300  | -3.67410800 | -1.34393100 |
| H  | 0.97542000  | -3.18272100 | -0.39618000 |
| H  | -4.58489400 | -3.23214100 | 3.12173000  |
| H  | -2.93679400 | -3.02939600 | 3.80864000  |
| H  | -2.76696200 | 3.44359900  | 2.17497700  |
| H  | -4.50159200 | 3.00633900  | 2.10422000  |
| H  | -2.18786800 | 1.51519000  | -4.29181600 |
| H  | -1.17437000 | 2.53549700  | -3.23233400 |
| H  | -2.58112500 | -4.64344300 | -2.51601400 |
| H  | -1.56446900 | -5.00959700 | -1.10066400 |
| Cl | 2.25902300  | 4.66442000  | 0.66761900  |
| Cl | -0.31457600 | 4.41745900  | -0.69760800 |
| Cl | 2.02354600  | 2.96463600  | -1.68437800 |
| C  | 2.57766600  | -1.77527700 | -0.42412200 |
| C  | 1.64979300  | -0.70430100 | -0.79975500 |
| H  | 2.09411900  | 0.26453000  | -1.05203900 |
| H  | 0.90675000  | -0.98119500 | -1.55422200 |
| C  | 3.99605900  | -1.52217400 | -0.03682400 |
| C  | 4.92168600  | -2.55201400 | -0.71237600 |
| C  | 4.51610500  | -0.11786900 | -0.33913400 |
| H  | 4.07846200  | -1.68216700 | 1.05209400  |
| H  | 4.86303500  | -2.43743200 | -1.80778600 |
| H  | 4.63881700  | -3.58550100 | -0.49036400 |
| C  | 5.97110400  | 0.00935600  | -0.03954200 |
| H  | 4.34394300  | 0.12444100  | -1.40387800 |
| H  | 3.95914900  | 0.63875000  | 0.22577900  |
| C  | 6.84046100  | -1.01939000 | 0.01526500  |
| H  | 6.34267700  | 1.01953900  | 0.14501200  |
| H  | 2.46770500  | -3.75323600 | 0.41464600  |
| C  | 6.37808000  | -2.38008700 | -0.30988700 |
| O  | 7.13646100  | -3.33910700 | -0.31042600 |
| C  | 8.28687900  | -0.86689100 | 0.34887800  |
| H  | 8.91956200  | -1.24193300 | -0.46446200 |
| H  | 8.54638900  | 0.17818100  | 0.54510900  |
| H  | 8.55030400  | -1.46233000 | 1.23100800  |
| H  | -3.74299700 | 3.78957200  | 0.72182200  |
| H  | -4.15854400 | -1.76222600 | 4.00339200  |
| H  | -0.83643500 | -4.23881600 | -2.50733000 |
| H  | -0.48558300 | 1.08228300  | -3.94041800 |

**O<sup>-3</sup>TS<sub>2</sub>**

|    |            |             |             |
|----|------------|-------------|-------------|
| Rh | 3.79096300 | -1.05158300 | 0.35531700  |
| Rh | 1.46391400 | -0.65896700 | -0.22403100 |
| O  | 4.12511100 | -1.53203800 | -1.62047800 |
| C  | 3.16415100 | -1.51193200 | -2.45310600 |
| O  | 1.96040100 | -1.21453100 | -2.17659400 |
| O  | 3.25546100 | -3.02155400 | 0.74546800  |
| C  | 2.05067300 | -3.38710300 | 0.58666800  |
| O  | 1.07824800 | -2.65401000 | 0.20916400  |
| O  | 1.19392300 | -0.12082600 | 1.82083900  |
| C  | 2.17883900 | -0.18690200 | 2.61836900  |
| O  | 3.36020200 | -0.53955200 | 2.30469200  |
| O  | 4.17893100 | 0.93681300  | -0.06892100 |

|    |             |             |             |
|----|-------------|-------------|-------------|
| C  | 3.21235300  | 1.67178500  | -0.44056700 |
| O  | 2.00379500  | 1.30757400  | -0.60670400 |
| C  | 3.48396500  | -1.83816700 | -3.87939000 |
| C  | 1.74125500  | -4.83157500 | 0.84755100  |
| C  | 3.50582800  | 3.12181200  | -0.69066100 |
| C  | 1.92623300  | 0.15519000  | 4.05641900  |
| O  | -2.75278300 | 0.70908900  | -1.45988000 |
| S  | -1.32599400 | 0.87647900  | -1.22711800 |
| O  | -0.49192700 | 1.46235300  | -2.26673300 |
| N  | -0.68702400 | -0.48902200 | -0.55430500 |
| C  | -0.40086600 | 2.98975700  | 0.06720100  |
| H  | 0.25484600  | 3.00865100  | 0.94635900  |
| O  | -1.17107100 | 1.81471200  | 0.14097000  |
| H  | 0.21080000  | 3.01154200  | -0.84121100 |
| C  | -1.29225600 | 4.22975400  | 0.10357000  |
| Cl | -2.35844300 | 4.27495700  | -1.31203900 |
| Cl | -0.19772000 | 5.65303900  | 0.10002000  |
| Cl | -2.27626200 | 4.24526200  | 1.59679400  |
| H  | 0.67307900  | -4.97944200 | 1.01904500  |
| H  | 2.31967800  | -5.19516300 | 1.70049600  |
| H  | 3.86004600  | -0.93548300 | -4.37408300 |
| H  | 4.26868500  | -2.59651500 | -3.93232000 |
| H  | 1.52490300  | -0.72650200 | 4.56926500  |
| H  | 1.18084200  | 0.95046700  | 4.13654300  |
| H  | 2.93637300  | 3.48403200  | -1.55107800 |
| H  | 4.57483200  | 3.27937500  | -0.84701100 |
| C  | -6.50159700 | -1.22775700 | -0.71609500 |
| C  | -5.49261900 | -0.41994200 | 0.02931800  |
| C  | -6.62634100 | -2.56768200 | -0.62614200 |
| H  | -7.18208700 | -0.68195300 | -1.37424500 |
| C  | -4.29725500 | -1.26529400 | 0.44536300  |
| H  | -5.98047800 | 0.01402200  | 0.92051400  |
| H  | -5.15604100 | 0.43429400  | -0.57262500 |
| C  | -5.76815700 | -3.32623600 | 0.30799100  |
| C  | -7.62566600 | -3.35950000 | -1.40231500 |
| C  | -3.25513200 | -0.53337000 | 1.26199100  |
| C  | -4.79750800 | -2.52598800 | 1.15475100  |
| H  | -3.80111700 | -1.58385100 | -0.48641700 |
| O  | -5.86467800 | -4.54122100 | 0.42153600  |
| H  | -8.28318200 | -3.92693900 | -0.73289100 |
| H  | -8.24143000 | -2.71769200 | -2.04075900 |
| H  | -7.12917800 | -4.10639100 | -2.03361300 |
| C  | -3.49808100 | 0.65271900  | 1.90208500  |
| H  | -5.31818400 | -2.23360400 | 2.08242900  |
| H  | -3.97979100 | -3.19002300 | 1.46049800  |
| H  | -4.45324000 | 1.16964500  | 1.85139700  |
| H  | -2.70880100 | 1.14549900  | 2.46468600  |
| C  | -1.97394100 | -1.10484800 | 1.34287900  |
| H  | -0.98058800 | -1.26443000 | -1.16072100 |
| H  | -1.18227700 | -0.63760500 | 1.92239700  |
| H  | -1.78357100 | -2.11883200 | 0.99736500  |
| H  | 2.59071700  | -2.16985300 | -4.41235300 |
| H  | 2.03618900  | -5.42453100 | -0.02543100 |
| H  | 2.85249400  | 0.44713600  | 4.55560400  |
| H  | 3.19513400  | 3.71024100  | 0.18098100  |

**O-<sup>1</sup>PC<sub>A-S</sub>**

|    |             |             |             |
|----|-------------|-------------|-------------|
| Rh | 0.98100200  | -2.97277900 | -0.29552900 |
| Rh | 0.45810200  | -0.67499900 | 0.15917600  |
| O  | -0.96815100 | -3.46260200 | 0.17443300  |
| C  | -1.79883000 | -2.52147400 | 0.35073000  |
| O  | -1.53710800 | -1.27539800 | 0.33816600  |
| O  | 1.51531300  | -3.17676800 | 1.69124200  |
| C  | 1.34325400  | -2.18712000 | 2.47015900  |
| O  | 0.89850200  | -1.03879400 | 2.15055300  |
| O  | 2.50506400  | -0.30723500 | -0.10313500 |
| C  | 3.25722900  | -1.23318900 | -0.54890200 |
| O  | 2.91764800  | -2.43554100 | -0.76385700 |
| O  | 0.40708900  | -2.66252700 | -2.26608800 |
| C  | 0.09760500  | -1.48779200 | -2.62636200 |
| O  | 0.10124500  | -0.44742700 | -1.88782600 |
| O  | -1.29219900 | 2.96263600  | 2.61706300  |
| S  | -1.51655100 | 1.77158600  | 1.83033100  |
| O  | -1.57849500 | 0.47298600  | 2.45325900  |
| N  | -0.37052800 | 1.68633000  | 0.53753600  |
| C  | -3.84159700 | 0.94923300  | 0.89763200  |
| H  | -3.32394700 | -0.01092100 | 1.01014400  |
| O  | -2.93108100 | 2.04073800  | 1.01435600  |
| H  | -4.62110100 | 1.05746800  | 1.66103400  |
| C  | -4.50385700 | 0.99282500  | -0.47397000 |
| Cl | -5.19402700 | 2.60684100  | -0.78552400 |
| Cl | -5.81548000 | -0.22791900 | -0.44278100 |
| Cl | -3.33684300 | 0.58185200  | -1.75652000 |

## ARTICLE

## Journal Name

|   |             |             |             |
|---|-------------|-------------|-------------|
| C | 3.99099600  | 2.25166200  | 1.01019100  |
| C | 2.51905800  | 2.39884100  | 1.18237500  |
| C | 4.68709700  | 2.67677400  | -0.06361200 |
| H | 4.53032200  | 1.75288300  | 1.82019800  |
| C | 1.81354600  | 2.65468600  | -0.14713200 |
| H | 2.31471300  | 3.22076600  | 1.89253100  |
| H | 2.10892900  | 1.49220300  | 1.65008500  |
| C | 3.99621500  | 3.39640700  | -1.15420700 |
| C | 6.15733900  | 2.47518000  | -0.22848400 |
| C | 0.33880900  | 2.94144800  | 0.05498200  |
| C | 2.53883300  | 3.74979700  | -0.92327400 |
| H | 1.89262900  | 1.72740100  | -0.73032500 |
| O | 4.58627600  | 3.73469000  | -2.17140900 |
| H | 6.67579400  | 3.43341400  | -0.35343100 |
| H | 6.59181500  | 1.95156600  | 0.63013100  |
| H | 6.37759500  | 1.89966200  | -1.13627100 |
| H | 2.52413200  | 4.69369200  | -0.35348800 |
| H | 2.07238900  | 3.95892600  | -1.89402200 |
| C | -0.66801100 | 2.28181800  | -0.78838300 |
| H | -1.63262300 | 2.77694000  | -0.88933900 |
| H | -0.39262900 | 1.62412800  | -1.61108800 |
| C | -0.01164700 | 4.30907600  | 0.58345900  |
| H | 0.46543400  | 4.53004800  | 1.54272800  |
| H | 0.33597400  | 5.04455100  | -0.15178300 |
| H | -1.08720600 | 4.44711500  | 0.70802000  |
| C | -3.23101100 | -2.90015100 | 0.59069600  |
| H | -3.34216900 | -3.98396900 | 0.65521300  |
| H | -3.59187900 | -2.43865200 | 1.51685500  |
| H | -3.85667900 | -2.52277000 | -0.22670500 |
| C | 1.66689400  | -2.39977700 | 3.91988700  |
| H | 2.00248400  | -1.46816900 | 4.38158000  |
| H | 0.76018300  | -2.72178600 | 4.44454900  |
| H | 2.42110700  | -3.18109600 | 4.03723900  |
| C | 4.67599900  | -0.84839000 | -0.85091000 |
| H | 5.13925600  | -0.40524600 | 0.03698800  |
| H | 5.25453800  | -1.71340600 | -1.17993900 |
| H | 4.69071100  | -0.07721800 | -1.62961600 |
| C | -0.34426400 | -1.30637500 | -4.04896300 |
| H | 0.24139700  | -1.94326300 | -4.71652200 |
| H | -1.39258600 | -1.61511900 | -4.13834000 |
| H | -0.26653800 | -0.26094200 | -4.35612300 |

O-<sup>1</sup>PC<sub>A-R</sub>

|    |             |             |             |
|----|-------------|-------------|-------------|
| Rh | -1.50392300 | -0.54297700 | 0.10975700  |
| Rh | -3.83815500 | -0.13795300 | -0.24378400 |
| O  | -1.33334500 | -0.74525300 | -1.97818900 |
| C  | -2.40342200 | -0.80208400 | -2.67125600 |
| O  | -3.58236400 | -0.64794400 | -2.23703500 |
| O  | -1.98101600 | -2.56577800 | 0.27977300  |
| C  | -3.20969500 | -2.89136600 | 0.35424100  |
| O  | -4.20564100 | -2.11486900 | 0.22171600  |
| O  | -4.02251300 | 0.35702200  | 1.74931800  |
| C  | -3.04234300 | 0.06471800  | 2.50622800  |
| O  | -1.92115300 | -0.40414100 | 2.13795400  |
| O  | -1.17909200 | 1.50328600  | -0.12811200 |
| C  | -2.16193400 | 2.22450300  | -0.50647100 |
| O  | -3.35309900 | 1.83371300  | -0.68674700 |
| O  | 2.61162200  | -0.40683100 | 2.30288800  |
| S  | 1.59467300  | 0.33126000  | 1.58796500  |
| O  | 0.45548100  | 0.89833600  | 2.26518200  |
| N  | 1.00868600  | -0.60696200 | 0.26247100  |
| O  | 2.39148800  | 1.58323900  | 0.84643300  |
| C  | 1.70472000  | 2.83561600  | 0.83469200  |
| H  | 0.63880200  | 2.69950400  | 0.61103900  |
| H  | 1.82321600  | 3.33204400  | 1.80489800  |
| C  | 2.34188500  | 3.70505100  | -0.23736000 |
| Cl | 4.10281200  | 3.81662500  | 0.00491500  |
| Cl | 1.60370000  | 5.32604700  | -0.09847000 |
| Cl | 2.01097300  | 3.03335800  | -1.86230800 |
| C  | 1.53316400  | -0.36606700 | -1.10205800 |
| C  | 1.85269500  | -1.65543900 | -0.46370700 |
| H  | 2.32180500  | 0.37710800  | -1.17584400 |
| H  | 0.74697100  | -0.29332400 | -1.85182500 |
| C  | 0.98927100  | -2.83899100 | -0.81277800 |
| C  | 3.29371400  | -1.98682300 | -0.04115200 |
| H  | 1.39173300  | -3.34789800 | -1.69548200 |
| H  | -0.02903500 | -2.52396000 | -1.04369000 |
| H  | 0.94520100  | -3.56057400 | 0.01107400  |
| C  | 3.82114600  | -3.21572000 | -0.79051900 |
| C  | 4.31121100  | -0.85941400 | -0.23203100 |
| H  | 3.27608900  | -2.24468500 | 1.02639400  |
| H  | 3.85575700  | -3.00836000 | -1.87403100 |
| H  | 3.18663700  | -4.09705500 | -0.66434200 |



|   |             |             |             |
|---|-------------|-------------|-------------|
| C | 5.21935500  | -3.62515300 | -0.35977900 |
| C | 5.69566900  | -1.28916700 | 0.12510800  |
| H | 4.30168600  | -0.53002500 | -1.28687600 |
| H | 4.05841300  | 0.02950400  | 0.35393300  |
| C | 6.13075000  | -2.56342900 | 0.10429300  |
| O | 5.58053100  | -4.79122900 | -0.44081400 |
| H | 6.39156200  | -0.49865700 | 0.41504200  |
| C | 7.51158900  | -2.97906000 | 0.48630600  |
| H | 8.00791700  | -3.50066200 | -0.34052500 |
| H | 8.12383000  | -2.12071400 | 0.78090600  |
| H | 7.48950900  | -3.69340400 | 1.31800700  |
| C | -1.86377800 | 3.67713700  | -0.74209200 |
| H | -2.71677900 | 4.18346300  | -1.19759500 |
| H | -1.63323300 | 4.16316600  | 0.21345700  |
| H | -0.98056500 | 3.78645200  | -1.38111000 |
| C | -3.21300700 | 0.29119500  | 3.97922300  |
| H | -2.42091300 | 0.95382400  | 4.34253400  |
| H | -4.19192600 | 0.72116800  | 4.19931400  |
| H | -3.10225900 | -0.65859700 | 4.51256900  |
| C | -3.50010200 | -4.33472500 | 0.64512200  |
| H | -3.27943000 | -4.54307300 | 1.69795500  |
| H | -4.54838800 | -4.56910900 | 0.45087300  |
| H | -2.85101100 | -4.98004300 | 0.04658700  |
| C | -2.23465700 | -1.07051000 | -4.13840000 |
| H | -3.20320300 | -1.20049700 | -4.62423900 |
| H | -1.70739800 | -0.23306000 | -4.60799900 |
| H | -1.61885500 | -1.96267400 | -4.28944800 |

**O-<sup>1</sup>PC<sub>i</sub>**

|    |             |             |             |
|----|-------------|-------------|-------------|
| Rh | -1.41862400 | -3.05461600 | -0.36209000 |
| Rh | -0.45644300 | -0.92835700 | 0.17041000  |
| O  | -3.11017800 | -2.52134800 | 0.69956400  |
| C  | -3.13392400 | -1.38059900 | 1.25485700  |
| O  | -2.20554600 | -0.50961000 | 1.23460400  |
| O  | -0.55546500 | -3.79347300 | 1.37002000  |
| C  | 0.17269900  | -3.02379900 | 2.06915200  |
| O  | 0.40835900  | -1.79119700 | 1.84156200  |
| O  | 1.23459000  | -1.48297100 | -0.89943400 |
| C  | 1.27435400  | -2.65137400 | -1.42166400 |
| O  | 0.34218800  | -3.50477300 | -1.38409400 |
| O  | -2.24087900 | -2.17340100 | -2.06077400 |
| C  | -2.04994500 | -0.93808500 | -2.26526500 |
| O  | -1.34608800 | -0.15165600 | -1.54446200 |
| C  | -4.39122900 | -1.00438900 | 1.98318300  |
| C  | 0.84397000  | -3.61988500 | 3.27063600  |
| C  | -2.71839800 | -0.31843400 | -3.45731100 |
| C  | 2.53967500  | -3.00112400 | -2.14471500 |
| O  | 1.60616100  | 3.08041700  | 1.91999200  |
| S  | 0.50054400  | 2.17816200  | 1.69825800  |
| O  | -0.13355800 | 1.44106000  | 2.76559600  |
| N  | 0.86569800  | 1.01988500  | 0.47239600  |
| C  | -1.85440500 | 2.41305600  | 0.66309000  |
| H  | -1.72767000 | 1.48018200  | 0.10275900  |
| O  | -0.59113000 | 3.05964200  | 0.87580700  |
| H  | -2.33645400 | 2.19653600  | 1.62211700  |
| C  | -2.72530400 | 3.34357400  | -0.15645800 |
| Cl | -2.96976500 | 4.89640400  | 0.66761700  |
| Cl | -4.29029700 | 2.49591700  | -0.35751200 |
| Cl | -1.99095000 | 3.62515400  | -1.76305200 |
| H  | 1.87549100  | -3.88473500 | 3.01172600  |
| H  | 0.32760500  | -4.52685400 | 3.59112200  |
| H  | -5.09281400 | -0.54671600 | 1.27596300  |
| H  | -4.87199800 | -1.89139000 | 2.40242200  |
| H  | 2.56822300  | -4.06515700 | -2.38659800 |
| H  | 3.41515300  | -2.71900000 | -1.54697900 |
| H  | -2.01567800 | 0.32426100  | -3.99564900 |
| H  | -3.54249900 | 0.32119400  | -3.12017200 |
| C  | 6.17746100  | 1.92535100  | 0.15501400  |
| C  | 4.97059500  | 2.65786700  | -0.32795100 |
| C  | 6.31652600  | 0.58339700  | 0.15224000  |
| H  | 7.00202900  | 2.53362800  | 0.53479900  |
| C  | 3.73281300  | 1.77280200  | -0.32765200 |
| H  | 5.15995400  | 3.03611600  | -1.34829400 |
| H  | 4.79755300  | 3.55220400  | 0.28676400  |
| C  | 5.25082500  | -0.26028400 | -0.42519500 |
| C  | 7.52245000  | -0.12252200 | 0.67645500  |
| C  | 2.49414600  | 2.42147400  | -0.89025900 |
| C  | 4.05521600  | 0.44656100  | -1.02607700 |
| H  | 3.52741400  | 1.54040700  | 0.73403700  |
| O  | 5.34825300  | -1.48240300 | -0.45444400 |
| H  | 7.98514500  | -0.74327100 | -0.09983400 |
| H  | 8.26913100  | 0.58285700  | 1.05509800  |
| H  | 7.25206000  | -0.81085600 | 1.48618100  |

## ARTICLE

## Journal Name

|   |             |             |             |
|---|-------------|-------------|-------------|
| C | 2.45791100  | 3.64071400  | -1.43290700 |
| H | 4.27943000  | 0.64771500  | -2.08760600 |
| H | 3.21268900  | -0.25543700 | -1.01722700 |
| H | 3.33932700  | 4.27175800  | -1.52019600 |
| H | 1.52539600  | 4.06379300  | -1.80297400 |
| C | 1.24163900  | 1.59024200  | -0.85595600 |
| H | 1.62876900  | 0.45099700  | 0.85460200  |
| H | 0.37528200  | 2.15406300  | -1.21127300 |
| H | 1.32767000  | 0.70630300  | -1.49902200 |
| H | 0.88502000  | -2.89339100 | 4.08610200  |
| H | -4.18179000 | -0.27537000 | 2.76974100  |
| H | 2.59186600  | -2.42672500 | -3.07749700 |
| H | -3.11578200 | -1.08575600 | -4.12413700 |
